# Supplementary material for: Hepatoma-Derived Growth Factor Secreted from Mesenchymal Stem Cells Reduces Myocardial Ischemia-Reperfusion Injury
Source: Hindawi journal article supplement (doi:10.1155/2017/1096980), 2017-01-01
Supplement: f1 [file 1096980.f1.pdf]

## **Supplemental Information**

### **Materials and Methods**

#### **Animal**

Wild-type (WT) littermates and PKC $\epsilon$  dominant negative (PKC $\epsilon$ -DN) mice were obtained from Prof. Peipei Ping as a gift[1]. The animals were fed a standard laboratory diet with free access to food and water, and kept in an environment with controlled room temperature, humidity (65%–70%), and a 12:12 h light/dark cycle. Male mice 8-12 weeks of age were used for the study. All animal studies were performed with the approval of the Institutional Animal Care and Use Committee, Zhejiang University and according to the Chinese Guideline for Laboratory Animal Care and Use.

#### ***In Vivo* Models**

The mice were anesthetized with intraperitoneal injection of pentobarbital sodium (60 mg/kg). A rodent ventilator was used. Myocardium ischemia was achieved by ligating the left anterior descending (LAD) coronary artery including silicon tubing on top of the coronary artery with an 8-0 Prolene suture. Fifteen minutes before occlusion, 0.2 mL of vehicle or MSC-CdM or CF-CdM was injected via tail vein. After 45 min of ischemia, silicon tubing was removed to achieve reperfusion. The mice were sacrificed at various times for different experiments.

#### **Hypoxia/Reoxygenation**

Cells were subjected to hypoxia and reoxygenation with a buffer simulating the ischemic milieu containing 128 mM NaCl, 2.2 mM NaHCO<sub>3</sub>, 14.8 mM KCl, 1.2 mM MgSO<sub>4</sub>, 1.2 mM K<sub>2</sub>HPO<sub>4</sub>, 1 mM CaCl<sub>2</sub>, and 10 mM sodium-lactate (pH 6.4) in a hypoxic chamber containing 95% N<sub>2</sub>/5% CO<sub>2</sub>. After this, the cells were placed in a standard incubator in a normal medium.

#### **Isolation of Mesenchymal Stem Cells**

Mice MSCs were isolated from 4- to 5-week-old WT mice bone marrow, characterized for their surface antigen profiling by flow cytometry and cultured as described previously[2]. Briefly, bone marrows from three mice were plated in a 10-cm dish in DMEM/F12 (Invitrogen, CA, USA) supplemented with 20% bovine serum albumin and antibiotics. After 3-5 passages, the cells were characterized for their surface antigen profiling by flow cytometry. The cells ( $1 \times 10^6$  cells/100  $\mu$ L) were resuspended in phosphate-buffered saline (PBS) with 1% FBS for each antibody and incubated with mouse-specific antibodies fluorescein isothiocyanate (FITC)-CD34, phycoerythrin (PE)-CD105 and PE-CD166, APC- CD45 and PE-CD73 (all from BD Biosciences, CA, USA). After 45 min at 4°C, the cells were washed twice in PBS, and at least 10,000 events were acquired for each sample. The cells expressed the MSC markers CD105, CD73, and CD90 and were negative for the markers CD34, CD31 and CD45.

### **Isolation of Cardiac Fibroblasts**

Cardiac fibroblasts were isolated from WT mice and characterized as described previously[3]. Briefly, the ventricles of hearts were minced and digested in 0.05% collagenase and 0.05% pancreatin (Gibco, Invitrogen, CA, USA) containing PBS solution at 37°C and waved 4–5 times at 220 rpm for 10 min. The cells were pre-plated for 1-h on uncoated culture dishes (Corning Inc., NY, USA), during which CFs rapidly adhered to the dishes. Fibroblasts up to passage three were identified by fibroblast specific protein 1 (FSP-1), vimentin,  $\alpha$ -SMA, CD31 and Troponin T immunofluorescence staining.

### **Conditioned Media Preparation**

MSCs or fibroblasts of 80% confluence were washed with PBS and cultured in serum-free medium for 24 h for collection. The collected conditioned medium was cleared by centrifugation, and concentrated 25-fold less of the original volume using 3 kDa molecular weight cutoff ultrafiltration membranes (Millipore, MA, USA). The concentrated medium was diluted with PBS and re-concentrated for three times to desalt the medium, and then sterilizing through 220 nm filters. The protein concentration of the final solution was measured using a protein assay kit (Bio-Rad, CA, USA) and diluted with PBS to 0.5 mg/mL for injection.

### **Determination of Myocardial Infarct Size**

After 24 h of reperfusion, the mice were anesthetized with an intraperitoneal injection of pentobarbital sodium (60 mg/kg). Hearts were processed by LAD ligation at the same location as before and were subjected to perfusion with 2% Evan's blue dye via the aorta using a catheter. Then, 1-mm-thick sections of hearts were made along the long axis and incubated in 1% 2,3,5-triphenyltetrazolium chloride (Sigma-Aldrich) for 5 min at 37°C. Myocardial slices were assessed by a blinded observer using Image-Pro Plus (Media Cybernetics, Inc, MD, USA).

### **Mitochondria Isolation**

Mitochondria were isolated using a mitochondria protein extraction kit (Keygentec, Nanjing, China) according to the instruction supplied from the manufacturer. Briefly, cultured cardiomyocytes or minced heart tissues were homogenated in ice-cold Lysis Buffer 1 and centrifuged at 800 *g* at 4°C. The supernatants were moved into Medium Buffer, and centrifuged at 15,000 *g* at 4°C. The pellet was mitochondria.

### **Western Blot Analysis**

Proteins were extracted from cells or heart tissues. 40 µg protein for each sample was electrophoresed on a SDS-gel and transferred onto a PVDF membranes (Bio-Rad), blocked with 5% skim milk for 1 hour at room temperature, and incubated overnight at 4°C with primary antibodies against phosphorylated PKCε (1:500, Santa Cruz, CA, USA), PKCε, cleaved caspase-3, β-actin (1:1000, all from Cell Signaling Technology, Danvers, MA, USA), 4HNE (1:500) (both from Abcam, Cambridge, MA, USA). HRP-conjugated secondary antibodies were applied to incubate the membranes at room temperature for 1 hour. Then membranes were exposed with Chemiluminescence Detection Kit (Millipore).

### **Aldehyde Dehydrogenase Family 2 (ALDH2) Activity Assay**

The ALDH2 activity of mitochondria from cardiomyocytes was measured using a mito-ALDH2 activity kit (Abcam) according to the instruction from the manufacturer. Briefly, mitochondria that were isolated from cardiomyocytes were pelleted and solubilized in Extraction Buffer. The samples were incubated in a 96-well plate and reacted with Activity Solution according to the reaction: acetaldehyde + NAD<sup>+</sup> → acid + NADH. The

activity of ALDH2 was measured using SpectraMax 340PC384 Microplate Reader (Molecular Devices, LLC., CA, USA) monitoring the absorbance at 450 nm.

### **Transferase dUTP nick end labeling (TUNEL) Assay and Immunofluorescence Staining**

Heart tissues obtained 24 h after surgery were dehydrated in 30% sucrose solution and embedded in Tissue-Tek OCT Compound and snap frozen in liquid nitrogen. For immunofluorescence, frozen tissue sections (6.0  $\mu\text{m}$  thick) were fixed in 4% paraformaldehyde, permeabilized with 0.2% Triton X-100, and blocked with 5% goat serum. Incubation was performed with primary antibody and respective secondary antibodies. The apoptosis of cells was detected in situ with the use of TUNEL (Roche Applied Science, IN, USA). DAPI was used to stain nuclei, while cTnI antibody (1:200 Abcam) was applied as cardiomyocytes marker. Sections were examined under a fluorescent microscope.

### **Flow Cytometry Analysis of Cell Apoptosis**

The Annexin V-FITC/PI Apoptosis Detection Kit was used to evaluate apoptosis of cells. After being rinsed with ice cold PBS, the cells were resuspended in 200  $\mu\text{l}$  of binding buffer. Ten microliters of Annexin V stock solutions was added to the cells and incubated for 30 min at 4°C. The cells were then incubated with 5 ml propidium iodide (PI) and immediately analyzed with a FACScan. Ten thousands events were acquired on a FACSC-LSR (Becton-Dickinson, San Jose, CA) and analyzed with CellQuest (Becton-Dickinson) software.

### **Hemodynamics Assessment**

Hemodynamic assessment was taken at 24-hour reperfusion by a 1.4 F pressure catheter inserted into the left ventricle (LV) through the right carotid artery. The transducer was connected to Powerlab system (AD Instruments, Castle Hill, Australia). LV pressure and LV maximum  $\pm$  dp/dt were recorded and averaged from 15 beats.

### **Lentivirus Construction and Infection**

Construction of the recombinant lentivirus with HDGF was performed by Genechem Company. For MSCs infection, cells were seeded at a density of  $1 \times 10^5$  cells in a six-well plate and infected with lentiviral vectors

with 10 mg/ml polybrene (Millipore, Boston, MA, USA). At 12-hour post-infection, the medium was replaced. Forty-eight hours later, the transfected cells were cultured in a 5% CO<sub>2</sub>-humidified incubator at 37°C.

### **Real Time Quantitative Polymerase Chain Reaction (RT-qPCR) Analysis**

Primers for amplification of mouse HDGF genes were used to determine the expression of HDGF in fibroblasts and MSCs. The amplification program consisted of initial denaturation at 95 °C for 10 min followed by 40 cycles from 92 °C for 15 s, annealing at 60 °C for 30 s and extension at 72 °C for 15 s. To minimize the effects of unequal quantities of starting RNA and eliminate potential sources of inconsistency, the relative expression levels of each gene was normalized to  $\beta$ -actin using the 2- $\Delta\Delta$ Ct method. Control experiments used no reverse transcriptase.

### **Protein Digestion and iTRAQ Labeling**

For each sample, proteins were precipitated with ice-cold acetone, and then were redissolved in the dissolution buffer (0.5 M triethylammonium bicarbonate, 0.1% SDS). Then proteins were quantified by BCA protein assay, and 100  $\mu$ g of protein was tryptically digested and the resultant peptide mixture was labeled using chemicals from the iTRAQ reagent kit (Applied Biosystems, California, USA). Disulfide bonds were reduced in 5 mM Tris-(2-carboxyethyl) phosphine (TCEP) for 1 h at 60 °C, followed by blocking cysteine residues in 10 mM methylmethanethiosulfonate (MMTS) for 30 min at room temperature, before digestion with sequence-grade modified trypsin (Promega, Madison, WI, USA). For labeling, each iTRAQ reagent was dissolved in 50  $\mu$ L of isopropanol and added to the respective peptide mixture. The labeled samples were combined and dried.

### **High pH reverse phase separation**

The peptide mixture was redissolved in the buffer A (buffer A: 20mM ammonium formate in water, pH10.0, adjusted with ammonium hydroxide), and then fractionated by high pH separation using a Aquity UPLC system (Waters Corporation, Milford, MA, USA) connected to a reverse phase column (ACQUITY UPLC Peptide C18 column, 2.1mm x 150 mm, 1.7 $\mu$ m, 130 Å, Waters Corporation, Milford, MA, USA). High pH separation was performed using a linear gradient. Starting from 5% B to 35% B in 25 min (B: 20mM ammonium formate in 90% ACN, pH 10.0, adjusted with ammonium hydroxide). The column was re-equilibrated at initial conditions for 15 min. The column flow rate was maintained at 600 $\mu$ L/min and column temperature was maintained at room temperature. Collected fractions were dried in a vacuum concentrator for the next step.

### **Low pH nano-HPLC-MS/MS analysis**

The mixed peptides were separated by nano-HPLC (Eksigent Technologies, Dublin, CA, USA) on the secondary RP analytical column (Eksigent, C18, 3 $\mu$ m, 150 mm x 75 $\mu$ m). Peptides were subsequently eluted using the following gradient conditions with phase B (98% ACN with 0.1% formic acid) from 5 to 45%B (5-70 min) and total flow rate was maintained at 300 nL/min. Electrospray voltage of 2.3 kV versus the inlet of the mass spectrometer was used.

Triple TOF 4600 mass spectrometer was operated in data-dependent mode to switch automatically between MS and MS/MS acquisition. MS spectra were acquired across the mass range of 350–1250 m/z in high resolution mode using 250 ms accumulation time per spectrum. Tandem mass spectral scanned from 100-1250 m/z in high sensitivity mode with rolling collision energy. The 20 most intense precursors were selected for fragmentation per cycle with dynamic exclusion time of 9s.

### **Ventricular Myocyte Isolation**

Myocytes were isolated using standard procedures. Briefly, the heart was connected to a plastic cannula for retrograde perfusion through the aorta and perfused with a Ca<sup>2+</sup>-free solution containing (mmol/L) NaCl 117, KCl 5.7, NaHCO<sub>3</sub> 4.4, KH<sub>2</sub>PO<sub>4</sub> 1.5, MgCl<sub>2</sub> 17, HEPES 21.1, and glucose 11.7 (pH 7.4, equilibrated with O<sub>2</sub>) for 5 min at 37°C. It was then perfused with the same solution containing 1 mg/mL collagenase II (283 U/mg; Worthington Biochemical, Lakewood, NJ, USA) until it became flaccid. Finally, it was perfused with Ca<sup>2+</sup>-free solution for 5 min to remove enzymes. The LV was cut into small pieces and these fragments were shaken in the re-suspension medium at 37°C. Intact cells were enriched by centrifugation.

### **Measurement of Intracellular Calcium Transient and Cell Shortening**

Isolated LV myocytes were placed in a bath on the stage of inverted microscopes for contractility and Ca<sup>2+</sup> transients. The cells were washed at room temperature and continuously with a Tyrode solution containing (mmol/L): NaCl 140, KCl 5.4, MgCl<sub>2</sub> 1, HEPES 5, glucose 5.5 and CaCl<sub>2</sub> 1.0 (pH 7.4, adjusted with NaOH). Measurements were performed in field-stimulated cells at pace of 1 Hz by using IonOptix fluorescence and contractility systems (IonOptix, MA, USA) in room temperature. Contractions were elicited by rectangular depolarizing pulses, 2 ms in duration, and twice-diastolic threshold in intensity, by platinum electrodes. Cell

shortening was measured by edge-track detection.  $\text{Ca}^{2+}$  transients were measured by epifluorescence after loading the myocytes with 0.5  $\mu\text{M}$  Fura-2 AM (Molecular Probes, OR, USA). The ratio of fluorescence emission intensities at 510 nm was sampled via a photo multiplier tube at 250 Hz under 340 and 380 nm excitation.

### Statistical Analysis

All data are expressed as mean  $\pm$  SEM and analyzed by SPSS 17. Two tailed Student's t-test was used to perform statistical analysis for comparisons between two groups. One way ANOVA with Bonferroni multiple was applied for comparisons post-hoc test for more than two groups. A probability value less than 0.05 was considered as statistical significance.

### References

1. Baines CP, J Zhang, G-W Wang, Y-T Zheng, JX Xiu, EM Cardwell, R Bolli, and P Ping. (2002). Mitochondrial PKCepsilon and MAPK form signaling modules in the murine heart: enhanced mitochondrial PKCepsilon-MAPK interactions and differential MAPK activation in PKCepsilon-induced cardioprotection. *Circ Res* 90:390-397.
2. Hu X, R Wu, Z Jiang, L Wang, P Chen, L Zhang, L Yang, Y Wu, H Chen, H Chen, Y Xu, Y Zhou, X Huang, KA Webster, H Yu, and Ja Wang. (2014). Leptin Signaling is Required for Augmented Therapeutic Properties of Mesenchymal Stem Cells Conferred by Hypoxia Preconditioning. *Stem Cells*
3. Chen P, R Wu, W Zhu, Z Jiang, Y Xu, H Chen, Z Zhang, L Zhang, H Yu, J Wang, and X Hu. (2014). Hypoxia preconditioned mesenchymal stem cells prevent cardiac fibroblast activation and collagen production via leptin. *PLoS One* 9:e103587.

## Supplementary Figure

Figure S1

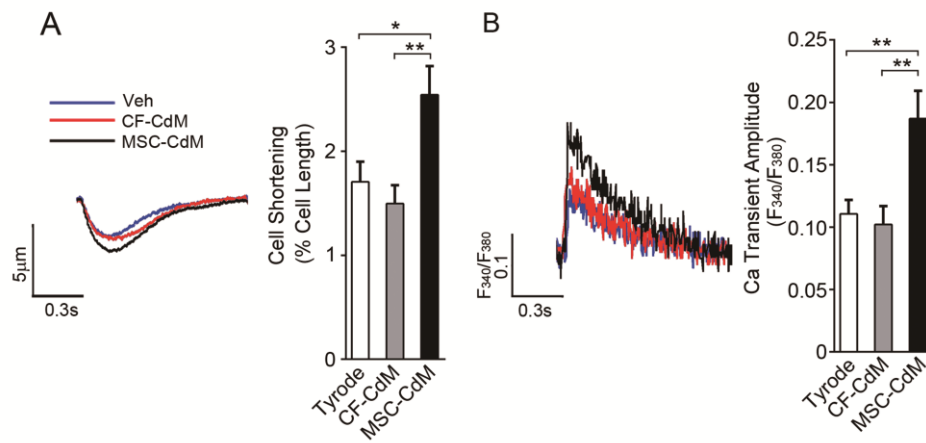

**FIG. S1.** Intracellular calcium transient and contractility of isolated adult myocytes were recorded at 2-hreoxygenation following 4-h hypoxia. **(A)** Typical recordings of contractility of myocytes are shown on the left panel. Contractility of myocytes was measured by video edge detection. Data represent mean  $\pm$  SEM of values from 15 cells. **(B)** Typical recordings of intracellular calcium transient (left panel) are shown. The amplitude of Intracellular calcium transient was assessed by IonOptix system. Data represent mean  $\pm$  SEM of values from 15 cells. \* $P < 0.05$ ; \*\* $P < 0.01$ .



Figure S2

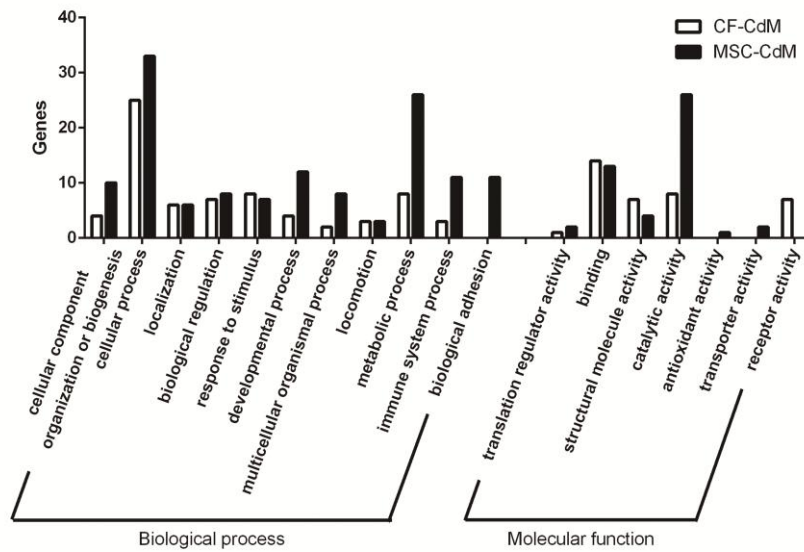

**FIG. S2. Functional categorization of the proteins secreted from MSCs and CFs.** Biological process and molecular function enrichment of secreted proteins.

Figure S3

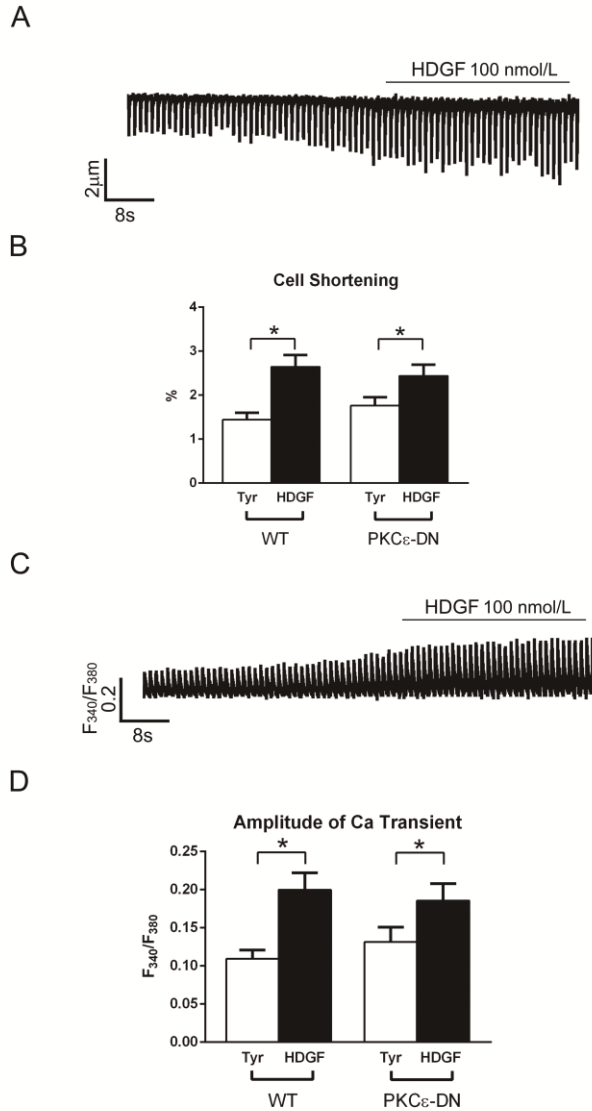

**FIG. S3. HDGF enhanced calcium handling and mechanical properties despite of PKCε disruption.** Adult myocytes isolated from PKCε-DN mice or WT littermate were subjected to 2 h of hypoxia followed by 4 h of reoxygenation with the treatment of vehicle or 100 nmol/L recombinant mouse HDGF. **(A)** Typical recording of myocyte contractility with the treatment of HDGF recorded by video edge detection. **(B)** Cell shortening fraction. **(C)** Typical recording of intracellular calcium transient with the treatment of HDGF recorded by the IonOptix system. **(D)** Amplitude of calcium transient. All Data represent mean± SEM of values from 15-21 cells. \*  $P < 0.05$ .

**Table S1. MSC-CdM improved hemodynamic performance**

|                                    | <b>sham</b> | <b>I/R</b> | <b>CF-CdM</b> | <b>MSC-CdM</b> |
|------------------------------------|-------------|------------|---------------|----------------|
| <b>LVP<sub>max</sub> (mmHg)</b>    | 106±11.1    | 75.4±4.1   | 80.5±5.6      | 89.3±4.3*      |
| <b>+dP/dt<sub>max</sub> (mmHg)</b> | 7278±749    | 4010±580   | 4559±355      | 5935±627*      |
| <b>-dP/dt<sub>max</sub> (mmHg)</b> | -6459±481   | -3491±396  | -4242±282     | -5637±568*     |
| <b>LVEDP (mmHg)</b>                | 3.1±0.5     | 6.6±0.9    | 5.6±0.9       | 4.4±0.7        |
| <b>Exp Tau (ms)</b>                | 14.4±1.0    | 18.9±1.5   | 17.5±.1       | 16.8±1.1       |

Mice treated with CF-CdM, MSC-CdM or vehicle were subjected to hemodynamic measurement at 24-h reperfusion following 45 min of ischemia. Data are mean±SEM of values from six mice. LVP<sub>max</sub>, maximum systolic LV pressure; +dP/dt<sub>max</sub>, maximum positive first derivative of LVP; -dP/dt<sub>max</sub>, maximum negative first derivative of LVP; LVEDP, Left Ventricular End-Diastolic Pressure; Exp Tau, Exponential Tau. \*P<0.05 versus I/R.

**Table S2. Recombinant HDGF improved hemodynamic performance via PKC $\epsilon$  pathway**

|                                    | WT sham         | WT I/R          | WT HDGF          | DN sham         | DN I/R          | DN HDGF          |
|------------------------------------|-----------------|-----------------|------------------|-----------------|-----------------|------------------|
| <b>LVP<sub>max</sub> (mmHg)</b>    | 109.5 $\pm$ 4.1 | 75.4 $\pm$ 3.6  | 86.5 $\pm$ 3.2*  | 100.3 $\pm$ 7.1 | 76.3 $\pm$ 3.0  | 82.1 $\pm$ 3.4   |
| <b>+dP/dt<sub>max</sub> (mmHg)</b> | 7255 $\pm$ 527  | 4325 $\pm$ 383  | 6079 $\pm$ 412*  | 7413 $\pm$ 665  | 4170 $\pm$ 314  | 5017 $\pm$ 209*# |
| <b>-dP/dt<sub>max</sub> (mmHg)</b> | -6617 $\pm$ 856 | -3690 $\pm$ 332 | -5062 $\pm$ 279* | -6552 $\pm$ 885 | -3400 $\pm$ 322 | -4134 $\pm$ 302# |
| <b>LVEDP (mmHg)</b>                | 3.3 $\pm$ 0.7   | 6.0 $\pm$ 0.9   | 4.4 $\pm$ 1.3    | 3.7 $\pm$ 0.8   | 6.4 $\pm$ 0.8   | 5.7 $\pm$ 1.0    |
| <b>Exp Tau (ms)</b>                | 14.0 $\pm$ 0.9  | 19.4 $\pm$ 0.4  | 18.2 $\pm$ 0.4   | 14.9 $\pm$ 1.3  | 18.9 $\pm$ 0.6  | 17.5 $\pm$ 1.0   |

PKC $\epsilon$ -DN and WT mice were subjected to hemodynamic measurement at 24-h reperfusion following 45 min of ischemia. Data are mean $\pm$ SEM of values from six mice. LVP<sub>max</sub>, maximum systolic LV pressure; +dP/dt<sub>max</sub>, maximum positive first derivative of LVP; -dP/dt<sub>max</sub>, maximum negative first derivative of LVP; LVEDP, Left Ventricular End-Diastolic Pressure; Exp Tau, Exponential Tau. \*P<0.05 versus I/R; #P<0.05 versus WT HDGF.

**Table S3: Proteins Identified by iTRAQ**

| Identified Proteins                                                                                                   | CF-<br>CdM1 | CF-<br>CdM2 | CF-<br>CdM3 | MSC-<br>CdM1 | MSC-<br>CdM2 | MSC-<br>CdM3 |
|-----------------------------------------------------------------------------------------------------------------------|-------------|-------------|-------------|--------------|--------------|--------------|
| Cullin-4B OS=Mus musculus GN=Cul4b PE=1 SV=1                                                                          | 1.035       | 0.838       | 0.936       | 1.059        | 0.852        | 0.807        |
| Receptor-type tyrosine-protein phosphatase F OS=Mus musculus GN=Ptpfr PE=1 SV=1                                       | 1.000       | 1.244       | 1.122       | 1.370        | 0.631        | 1.501        |
| Protein SZT2 OS=Mus musculus GN=Szt2 PE=1 SV=1                                                                        | 1.000       | 1.100       | 1.050       | 1.512        | 0.990        | 1.174        |
| Obscurin OS=Mus musculus GN=Obscn PE=1 SV=2                                                                           | 1.000       | 0.996       | 0.998       | 0.699        | 1.230        | 0.726        |
| Cytoskeleton-associated protein 5 OS=Mus musculus GN=Ckap5 PE=1 SV=1                                                  | 1.000       | 0.770       | 0.885       | 0.602        | 0.790        | 0.623        |
| Leucine zipper putative tumor suppressor 3 OS=Mus musculus GN=Lzts3 PE=1 SV=1                                         | 1.000       | 0.870       | 0.935       | 0.509        | 0.798        | 0.521        |
| Protein virilizer homolog OS=Mus musculus GN=Kiaa1429 PE=1 SV=1                                                       | 1.000       | 1.361       | 1.181       | 1.128        | 1.034        | 1.278        |
| Tubulin beta-1 chain OS=Mus musculus GN=Tubb1 PE=1 SV=1                                                               | 1.000       | 0.899       | 0.949       | 0.976        | 0.885        | 1.043        |
| Agrin OS=Mus musculus GN=Agrrn PE=1 SV=1                                                                              | 1.000       | 0.926       | 0.963       | 0.459        | 0.377        | 0.503        |
| Titin OS=Mus musculus GN=Ttn PE=1 SV=1                                                                                | 1.000       | 0.975       | 0.987       | 1.171        | 0.893        | 1.495        |
| Sushi, von Willebrand factor type A, EGF and pentraxin domain-containing protein 1 OS=Mus musculus GN=Svep1 PE=1 SV=1 | 1.000       | 0.934       | 0.967       | 0.347        | 0.377        | 0.441        |
| AT-rich interactive domain-containing protein 1A OS=Mus musculus GN=Arid1a PE=1 SV=1                                  | 1.000       | 0.817       | 0.908       | 0.621        | 0.773        | 0.946        |
| Inter alpha-trypsin inhibitor, heavy chain 4 OS=Mus musculus GN=Itih4 PE=1 SV=2                                       | 1.000       | 1.041       | 1.021       | 1.204        | 1.062        | 1.644        |
| Metalloprotease TIKI2 OS=Mus musculus GN=Trabd2b PE=2 SV=1                                                            | 1.000       | 1.042       | 1.021       | 0.962        | 0.986        | 0.981        |
| N-acetyllactosaminide beta-1,3-N-acetylglucosaminyltransferase OS=Mus musculus GN=B3gnt1 PE=2 SV=1                    | 1.000       | 1.051       | 1.026       | 0.911        | 0.967        | 1.216        |
| Scaffold attachment factor B1 OS=Mus musculus GN=Safrb PE=1 SV=2                                                      | 1.126       | 0.957       | 1.041       | 1.399        | 1.465        | 1.306        |
| Bifunctional ATP-dependent dihydroxyacetone kinase/FAD-AMP lyase (cyclizing) OS=Mus musculus GN=Dak PE=2 SV=1         | 1.000       | 0.823       | 0.911       | 1.221        | 1.323        | 1.348        |
| Coiled-coil domain-containing protein 62 OS=Mus musculus GN=Ccdc62 PE=3 SV=1                                          | 1.000       | 1.120       | 1.060       | 1.009        | 0.559        | 1.000        |
| Ryanodine receptor 1 OS=Mus musculus GN=Ryr1 PE=1 SV=1                                                                | 1.000       | 1.070       | 1.035       | 0.655        | 0.382        | 0.704        |
| Interferon regulatory factor 2-binding protein 2 OS=Mus musculus GN=Irf2bp2 PE=1 SV=1                                 | 1.000       | 1.541       | 1.270       | 1.825        | 1.308        | 1.086        |
| Apolipoprotein B-100 OS=Mus musculus GN=Apob PE=1 SV=1                                                                | 0.936       | 1.106       | 1.021       | 0.917        | 0.997        | 1.002        |
| Nucleoprotein TPR OS=Mus musculus GN=Tpr PE=1 SV=1                                                                    | 1.000       | 0.947       | 0.973       | 1.128        | 0.898        | 1.140        |
| FERM, RhoGEF and pleckstrin domain-containing protein 1 OS=Mus musculus GN=Farp1 PE=1 SV=1                            | 1.000       | 0.921       | 0.961       | 0.920        | 0.715        | 0.856        |
| Mitochondrial inner membrane protein OS=Mus musculus GN=Immt PE=1 SV=1                                                | 1.000       | 0.952       | 0.976       | 0.945        | 0.577        | 0.863        |
| Serine/threonine-protein kinase MST4 OS=Mus musculus GN=Mst4 PE=2 SV=1                                                | 0.945       | 1.137       | 1.041       | 1.510        | 1.666        | 0.869        |
| Alpha-tectorin OS=Mus musculus GN=Tecta PE=1 SV=2                                                                     | 1.000       | 0.938       | 0.969       | 1.102        | 0.618        | 1.025        |
| Calpain-2 catalytic subunit OS=Mus musculus GN=Capn2 PE=1 SV=4                                                        | 1.000       | 0.917       | 0.958       | 0.732        | 0.727        | 0.716        |
| Myc box-dependent-interacting protein 1 OS=Mus musculus GN=Bin1 PE=1 SV=1                                             | 1.070       | 1.168       | 1.119       | 1.455        | 1.630        | 1.647        |
| Vesicle-trafficking protein SEC22b OS=Mus musculus GN=Sec22b PE=1 SV=3                                                | 1.000       | 1.057       | 1.029       | 0.819        | 0.857        | 0.992        |

|                                                                                              |       |       |       |       |       |       |
|----------------------------------------------------------------------------------------------|-------|-------|-------|-------|-------|-------|
| Dihydropyrimidinase-related protein 2 OS=Mus musculus GN=Dpysl2 PE=1 SV=2                    | 1.042 | 1.028 | 1.035 | 1.108 | 1.131 | 1.166 |
| THO complex subunit 4 OS=Mus musculus GN=Alyref PE=1 SV=3                                    | 0.992 | 1.065 | 1.029 | 1.419 | 1.399 | 1.725 |
| Clathrin light chain A OS=Mus musculus GN=Clta PE=1 SV=2                                     | 1.000 | 1.032 | 1.016 | 0.811 | 0.903 | 1.083 |
| Methionine aminopeptidase 2 OS=Mus musculus GN=Metap2 PE=1 SV=1                              | 1.054 | 0.984 | 1.019 | 1.517 | 1.478 | 1.617 |
| Peroxiredoxin-6 OS=Mus musculus GN=Prdx6 PE=1 SV=3                                           | 1.055 | 1.025 | 1.040 | 1.386 | 1.394 | 1.276 |
| Dihydrolipoyl dehydrogenase, mitochondrial OS=Mus musculus GN=Dld PE=1 SV=2                  | 1.000 | 0.919 | 0.960 | 0.771 | 0.881 | 0.696 |
| Ubiquitin-protein ligase E3A OS=Mus musculus GN=Ube3a PE=1 SV=2                              | 1.000 | 0.990 | 0.995 | 1.597 | 0.868 | 1.943 |
| Treacle protein OS=Mus musculus GN=Tcof1 PE=1 SV=1                                           | 0.983 | 1.575 | 1.279 | 3.300 | 4.498 | 5.857 |
| Dynactin subunit 1 OS=Mus musculus GN=Dctn1 PE=1 SV=3                                        | 1.087 | 0.979 | 1.033 | 0.726 | 0.752 | 0.750 |
| Glucosidase 2 subunit beta OS=Mus musculus GN=Prkcsh PE=1 SV=1                               | 1.036 | 1.057 | 1.047 | 0.867 | 1.180 | 0.837 |
| Peroxiredoxin-4 OS=Mus musculus GN=Prdx4 PE=1 SV=1                                           | 0.998 | 1.115 | 1.057 | 0.776 | 0.867 | 0.965 |
| Protein diaphanous homolog 1 OS=Mus musculus GN=Diaph1 PE=1 SV=1                             | 1.000 | 0.792 | 0.896 | 0.340 | 0.480 | 0.711 |
| 116 kDa U5 small nuclear ribonucleoprotein component OS=Mus musculus GN=Eftud2 PE=1 SV=1     | 1.000 | 1.064 | 1.032 | 1.080 | 0.926 | 0.892 |
| AH receptor-interacting protein OS=Mus musculus GN=Aip PE=1 SV=1                             | 0.997 | 0.928 | 0.963 | 1.292 | 1.094 | 1.095 |
| Syntenin-1 OS=Mus musculus GN=Sdcbp PE=1 SV=1                                                | 1.261 | 1.316 | 1.288 | 1.691 | 1.672 | 2.069 |
| Copper transport protein ATOX1 OS=Mus musculus GN=Atox1 PE=1 SV=1                            | 0.934 | 0.902 | 0.918 | 1.463 | 1.509 | 1.474 |
| Latent-transforming growth factor beta-binding protein 2 OS=Mus musculus GN=Ltbp2 PE=1 SV=2  | 0.993 | 0.928 | 0.961 | 1.048 | 0.982 | 1.077 |
| Proteasome subunit beta type-1 OS=Mus musculus GN=Psmb1 PE=1 SV=1                            | 1.174 | 1.320 | 1.247 | 2.135 | 2.076 | 1.896 |
| Histone deacetylase 1 OS=Mus musculus GN=Hdac1 PE=1 SV=1                                     | 1.000 | 1.035 | 1.017 | 0.782 | 0.826 | 1.250 |
| Glutathione S-transferase omega-1 OS=Mus musculus GN=Gsto1 PE=1 SV=2                         | 1.084 | 1.050 | 1.067 | 2.248 | 2.506 | 2.221 |
| Lysosomal alpha-mannosidase OS=Mus musculus GN=Man2b1 PE=1 SV=4                              | 1.089 | 1.128 | 1.109 | 0.908 | 0.888 | 0.991 |
| Calsequestrin-2 OS=Mus musculus GN=Casq2 PE=1 SV=3                                           | 1.000 | 1.301 | 1.151 | 0.321 | 0.581 | 0.350 |
| Extracellular superoxide dismutase [Cu-Zn] OS=Mus musculus GN=Sod3 PE=1 SV=1                 | 1.068 | 1.181 | 1.125 | 2.540 | 2.909 | 2.113 |
| Glutamate--cysteine ligase regulatory subunit OS=Mus musculus GN=Gclm PE=1 SV=1              | 0.957 | 0.941 | 0.949 | 1.042 | 1.243 | 1.345 |
| Dihydropyrimidinase-related protein 4 OS=Mus musculus GN=Dpysl4 PE=1 SV=1                    | 1.000 | 1.285 | 1.142 | 1.604 | 1.467 | 2.139 |
| Prohibitin-2 OS=Mus musculus GN=Phb2 PE=1 SV=1                                               | 1.000 | 1.161 | 1.080 | 0.460 | 0.436 | 1.356 |
| D-dopachrome decarboxylase OS=Mus musculus GN=Ddt PE=1 SV=3                                  | 0.996 | 1.131 | 1.064 | 1.054 | 0.869 | 1.429 |
| 26S proteasome non-ATPase regulatory subunit 4 OS=Mus musculus GN=Psm4 PE=1 SV=1             | 1.000 | 1.106 | 1.053 | 1.266 | 1.899 | 1.300 |
| Pre-mRNA-splicing factor ATP-dependent RNA helicase DHX15 OS=Mus musculus GN=Dhx15 PE=1 SV=2 | 1.000 | 0.970 | 0.985 | 1.150 | 0.952 | 1.036 |
| Serine/arginine-rich splicing factor 5 OS=Mus                                                | 1.000 | 1.005 | 1.002 | 0.510 | 0.757 | 1.091 |

|                                                                                                          |       |       |       |       |       |       |
|----------------------------------------------------------------------------------------------------------|-------|-------|-------|-------|-------|-------|
| <b>musculus GN=Srsf5 PE=1 SV=2</b>                                                                       |       |       |       |       |       |       |
| <b>Importin subunit alpha-3 OS=Mus musculus GN=Kpna4 PE=1 SV=1</b>                                       | 1.018 | 1.104 | 1.061 | 1.392 | 1.390 | 1.406 |
| <b>Importin subunit alpha-4 OS=Mus musculus GN=Kpna3 PE=1 SV=1</b>                                       | 1.000 | 1.036 | 1.018 | 0.840 | 1.051 | 1.111 |
| <b>Calpain-1 catalytic subunit OS=Mus musculus GN=Capn1 PE=1 SV=1</b>                                    | 1.000 | 1.286 | 1.143 | 0.843 | 0.813 | 1.269 |
| <b>Acidic leucine-rich nuclear phosphoprotein 32 family member A OS=Mus musculus GN=Anp32a PE=1 SV=1</b> | 1.061 | 1.073 | 1.067 | 1.564 | 1.724 | 1.654 |
| <b>26S proteasome non-ATPase regulatory subunit 14 OS=Mus musculus GN=Psm14 PE=1 SV=2</b>                | 1.000 | 1.026 | 1.013 | 0.995 | 0.797 | 1.080 |
| <b>Cohesin subunit SA-2 OS=Mus musculus GN=Stag2 PE=1 SV=3</b>                                           | 1.000 | 1.015 | 1.008 | 1.177 | 0.705 | 1.169 |
| <b>Annexin A3 OS=Mus musculus GN=Anxa3 PE=1 SV=4</b>                                                     | 1.002 | 0.938 | 0.970 | 0.822 | 0.867 | 0.839 |
| <b>AP-1 complex subunit beta-1 OS=Mus musculus GN=Ap1b1 PE=1 SV=2</b>                                    | 1.000 | 0.866 | 0.933 | 1.027 | 0.995 | 1.047 |
| <b>Interferon alpha/beta receptor 2 OS=Mus musculus GN=Ifnar2 PE=1 SV=2</b>                              | 0.975 | 1.124 | 1.049 | 0.918 | 0.710 | 0.968 |
| <b>Myeloid-associated differentiation marker OS=Mus musculus GN=Myadm PE=1 SV=2</b>                      | 1.000 | 0.812 | 0.906 | 0.507 | 0.493 | 1.011 |
| <b>Nuclear migration protein nudC OS=Mus musculus GN=Nudc PE=1 SV=1</b>                                  | 1.001 | 1.069 | 1.035 | 1.482 | 1.562 | 1.562 |
| <b>Heterogeneous nuclear ribonucleoprotein H OS=Mus musculus GN=Hnnp1 PE=1 SV=3</b>                      | 1.000 | 0.973 | 0.987 | 1.340 | 1.552 | 1.255 |
| <b>Apoptosis inhibitor 5 OS=Mus musculus GN=Api5 PE=1 SV=2</b>                                           | 1.127 | 1.160 | 1.143 | 1.773 | 1.589 | 1.855 |
| <b>Calumenin OS=Mus musculus GN=Calu PE=1 SV=1</b>                                                       | 1.024 | 1.014 | 1.019 | 0.604 | 0.729 | 0.558 |
| <b>Frataxin, mitochondrial OS=Mus musculus GN=Fxn PE=1 SV=1</b>                                          | 1.000 | 1.099 | 1.050 | 1.608 | 1.555 | 2.333 |
| <b>Syndecan-4 OS=Mus musculus GN=Sdc4 PE=1 SV=1</b>                                                      | 1.067 | 1.269 | 1.168 | 0.591 | 0.728 | 0.663 |
| <b>Polymerase I and transcript release factor OS=Mus musculus GN=Ptrf PE=1 SV=1</b>                      | 1.034 | 1.038 | 1.036 | 0.765 | 0.886 | 0.777 |
| <b>AP-3 complex subunit delta-1 OS=Mus musculus GN=Ap3d1 PE=1 SV=1</b>                                   | 1.000 | 1.264 | 1.132 | 1.644 | 0.746 | 0.929 |
| <b>WNT1-inducible-signaling pathway protein 1 OS=Mus musculus GN=Wisp1 PE=2 SV=1</b>                     | 1.000 | 1.048 | 1.024 | 0.667 | 0.762 | 1.052 |
| <b>Bystin OS=Mus musculus GN=Bysl PE=1 SV=3</b>                                                          | 0.967 | 1.011 | 0.989 | 1.204 | 0.336 | 1.455 |
| <b>High mobility group protein B3 OS=Mus musculus GN=Hmgb3 PE=1 SV=3</b>                                 | 1.000 | 1.165 | 1.082 | 2.483 | 2.728 | 2.626 |
| <b>A-kinase anchor protein 2 OS=Mus musculus GN=Akap2 PE=1 SV=3</b>                                      | 1.000 | 1.093 | 1.047 | 0.836 | 0.792 | 0.865 |
| <b>Barrier-to-autointegration factor OS=Mus musculus GN=Banf1 PE=1 SV=1</b>                              | 1.042 | 0.944 | 0.993 | 0.980 | 1.221 | 1.239 |
| <b>STE20-like serine/threonine-protein kinase OS=Mus musculus GN=Slk PE=1 SV=2</b>                       | 1.030 | 1.054 | 1.042 | 1.271 | 1.631 | 1.260 |
| <b>Inositol monophosphatase 1 OS=Mus musculus GN=Impa1 PE=1 SV=1</b>                                     | 1.066 | 0.960 | 1.013 | 1.112 | 1.172 | 1.121 |
| <b>Coatamer subunit beta' OS=Mus musculus GN=Copb2 PE=1 SV=2</b>                                         | 1.023 | 0.969 | 0.996 | 1.029 | 1.030 | 1.014 |
| <b>Septin-7 OS=Mus musculus GN=Sept7 PE=1 SV=1</b>                                                       | 1.036 | 1.158 | 1.097 | 0.995 | 1.388 | 1.174 |
| <b>Eukaryotic translation initiation factor 6 OS=Mus musculus GN=Eif6 PE=1 SV=2</b>                      | 0.973 | 1.019 | 0.996 | 1.129 | 1.251 | 1.125 |
| <b>Stanniocalcin-1 OS=Mus musculus GN=Stc1 PE=2 SV=1</b>                                                 | 1.112 | 1.071 | 1.091 | 1.034 | 0.805 | 1.185 |
| <b>Transcription elongation factor SPT5 OS=Mus musculus GN=Supt5h PE=1 SV=1</b>                          | 1.000 | 0.859 | 0.930 | 1.106 | 0.778 | 1.205 |
| <b>Proteasome subunit beta type-5 OS=Mus musculus GN=Psm5 PE=1 SV=3</b>                                  | 0.971 | 0.962 | 0.966 | 1.090 | 1.116 | 1.323 |

|                                                                                                           |       |       |       |       |       |       |
|-----------------------------------------------------------------------------------------------------------|-------|-------|-------|-------|-------|-------|
| ATP-dependent RNA helicase A OS=Mus musculus<br>GN=Dhx9 PE=1 SV=2                                         | 1.000 | 1.196 | 1.098 | 1.401 | 1.231 | 1.148 |
| Eukaryotic translation initiation factor 3 subunit<br>D OS=Mus musculus GN=Eif3d PE=1 SV=2                | 1.000 | 0.891 | 0.945 | 0.758 | 0.816 | 0.972 |
| Elongation factor 1-beta OS=Mus musculus<br>GN=Eef1b PE=1 SV=5                                            | 0.981 | 0.965 | 0.973 | 1.366 | 1.681 | 1.334 |
| Glycylpeptide N-tetradecanoyltransferase 1<br>OS=Mus musculus GN=Nmt1 PE=1 SV=1                           | 1.000 | 1.375 | 1.188 | 1.142 | 1.174 | 0.817 |
| Gremlin-1 OS=Mus musculus GN=Grem1 PE=2<br>SV=1                                                           | 1.000 | 0.983 | 0.991 | 1.267 | 1.376 | 0.928 |
| PDZ and LIM domain protein 1 OS=Mus musculus<br>GN=Pdlm1 PE=1 SV=4                                        | 1.000 | 1.034 | 1.017 | 1.410 | 1.216 | 1.305 |
| Proteasome subunit alpha type-3 OS=Mus<br>musculus GN=Psma3 PE=1 SV=3                                     | 0.992 | 0.994 | 0.993 | 1.494 | 1.891 | 1.501 |
| Syntaxin-7 OS=Mus musculus GN=Stx7 PE=1 SV=3                                                              | 1.000 | 1.120 | 1.060 | 1.586 | 1.372 | 1.337 |
| Oncostatin-M-specific receptor subunit beta<br>OS=Mus musculus GN=Osmr PE=1 SV=1                          | 1.000 | 0.976 | 0.988 | 0.885 | 0.621 | 1.113 |
| UDP-glucose 6-dehydrogenase OS=Mus musculus<br>GN=Ugdh PE=1 SV=1                                          | 1.089 | 1.112 | 1.100 | 1.280 | 1.307 | 1.317 |
| Sorting nexin-3 OS=Mus musculus GN=Snx3 PE=1<br>SV=3                                                      | 1.000 | 0.921 | 0.960 | 1.284 | 1.036 | 1.143 |
| Sorting nexin-12 OS=Mus musculus GN=Snx12<br>PE=1 SV=1                                                    | 1.000 | 0.912 | 0.956 | 0.839 | 0.713 | 0.705 |
| Prefoldin subunit 2 OS=Mus musculus GN=Pfdn2<br>PE=1 SV=2                                                 | 1.079 | 1.000 | 1.040 | 1.137 | 1.076 | 1.201 |
| E3 ubiquitin-protein ligase TTC3 OS=Mus<br>musculus GN=Ttc3 PE=1 SV=2                                     | 1.042 | 1.004 | 1.023 | 0.975 | 0.787 | 1.206 |
| Collagen alpha-1(V) chain OS=Mus musculus<br>GN=Col5a1 PE=1 SV=2                                          | 1.019 | 0.991 | 1.005 | 0.407 | 0.351 | 0.422 |
| Nidogen-2 OS=Mus musculus GN=Nid2 PE=1 SV=2                                                               | 1.089 | 1.068 | 1.078 | 0.631 | 0.603 | 0.693 |
| WD repeat-containing protein 1 OS=Mus musculus<br>GN=Wdr1 PE=1 SV=3                                       | 1.018 | 1.018 | 1.018 | 1.066 | 1.107 | 0.976 |
| Transforming growth factor beta receptor type 3<br>OS=Mus musculus GN=Tgfb3 PE=1 SV=1                     | 0.963 | 0.986 | 0.975 | 1.252 | 1.197 | 1.509 |
| Calpain small subunit 1 OS=Mus musculus<br>GN=Capns1 PE=1 SV=1                                            | 1.141 | 1.277 | 1.209 | 1.133 | 1.121 | 1.519 |
| Cytoplasmic dynein 1 intermediate chain 2<br>OS=Mus musculus GN=Dync1i2 PE=1 SV=1                         | 0.997 | 1.209 | 1.103 | 2.183 | 1.690 | 1.891 |
| AP-1 complex subunit gamma-like 2 OS=Mus<br>musculus GN=Ap1g2 PE=1 SV=2                                   | 1.000 | 1.114 | 1.057 | 0.447 | 0.392 | 0.488 |
| Palmitoyl-protein thioesterase 1 OS=Mus<br>musculus GN=Ppt1 PE=1 SV=2                                     | 1.000 | 1.125 | 1.062 | 0.965 | 0.991 | 0.951 |
| COP9 signalosome complex subunit 3 OS=Mus<br>musculus GN=Cops3 PE=1 SV=3                                  | 1.000 | 1.046 | 1.023 | 1.127 | 1.231 | 1.325 |
| COP9 signalosome complex subunit 4 OS=Mus<br>musculus GN=Cops4 PE=1 SV=1                                  | 0.966 | 1.093 | 1.030 | 1.067 | 1.292 | 1.171 |
| Heterogeneous nuclear ribonucleoproteins A2/B1<br>OS=Mus musculus GN=Hnrnpa2b1 PE=1 SV=2                  | 1.090 | 1.081 | 1.085 | 1.825 | 1.922 | 1.673 |
| Serine/threonine-protein kinase PAK 1 OS=Mus<br>musculus GN=Pak1 PE=1 SV=1                                | 1.000 | 0.787 | 0.894 | 0.726 | 0.503 | 1.038 |
| 26S protease regulatory subunit 6A OS=Mus<br>musculus GN=Psmc3 PE=1 SV=2                                  | 0.976 | 1.002 | 0.989 | 1.216 | 1.114 | 1.211 |
| ATP-dependent Clp protease proteolytic subunit,<br>mitochondrial OS=Mus musculus GN=Clpp PE=1<br>SV=1     | 1.000 | 1.062 | 1.031 | 1.048 | 1.159 | 1.199 |
| Coagulation factor V OS=Mus musculus GN=F5<br>PE=1 SV=1                                                   | 1.000 | 1.114 | 1.057 | 1.064 | 0.928 | 1.164 |
| Disintegrin and metalloproteinase domain-<br>containing protein 15 OS=Mus musculus<br>GN=Adam15 PE=1 SV=2 | 1.000 | 0.859 | 0.930 | 0.916 | 0.575 | 0.793 |
| Isocitrate dehydrogenase [NADP] cytoplasmic                                                               | 1.008 | 0.913 | 0.960 | 1.330 | 1.252 | 1.241 |



|                                                                                                   |       |       |       |       |       |       |
|---------------------------------------------------------------------------------------------------|-------|-------|-------|-------|-------|-------|
| OS=Mus musculus GN=Idh1 PE=1 SV=2                                                                 |       |       |       |       |       |       |
| Coagulation factor X OS=Mus musculus GN=F10 PE=1 SV=1                                             | 1.000 | 1.024 | 1.012 | 0.855 | 0.748 | 0.973 |
| Protein lin-7 homolog C OS=Mus musculus GN=Lin7c PE=1 SV=2                                        | 1.000 | 0.962 | 0.981 | 0.946 | 1.654 | 1.508 |
| Glucosamine-6-phosphate isomerase 1 OS=Mus musculus GN=Gnpda1 PE=1 SV=3                           | 1.000 | 0.980 | 0.990 | 1.065 | 1.249 | 1.544 |
| Transcobalamin-2 OS=Mus musculus GN=Tcn2 PE=1 SV=1                                                | 1.000 | 0.916 | 0.958 | 0.595 | 0.491 | 0.541 |
| Alpha-actinin-3 OS=Mus musculus GN=Actn3 PE=2 SV=1                                                | 1.000 | 0.992 | 0.996 | 0.773 | 0.867 | 1.185 |
| Legumain OS=Mus musculus GN=Lgmn PE=1 SV=1                                                        | 0.865 | 0.942 | 0.903 | 1.108 | 1.258 | 1.205 |
| Afamin OS=Mus musculus GN=Afm PE=1 SV=2                                                           | 1.000 | 0.872 | 0.936 | 1.001 | 0.615 | 1.322 |
| Tripeptidyl-peptidase 1 OS=Mus musculus GN=Tpp1 PE=1 SV=2                                         | 1.071 | 1.097 | 1.084 | 0.704 | 0.702 | 0.709 |
| Integral membrane protein 2B OS=Mus musculus GN=Itm2b PE=1 SV=1                                   | 1.000 | 0.813 | 0.906 | 0.874 | 0.820 | 0.660 |
| Coatomer subunit epsilon OS=Mus musculus GN=Cope PE=1 SV=3                                        | 0.975 | 0.933 | 0.954 | 1.357 | 0.967 | 1.140 |
| RNA-binding protein 3 OS=Mus musculus GN=Rbm3 PE=1 SV=1                                           | 1.026 | 0.887 | 0.956 | 1.258 | 1.284 | 1.160 |
| Cytochrome b OS=Mus musculus GN=Mt-Cyb PE=1 SV=1                                                  | 1.000 | 1.373 | 1.186 | 1.935 | 0.912 | 0.703 |
| Dihydrofolate reductase OS=Mus musculus GN=Dhfr PE=1 SV=3                                         | 1.000 | 1.348 | 1.174 | 3.270 | 4.792 | 2.876 |
| Hypoxanthine-guanine phosphoribosyltransferase OS=Mus musculus GN=Hprt1 PE=1 SV=3                 | 1.028 | 0.957 | 0.993 | 2.147 | 2.088 | 1.812 |
| Complement C3 OS=Mus musculus GN=C3 PE=1 SV=3                                                     | 0.998 | 0.994 | 0.996 | 1.154 | 1.097 | 1.184 |
| Complement C4-B OS=Mus musculus GN=C4b PE=1 SV=3                                                  | 1.004 | 0.980 | 0.992 | 0.860 | 0.663 | 0.967 |
| Beta-2-microglobulin OS=Mus musculus GN=B2m PE=1 SV=2                                             | 1.031 | 1.011 | 1.021 | 0.939 | 0.672 | 0.885 |
| H-2 class I histocompatibility antigen, alpha chain (Fragment) OS=Mus musculus GN=H2-D1 PE=1 SV=1 | 1.000 | 1.109 | 1.055 | 3.434 | 1.776 | 2.107 |
| H-2 class I histocompatibility antigen, D-B alpha chain OS=Mus musculus GN=H2-D1 PE=1 SV=2        | 0.975 | 0.961 | 0.968 | 0.452 | 0.329 | 0.487 |
| H-2 class I histocompatibility antigen, K-B alpha chain OS=Mus musculus GN=H2-K1 PE=1 SV=1        | 1.040 | 1.161 | 1.101 | 0.817 | 0.714 | 0.958 |
| H-2 class I histocompatibility antigen, K-D alpha chain OS=Mus musculus GN=H2-K1 PE=1 SV=1        | 1.008 | 0.924 | 0.966 | 1.185 | 1.183 | 1.132 |
| Hemoglobin subunit alpha OS=Mus musculus GN=Hba PE=1 SV=2                                         | 1.026 | 1.164 | 1.095 | 1.253 | 1.272 | 1.293 |
| Hemoglobin subunit beta-1 OS=Mus musculus GN=Hbb-b1 PE=1 SV=2                                     | 0.704 | 0.787 | 0.745 | 0.606 | 0.508 | 0.605 |
| Collagen alpha-1(IV) chain OS=Mus musculus GN=Col4a1 PE=1 SV=4                                    | 0.937 | 0.994 | 0.965 | 0.358 | 0.292 | 0.473 |
| Laminin subunit gamma-1 OS=Mus musculus GN=Lamc1 PE=1 SV=2                                        | 1.009 | 1.037 | 1.023 | 0.417 | 0.325 | 0.422 |
| Laminin subunit beta-1 OS=Mus musculus GN=Lamb1 PE=1 SV=3                                         | 0.998 | 1.053 | 1.026 | 0.480 | 0.399 | 0.518 |
| Keratin, type I cytoskeletal 10 OS=Mus musculus GN=Krt10 PE=1 SV=3                                | 0.925 | 0.733 | 0.829 | 0.459 | 0.446 | 0.469 |
| Adenosine deaminase OS=Mus musculus GN=Ada PE=1 SV=3                                              | 1.000 | 1.483 | 1.241 | 2.980 | 2.023 | 2.923 |
| Keratin, type II cytoskeletal 1 OS=Mus musculus GN=Krt1 PE=1 SV=4                                 | 0.975 | 0.725 | 0.850 | 0.370 | 0.301 | 0.423 |
| Fatty acid-binding protein, adipocyte OS=Mus musculus GN=Fabp4 PE=1 SV=3                          | 1.000 | 1.028 | 1.014 | 1.004 | 0.902 | 1.006 |
| Complement factor B OS=Mus musculus GN=Cfb                                                        | 1.064 | 1.099 | 1.082 | 0.816 | 0.628 | 0.870 |

|                                                                                                                |       |       |       |       |       |       |
|----------------------------------------------------------------------------------------------------------------|-------|-------|-------|-------|-------|-------|
| PE=1 SV=2                                                                                                      |       |       |       |       |       |       |
| Myoglobin OS=Mus musculus GN=Mb PE=1 SV=3                                                                      | 1.000 | 1.569 | 1.284 | 0.669 | 0.370 | 0.899 |
| Prolactin-2C3 OS=Mus musculus GN=Pr12c3 PE=1 SV=2                                                              | 0.954 | 0.961 | 0.958 | 1.468 | 1.947 | 1.596 |
| Serum amyloid A-3 protein OS=Mus musculus GN=Saa3 PE=1 SV=1                                                    | 1.255 | 1.264 | 1.260 | 3.199 | 4.324 | 2.834 |
| Major prion protein OS=Mus musculus GN=Prnp PE=1 SV=2                                                          | 1.000 | 1.099 | 1.049 | 1.056 | 0.601 | 0.847 |
| Fructose-bisphosphate aldolase A OS=Mus musculus GN=Aldoa PE=1 SV=2                                            | 1.008 | 0.986 | 0.997 | 1.569 | 1.484 | 1.423 |
| Natriuretic peptides A OS=Mus musculus GN=Nppa PE=1 SV=2                                                       | 1.000 | 0.935 | 0.967 | 0.170 | 0.082 | 0.162 |
| cAMP-dependent protein kinase catalytic subunit alpha OS=Mus musculus GN=Prkaca PE=1 SV=3                      | 1.000 | 1.000 | 1.000 | 1.392 | 1.421 | 1.360 |
| Aspartate aminotransferase, cytoplasmic OS=Mus musculus GN=Got1 PE=1 SV=3                                      | 0.934 | 1.103 | 1.019 | 1.218 | 1.142 | 1.195 |
| Aspartate aminotransferase, mitochondrial OS=Mus musculus GN=Got2 PE=1 SV=1                                    | 1.044 | 1.071 | 1.057 | 0.740 | 1.193 | 0.692 |
| Tubulin alpha-1B chain OS=Mus musculus GN=Tuba1b PE=1 SV=2                                                     | 0.913 | 0.949 | 0.931 | 1.194 | 1.421 | 1.320 |
| L-lactate dehydrogenase A chain OS=Mus musculus GN=Ldha PE=1 SV=3                                              | 1.089 | 1.162 | 1.126 | 2.834 | 3.610 | 2.566 |
| Glucose-6-phosphate isomerase OS=Mus musculus GN=Gpi PE=1 SV=4                                                 | 1.149 | 1.182 | 1.166 | 1.719 | 1.888 | 1.459 |
| Cathepsin L1 OS=Mus musculus GN=Ctsl PE=1 SV=2                                                                 | 1.017 | 0.953 | 0.985 | 0.661 | 0.595 | 0.616 |
| NADP-dependent malic enzyme OS=Mus musculus GN=Me1 PE=1 SV=2                                                   | 1.012 | 1.090 | 1.051 | 1.346 | 1.566 | 1.420 |
| Urokinase-type plasminogen activator OS=Mus musculus GN=Plau PE=1 SV=1                                         | 1.000 | 0.844 | 0.922 | 0.923 | 0.837 | 0.875 |
| Complement factor H OS=Mus musculus GN=Cfh PE=1 SV=2                                                           | 1.065 | 1.142 | 1.104 | 0.736 | 0.703 | 0.779 |
| Protein S100-A4 OS=Mus musculus GN=S100a4 PE=1 SV=1                                                            | 1.000 | 1.052 | 1.026 | 1.568 | 2.223 | 1.371 |
| Macrophage colony-stimulating factor 1 OS=Mus musculus GN=Csf1 PE=1 SV=2                                       | 1.141 | 1.147 | 1.144 | 0.276 | 0.313 | 0.263 |
| SPARC OS=Mus musculus GN=Sparc PE=1 SV=1                                                                       | 1.051 | 0.978 | 1.014 | 0.370 | 0.326 | 0.375 |
| Annexin A2 OS=Mus musculus GN=Anxa2 PE=1 SV=2                                                                  | 1.090 | 1.122 | 1.106 | 0.797 | 1.078 | 0.945 |
| Thymidylate synthase OS=Mus musculus GN=Tyms PE=1 SV=1                                                         | 1.000 | 0.942 | 0.971 | 1.255 | 1.256 | 1.047 |
| Serum albumin OS=Mus musculus GN=Alb PE=1 SV=3                                                                 | 0.894 | 0.827 | 0.860 | 0.869 | 0.511 | 0.926 |
| Heat shock protein HSP 90-alpha OS=Mus musculus GN=Hsp90aa1 PE=1 SV=4                                          | 1.001 | 1.028 | 1.014 | 1.962 | 2.588 | 2.188 |
| Phosphorylase b kinase gamma catalytic chain, skeletal muscle/heart isoform OS=Mus musculus GN=Phkg1 PE=1 SV=3 | 1.000 | 1.053 | 1.026 | 1.038 | 1.013 | 1.240 |
| Protein disulfide-isomerase A4 OS=Mus musculus GN=Pdia4 PE=1 SV=3                                              | 0.996 | 0.917 | 0.957 | 1.051 | 0.872 | 1.111 |
| Endoplasmic reticulum chaperone protein OS=Mus musculus GN=Hsp90b1 PE=1 SV=2                                   | 1.070 | 1.043 | 1.056 | 1.007 | 0.840 | 0.971 |
| Collagen alpha-1(III) chain OS=Mus musculus GN=Col3a1 PE=1 SV=4                                                | 1.000 | 1.022 | 1.011 | 0.555 | 0.469 | 0.524 |
| Collagen alpha-2(IV) chain OS=Mus musculus GN=Col4a2 PE=1 SV=4                                                 | 1.017 | 1.011 | 1.014 | 0.311 | 0.248 | 0.338 |
| Protein S100-A10 OS=Mus musculus GN=S100a10 PE=1 SV=2                                                          | 1.000 | 1.095 | 1.047 | 0.901 | 1.151 | 1.037 |
| Apolipoprotein E OS=Mus musculus GN=Apoe PE=1 SV=2                                                             | 1.000 | 1.059 | 1.030 | 0.713 | 0.584 | 0.692 |
| Superoxide dismutase [Cu-Zn] OS=Mus musculus                                                                   | 0.952 | 0.984 | 0.968 | 1.510 | 1.530 | 1.285 |

|                                                                                               |       |       |       |       |       |       |
|-----------------------------------------------------------------------------------------------|-------|-------|-------|-------|-------|-------|
| GN=Sod1 PE=1 SV=2                                                                             |       |       |       |       |       |       |
| Malate dehydrogenase, mitochondrial OS=Mus musculus GN=Mdh2 PE=1 SV=3                         | 1.016 | 0.985 | 1.001 | 0.713 | 0.889 | 0.635 |
| Interleukin-6 OS=Mus musculus GN=Il6 PE=1 SV=1                                                | 1.000 | 0.948 | 0.974 | 0.935 | 0.936 | 0.844 |
| Guanine nucleotide-binding protein G(i) subunit alpha-2 OS=Mus musculus GN=Gnai2 PE=1 SV=5    | 1.000 | 1.460 | 1.230 | 1.025 | 1.264 | 1.241 |
| Lysozyme C-2 OS=Mus musculus GN=Lyz2 PE=1 SV=2                                                | 1.000 | 0.878 | 0.939 | 0.222 | 0.156 | 0.197 |
| Integrin beta-1 OS=Mus musculus GN=Itgb1 PE=1 SV=1                                            | 1.000 | 0.920 | 0.960 | 0.814 | 0.872 | 0.694 |
| Leukemia inhibitory factor OS=Mus musculus GN=Lif PE=1 SV=1                                   | 1.000 | 0.878 | 0.939 | 0.678 | 0.495 | 1.029 |
| Protein disulfide-isomerase OS=Mus musculus GN=P4hb PE=1 SV=2                                 | 1.083 | 1.111 | 1.097 | 1.000 | 1.185 | 0.894 |
| Nucleolin OS=Mus musculus GN=Ncl PE=1 SV=2                                                    | 1.084 | 1.003 | 1.043 | 1.655 | 1.844 | 1.548 |
| Phosphoglycerate kinase 1 OS=Mus musculus GN=Pgk1 PE=1 SV=4                                   | 0.986 | 1.012 | 0.999 | 1.934 | 2.334 | 1.927 |
| Ferritin heavy chain OS=Mus musculus GN=Fth1 PE=1 SV=2                                        | 1.030 | 1.131 | 1.081 | 1.500 | 2.035 | 1.858 |
| Insulin-like growth factor II OS=Mus musculus GN=Igfb2 PE=1 SV=1                              | 1.000 | 0.855 | 0.928 | 0.460 | 0.268 | 0.467 |
| Superoxide dismutase [Mn], mitochondrial OS=Mus musculus GN=Sod2 PE=1 SV=3                    | 0.994 | 0.985 | 0.989 | 0.760 | 1.016 | 0.672 |
| Diphosphoinositol polyphosphate phosphohydrolase 3-alpha OS=Mus musculus GN=Nudt10 PE=1 SV=1  | 1.000 | 1.433 | 1.216 | 1.389 | 1.601 | 2.350 |
| Uncharacterized protein C14orf142 homolog OS=Mus musculus PE=3 SV=1                           | 1.000 | 0.839 | 0.919 | 0.962 | 0.541 | 0.692 |
| Annexin A1 OS=Mus musculus GN=Anxa1 PE=1 SV=2                                                 | 1.126 | 1.238 | 1.182 | 0.586 | 0.748 | 0.653 |
| Elongation factor 1-alpha 1 OS=Mus musculus GN=Eef1a1 PE=1 SV=3                               | 1.023 | 1.030 | 1.027 | 2.305 | 2.697 | 2.590 |
| C-C motif chemokine 2 OS=Mus musculus GN=Ccl2 PE=1 SV=1                                       | 0.993 | 1.040 | 1.017 | 0.389 | 0.382 | 0.394 |
| MLV-related proviral Env polyprotein OS=Mus musculus PE=1 SV=3                                | 1.000 | 0.888 | 0.944 | 0.941 | 1.130 | 0.932 |
| Nidogen-1 OS=Mus musculus GN=Nid1 PE=1 SV=2                                                   | 1.132 | 1.060 | 1.096 | 0.522 | 0.497 | 0.533 |
| Delta-aminolevulinic acid dehydratase OS=Mus musculus GN=Alad PE=1 SV=1                       | 1.000 | 1.512 | 1.256 | 0.711 | 0.577 | 0.896 |
| Cathepsin B OS=Mus musculus GN=Ctsb PE=1 SV=2                                                 | 1.023 | 0.998 | 1.010 | 1.182 | 1.132 | 1.279 |
| Eukaryotic initiation factor 4A-II OS=Mus musculus GN=Eif4a2 PE=1 SV=2                        | 1.000 | 1.142 | 1.071 | 1.795 | 1.640 | 1.647 |
| Thioredoxin OS=Mus musculus GN=Txn PE=1 SV=3                                                  | 1.016 | 0.983 | 0.999 | 1.675 | 1.823 | 1.605 |
| Glutathione S-transferase Mu 1 OS=Mus musculus GN=Gstm1 PE=1 SV=2                             | 1.000 | 1.027 | 1.013 | 1.083 | 0.751 | 0.914 |
| Transcription elongation factor A protein 1 OS=Mus musculus GN=Tcea1 PE=1 SV=2                | 0.992 | 1.025 | 1.009 | 1.662 | 1.633 | 1.498 |
| Monocyte differentiation antigen CD14 OS=Mus musculus GN=Cd14 PE=1 SV=1                       | 1.000 | 1.008 | 1.004 | 0.504 | 0.712 | 0.955 |
| 4F2 cell-surface antigen heavy chain OS=Mus musculus GN=Slc3a2 PE=1 SV=1                      | 1.000 | 1.008 | 1.004 | 0.595 | 0.950 | 0.699 |
| C-X-C motif chemokine 2 OS=Mus musculus GN=Cxcl2 PE=1 SV=2                                    | 1.000 | 1.015 | 1.008 | 0.212 | 0.145 | 0.186 |
| Osteopontin OS=Mus musculus GN=Spp1 PE=1 SV=1                                                 | 1.068 | 0.995 | 1.031 | 4.581 | 4.873 | 4.190 |
| Activated RNA polymerase II transcriptional coactivator p15 OS=Mus musculus GN=Sub1 PE=1 SV=3 | 1.098 | 0.992 | 1.045 | 1.017 | 1.134 | 1.079 |
| Collagen alpha-1(I) chain OS=Mus musculus GN=Col1a1 PE=1 SV=4                                 | 0.920 | 0.910 | 0.915 | 0.558 | 0.491 | 0.506 |

|                                                                                                         |       |       |       |       |        |        |
|---------------------------------------------------------------------------------------------------------|-------|-------|-------|-------|--------|--------|
| Poly [ADP-ribose] polymerase 1 OS=Mus musculus<br>GN=Parp1 PE=1 SV=3                                    | 0.932 | 0.872 | 0.902 | 0.851 | 0.838  | 0.794  |
| Lipoprotein lipase OS=Mus musculus GN=Lpl PE=1<br>SV=3                                                  | 0.992 | 1.090 | 1.041 | 0.951 | 0.782  | 0.981  |
| Tissue-type plasminogen activator OS=Mus<br>musculus GN=Plat PE=1 SV=3                                  | 1.000 | 0.860 | 0.930 | 0.495 | 0.528  | 0.647  |
| Fibronectin OS=Mus musculus GN=Fn1 PE=1 SV=4                                                            | 0.964 | 0.958 | 0.961 | 0.356 | 0.356  | 0.332  |
| Fatty acid-binding protein, heart OS=Mus<br>musculus GN=Fabp3 PE=1 SV=5                                 | 1.000 | 1.209 | 1.104 | 1.210 | 0.580  | 0.833  |
| Lysosome-associated membrane glycoprotein 1<br>OS=Mus musculus GN=Lamp1 PE=1 SV=2                       | 1.224 | 1.335 | 1.280 | 1.003 | 1.451  | 1.214  |
| Cyclin-dependent kinase 1 OS=Mus musculus<br>GN=Cdk1 PE=1 SV=3                                          | 1.000 | 0.924 | 0.962 | 1.364 | 1.187  | 1.142  |
| Heat shock protein HSP 90-beta OS=Mus musculus<br>GN=Hsp90ab1 PE=1 SV=3                                 | 0.971 | 1.002 | 0.987 | 2.297 | 2.457  | 1.916  |
| Neutrophil gelatinase-associated lipocalin<br>OS=Mus musculus GN=Lcn2 PE=1 SV=1                         | 0.958 | 0.969 | 0.963 | 2.798 | 1.897  | 2.618  |
| T-complex protein 1 subunit alpha OS=Mus<br>musculus GN=Tcp1 PE=1 SV=3                                  | 1.079 | 1.089 | 1.084 | 1.324 | 1.200  | 1.219  |
| Amyloid beta A4 protein OS=Mus musculus<br>GN=App PE=1 SV=3                                             | 1.037 | 1.033 | 1.035 | 0.523 | 0.459  | 0.511  |
| Metalloproteinase inhibitor 1 OS=Mus musculus<br>GN=Timp1 PE=1 SV=2                                     | 1.062 | 1.080 | 1.071 | 1.315 | 1.336  | 1.097  |
| ATP-dependent 6-phosphofructokinase, liver type<br>OS=Mus musculus GN=Pfkl PE=1 SV=4                    | 1.000 | 0.857 | 0.929 | 0.755 | 0.675  | 0.844  |
| Plasminogen activator inhibitor 2, macrophage<br>OS=Mus musculus GN=Serpib2 PE=1 SV=1                   | 0.959 | 0.882 | 0.921 | 1.082 | 1.480  | 1.155  |
| cAMP-dependent protein kinase type I-beta<br>regulatory subunit OS=Mus musculus GN=Prkar1b<br>PE=1 SV=2 | 1.000 | 0.893 | 0.947 | 1.179 | 1.101  | 1.634  |
| Growth-regulated alpha protein OS=Mus musculus<br>GN=Cxcl1 PE=1 SV=1                                    | 1.105 | 1.292 | 1.199 | 0.893 | 0.922  | 0.807  |
| Gelsolin OS=Mus musculus GN=Gsn PE=1 SV=3                                                               | 0.973 | 0.972 | 0.973 | 0.936 | 0.923  | 0.999  |
| Neural cell adhesion molecule 1 OS=Mus musculus<br>GN=Ncam1 PE=1 SV=3                                   | 1.037 | 0.923 | 0.980 | 0.943 | 1.253  | 1.217  |
| Intercellular adhesion molecule 1 OS=Mus<br>musculus GN=Icam1 PE=1 SV=1                                 | 1.000 | 1.005 | 1.003 | 0.302 | 0.313  | 0.208  |
| Protein S100-A6 OS=Mus musculus GN=S100a6<br>PE=1 SV=3                                                  | 1.005 | 0.991 | 0.998 | 1.383 | 1.286  | 1.281  |
| 40S ribosomal protein S16 OS=Mus musculus<br>GN=Rps16 PE=1 SV=4                                         | 1.000 | 9.121 | 5.060 | 8.968 | 13.442 | 11.963 |
| Malate dehydrogenase, cytoplasmic OS=Mus<br>musculus GN=Mdh1 PE=1 SV=3                                  | 0.999 | 1.032 | 1.015 | 1.244 | 1.353  | 1.120  |
| 40S ribosomal protein SA OS=Mus musculus<br>GN=Rpsa PE=1 SV=4                                           | 1.017 | 1.101 | 1.059 | 1.419 | 1.419  | 1.442  |
| Calreticulin OS=Mus musculus GN=Calr PE=1 SV=1                                                          | 1.177 | 1.109 | 1.143 | 1.167 | 1.268  | 1.156  |
| H-2 class I histocompatibility antigen, D-K alpha<br>chain OS=Mus musculus GN=H2-D1 PE=1 SV=1           | 1.000 | 0.887 | 0.944 | 0.642 | 0.524  | 0.503  |
| H-2 class I histocompatibility antigen, Q8 alpha<br>chain OS=Mus musculus GN=H2-Q8 PE=3 SV=1            | 1.000 | 0.992 | 0.996 | 0.381 | 0.356  | 0.355  |
| 26S proteasome non-ATPase regulatory subunit 3<br>OS=Mus musculus GN=Psmd3 PE=1 SV=3                    | 0.992 | 1.166 | 1.079 | 1.305 | 1.336  | 1.416  |
| Interleukin-1 receptor-like 1 OS=Mus musculus<br>GN=Il1rl1 PE=1 SV=2                                    | 1.010 | 0.898 | 0.954 | 1.317 | 1.309  | 1.217  |
| Lamin-B1 OS=Mus musculus GN=Lmnbl1 PE=1<br>SV=3                                                         | 0.957 | 1.048 | 1.002 | 1.611 | 1.519  | 1.506  |
| Annexin A6 OS=Mus musculus GN=Anxa6 PE=1<br>SV=3                                                        | 1.000 | 1.013 | 1.006 | 0.711 | 0.789  | 0.721  |
| 60S acidic ribosomal protein P0 OS=Mus musculus<br>GN=Rplp0 PE=1 SV=3                                   | 0.982 | 1.040 | 1.011 | 1.646 | 1.687  | 1.704  |
| Heme oxygenase 1 OS=Mus musculus GN=Hmox1                                                               | 0.999 | 1.134 | 1.066 | 1.015 | 0.946  | 1.149  |

|                                                                                       |       |       |       |       |       |       |
|---------------------------------------------------------------------------------------|-------|-------|-------|-------|-------|-------|
| <b>PE=1 SV=1</b>                                                                      |       |       |       |       |       |       |
| <b>Interferon-activable protein 204 OS=Mus musculus GN=Ifi204 PE=1 SV=2</b>           | 1.000 | 0.801 | 0.900 | 0.360 | 0.748 | 1.011 |
| <b>Cadherin-2 OS=Mus musculus GN=Cdh2 PE=1 SV=2</b>                                   | 0.828 | 0.809 | 0.819 | 0.632 | 0.588 | 0.603 |
| <b>CD44 antigen OS=Mus musculus GN=Cd44 PE=1 SV=3</b>                                 | 1.005 | 1.011 | 1.008 | 1.363 | 1.644 | 1.374 |
| <b>Nucleoside diphosphate kinase A OS=Mus musculus GN=Nme1 PE=1 SV=1</b>              | 1.046 | 0.874 | 0.960 | 1.864 | 2.291 | 1.643 |
| <b>Glutathione S-transferase Mu 2 OS=Mus musculus GN=Gstm2 PE=1 SV=2</b>              | 1.057 | 0.976 | 1.017 | 0.888 | 0.966 | 1.084 |
| <b>Galectin-1 OS=Mus musculus GN=Lgals1 PE=1 SV=3</b>                                 | 1.003 | 1.017 | 1.010 | 1.749 | 1.726 | 1.550 |
| <b>Galectin-3 OS=Mus musculus GN=Lgals3 PE=1 SV=3</b>                                 | 0.997 | 1.047 | 1.022 | 1.589 | 1.833 | 1.429 |
| <b>L-lactate dehydrogenase B chain OS=Mus musculus GN=Ldhd PE=1 SV=2</b>              | 1.007 | 0.953 | 0.980 | 0.935 | 1.028 | 0.795 |
| <b>Putative ATP-dependent RNA helicase Pl10 OS=Mus musculus GN=D1Pas1 PE=1 SV=1</b>   | 1.000 | 0.937 | 0.969 | 0.912 | 0.971 | 1.122 |
| <b>Spectrin alpha chain, non-erythrocytic 1 OS=Mus musculus GN=Sptan1 PE=1 SV=4</b>   | 1.169 | 1.220 | 1.195 | 1.076 | 1.059 | 1.130 |
| <b>Heat shock 70 kDa protein 1-like OS=Mus musculus GN=Hspa1l PE=1 SV=4</b>           | 1.000 | 1.086 | 1.043 | 1.147 | 1.065 | 1.106 |
| <b>Lysosomal protective protein OS=Mus musculus GN=Ctsa PE=1 SV=1</b>                 | 0.958 | 1.078 | 1.018 | 0.793 | 0.762 | 0.913 |
| <b>Glyceraldehyde-3-phosphate dehydrogenase OS=Mus musculus GN=Gapdh PE=1 SV=2</b>    | 0.934 | 1.036 | 0.985 | 2.565 | 2.690 | 2.495 |
| <b>Lysosome-associated membrane glycoprotein 2 OS=Mus musculus GN=Lamp2 PE=1 SV=2</b> | 1.024 | 1.041 | 1.033 | 0.641 | 1.101 | 0.710 |
| <b>High mobility group protein HMG-I/HMG-Y OS=Mus musculus GN=Hmga1 PE=1 SV=4</b>     | 0.830 | 0.864 | 0.847 | 5.460 | 6.793 | 4.577 |
| <b>Alpha-enolase OS=Mus musculus GN=Eno1 PE=1 SV=3</b>                                | 1.054 | 0.985 | 1.020 | 2.065 | 2.200 | 2.103 |
| <b>Gamma-enolase OS=Mus musculus GN=Eno2 PE=1 SV=2</b>                                | 1.038 | 0.943 | 0.991 | 1.155 | 0.819 | 1.021 |
| <b>Polypyrimidine tract-binding protein 1 OS=Mus musculus GN=Pthp1 PE=1 SV=2</b>      | 0.928 | 0.956 | 0.942 | 1.861 | 2.256 | 1.705 |
| <b>AP-2 complex subunit alpha-1 OS=Mus musculus GN=Ap2a1 PE=1 SV=1</b>                | 1.000 | 1.073 | 1.036 | 1.639 | 2.577 | 2.667 |
| <b>AP-2 complex subunit alpha-2 OS=Mus musculus GN=Ap2a2 PE=1 SV=2</b>                | 1.000 | 1.088 | 1.044 | 1.065 | 1.075 | 1.088 |
| <b>Glucosylceramidase OS=Mus musculus GN=Gba PE=1 SV=1</b>                            | 0.996 | 0.965 | 0.980 | 1.234 | 1.482 | 1.292 |
| <b>C-X-C motif chemokine 10 OS=Mus musculus GN=Cxcl10 PE=1 SV=1</b>                   | 1.091 | 1.144 | 1.117 | 0.392 | 0.351 | 0.418 |
| <b>Hexokinase-1 OS=Mus musculus GN=Hk1 PE=1 SV=3</b>                                  | 1.000 | 0.930 | 0.965 | 1.054 | 0.911 | 1.196 |
| <b>Peptidyl-prolyl cis-trans isomerase A OS=Mus musculus GN=Ppia PE=1 SV=2</b>        | 1.139 | 1.084 | 1.112 | 1.975 | 2.008 | 1.768 |
| <b>Triosephosphate isomerase OS=Mus musculus GN=Tpi1 PE=1 SV=4</b>                    | 0.994 | 0.981 | 0.987 | 2.128 | 2.545 | 1.749 |
| <b>Heat shock 70 kDa protein 1B OS=Mus musculus GN=Hspa1b PE=1 SV=3</b>               | 1.016 | 1.036 | 1.026 | 1.099 | 1.352 | 1.154 |
| <b>Proliferating cell nuclear antigen OS=Mus musculus GN=Pcna PE=1 SV=2</b>           | 0.870 | 0.895 | 0.882 | 1.795 | 2.136 | 1.680 |
| <b>Cathepsin D OS=Mus musculus GN=Ctsd PE=1 SV=1</b>                                  | 1.027 | 0.997 | 1.012 | 0.779 | 0.640 | 0.783 |
| <b>Protein CYR61 OS=Mus musculus GN=Cyr61 PE=1 SV=1</b>                               | 1.024 | 1.053 | 1.038 | 0.865 | 1.060 | 1.040 |
| <b>Cofilin-1 OS=Mus musculus GN=Cfl1 PE=1 SV=3</b>                                    | 0.954 | 0.921 | 0.937 | 2.032 | 2.550 | 1.913 |
| <b>Fatty acid synthase OS=Mus musculus GN=Fasn</b>                                    | 0.995 | 0.948 | 0.972 | 1.184 | 1.164 | 1.219 |

|                                                             |       |       |       |       |       |       |
|-------------------------------------------------------------|-------|-------|-------|-------|-------|-------|
| <b>PE=1 SV=2</b>                                            |       |       |       |       |       |       |
| <b>Troponin C, slow skeletal and cardiac muscles</b>        | 1.000 | 2.028 | 1.514 | 0.774 | 0.540 | 0.463 |
| <b>OS=Mus musculus GN=Tnni1 PE=1 SV=1</b>                   |       |       |       |       |       |       |
| <b>Glutathione S-transferase P 1 OS=Mus musculus</b>        | 0.940 | 0.984 | 0.962 | 1.523 | 1.327 | 1.452 |
| <b>GN=Gstp1 PE=1 SV=2</b>                                   |       |       |       |       |       |       |
| <b>Serpin H1 OS=Mus musculus GN=Serpinh1 PE=1</b>           | 0.975 | 1.137 | 1.056 | 0.788 | 0.773 | 0.696 |
| <b>SV=3</b>                                                 |       |       |       |       |       |       |
| <b>Negative elongation factor E OS=Mus musculus</b>         | 1.000 | 1.588 | 1.294 | 2.807 | 1.911 | 1.527 |
| <b>GN=Nelfe PE=1 SV=2</b>                                   |       |       |       |       |       |       |
| <b>78 kDa glucose-regulated protein OS=Mus</b>              | 1.098 | 1.032 | 1.065 | 0.971 | 0.868 | 0.933 |
| <b>musculus GN=Hspa5 PE=1 SV=3</b>                          |       |       |       |       |       |       |
| <b>Beta-hexosaminidase subunit beta OS=Mus</b>              | 1.000 | 0.934 | 0.967 | 0.693 | 0.886 | 0.968 |
| <b>musculus GN=Hexb PE=1 SV=2</b>                           |       |       |       |       |       |       |
| <b>Thymosin beta-4 OS=Mus musculus GN=Tmsb4x</b>            | 1.000 | 1.380 | 1.190 | 2.132 | 0.958 | 2.251 |
| <b>PE=1 SV=1</b>                                            |       |       |       |       |       |       |
| <b>Vimentin OS=Mus musculus GN=Vim PE=1 SV=3</b>            | 0.956 | 1.073 | 1.015 | 1.039 | 1.466 | 1.047 |
| <b>Tropomyosin alpha-3 chain OS=Mus musculus</b>            | 1.010 | 1.005 | 1.008 | 1.275 | 1.425 | 1.173 |
| <b>GN=Tpm3 PE=1 SV=3</b>                                    |       |       |       |       |       |       |
| <b>Ubiquitin-like protein 4A OS=Mus musculus</b>            | 1.000 | 0.755 | 0.877 | 0.571 | 1.011 | 0.916 |
| <b>GN=Ubl4a PE=1 SV=1</b>                                   |       |       |       |       |       |       |
| <b>Cystatin-C OS=Mus musculus GN=Cst3 PE=1 SV=2</b>         | 1.111 | 1.076 | 1.093 | 1.044 | 0.938 | 1.109 |
| <b>Beta-enolase OS=Mus musculus GN=Eno3 PE=1</b>            | 0.996 | 0.893 | 0.945 | 1.130 | 1.314 | 1.018 |
| <b>SV=3</b>                                                 |       |       |       |       |       |       |
| <b>Lamin-B2 OS=Mus musculus GN=Lmnb2 PE=1</b>               | 1.000 | 0.909 | 0.955 | 0.700 | 1.069 | 0.762 |
| <b>SV=2</b>                                                 |       |       |       |       |       |       |
| <b>Lactadherin OS=Mus musculus GN=Mfge8 PE=1</b>            | 0.951 | 1.014 | 0.983 | 0.676 | 0.662 | 0.613 |
| <b>SV=3</b>                                                 |       |       |       |       |       |       |
| <b>Histone H2A type 1 OS=Mus musculus</b>                   | 1.000 | 0.995 | 0.998 | 0.354 | 0.603 | 0.333 |
| <b>GN=Hist1h2ab PE=1 SV=3</b>                               |       |       |       |       |       |       |
| <b>Plasminogen activator inhibitor 1 OS=Mus</b>             | 1.055 | 1.174 | 1.115 | 0.381 | 0.338 | 0.363 |
| <b>musculus GN=Serpine1 PE=1 SV=1</b>                       |       |       |       |       |       |       |
| <b>AP-1 complex subunit gamma-1 OS=Mus musculus</b>         | 1.000 | 0.864 | 0.932 | 1.080 | 1.041 | 0.744 |
| <b>GN=Ap1g1 PE=1 SV=3</b>                                   |       |       |       |       |       |       |
| <b>Eukaryotic translation initiation factor 3 subunit A</b> | 1.018 | 1.108 | 1.063 | 1.532 | 1.400 | 1.510 |
| <b>OS=Mus musculus GN=Elf3a PE=1 SV=5</b>                   |       |       |       |       |       |       |
| <b>Chromobox protein homolog 3 OS=Mus musculus</b>          | 0.959 | 0.924 | 0.942 | 2.006 | 2.205 | 1.797 |
| <b>GN=Cbx3 PE=1 SV=2</b>                                    |       |       |       |       |       |       |
| <b>Putative helicase MOV-10 OS=Mus musculus</b>             | 0.878 | 1.129 | 1.003 | 1.414 | 1.448 | 1.480 |
| <b>GN=Mov10 PE=1 SV=2</b>                                   |       |       |       |       |       |       |
| <b>Purine nucleoside phosphorylase OS=Mus</b>               | 1.091 | 0.921 | 1.006 | 0.893 | 0.625 | 0.703 |
| <b>musculus GN=Pnp PE=1 SV=2</b>                            |       |       |       |       |       |       |
| <b>Protein-L-isoaspartate(D-aspartate) O-</b>               | 1.051 | 1.107 | 1.079 | 1.084 | 1.118 | 1.347 |
| <b>methyltransferase OS=Mus musculus GN=Pcmt1</b>           |       |       |       |       |       |       |
| <b>PE=1 SV=3</b>                                            |       |       |       |       |       |       |
| <b>GDP-L-fucose synthase OS=Mus musculus</b>                | 1.000 | 0.846 | 0.923 | 0.822 | 0.763 | 0.866 |
| <b>GN=Tsta3 PE=1 SV=3</b>                                   |       |       |       |       |       |       |
| <b>Beta-galactosidase OS=Mus musculus GN=Glb1</b>           | 1.000 | 1.044 | 1.022 | 0.975 | 0.797 | 0.962 |
| <b>PE=1 SV=1</b>                                            |       |       |       |       |       |       |
| <b>Branched-chain-amino-acid aminotransferase,</b>          | 0.941 | 0.888 | 0.915 | 1.659 | 1.317 | 1.302 |
| <b>cytosolic OS=Mus musculus GN=Bcat1 PE=1 SV=2</b>         |       |       |       |       |       |       |
| <b>Peptidyl-prolyl cis-trans isomerase B OS=Mus</b>         | 1.109 | 1.150 | 1.130 | 1.568 | 1.422 | 1.440 |
| <b>musculus GN=Ppib PE=1 SV=2</b>                           |       |       |       |       |       |       |
| <b>Macrophage-capping protein OS=Mus musculus</b>           | 1.234 | 1.285 | 1.260 | 1.910 | 1.798 | 1.829 |
| <b>GN=Capg PE=1 SV=2</b>                                    |       |       |       |       |       |       |
| <b>Glutathione S-transferase A4 OS=Mus musculus</b>         | 1.000 | 0.918 | 0.959 | 1.578 | 1.038 | 1.638 |
| <b>GN=Gsta4 PE=1 SV=3</b>                                   |       |       |       |       |       |       |
| <b>Leukotriene A-4 hydrolase OS=Mus musculus</b>            | 0.939 | 0.879 | 0.909 | 1.041 | 1.145 | 1.013 |
| <b>GN=Lta4h PE=1 SV=4</b>                                   |       |       |       |       |       |       |
| <b>Inosine-5'-monophosphate dehydrogenase 2</b>             | 1.000 | 1.033 | 1.016 | 1.447 | 1.554 | 1.624 |
| <b>OS=Mus musculus GN=Impdh2 PE=1 SV=2</b>                  |       |       |       |       |       |       |
| <b>Cyclin-dependent kinase 11B OS=Mus musculus</b>          | 1.035 | 0.833 | 0.934 | 0.994 | 1.053 | 0.938 |

|                                                                                   |       |       |       |       |       |       |
|-----------------------------------------------------------------------------------|-------|-------|-------|-------|-------|-------|
| GN=Cdk11b PE=1 SV=2                                                               |       |       |       |       |       |       |
| DNA replication licensing factor MCM3 OS=Mus musculus GN=Mcm3 PE=1 SV=2           | 1.000 | 1.007 | 1.003 | 0.827 | 0.834 | 1.060 |
| 40S ribosomal protein S2 OS=Mus musculus GN=Rps2 PE=1 SV=3                        | 1.000 | 1.105 | 1.053 | 0.875 | 0.856 | 1.049 |
| Metalloproteinase inhibitor 2 OS=Mus musculus GN=Timp2 PE=1 SV=2                  | 1.034 | 0.977 | 1.005 | 1.726 | 1.221 | 1.210 |
| Talin-1 OS=Mus musculus GN=Tln1 PE=1 SV=2                                         | 1.117 | 1.097 | 1.107 | 1.528 | 1.584 | 1.443 |
| Ezrin OS=Mus musculus GN=Ezr PE=1 SV=3                                            | 0.981 | 0.932 | 0.957 | 1.200 | 1.121 | 1.139 |
| Moesin OS=Mus musculus GN=Msn PE=1 SV=3                                           | 1.202 | 1.197 | 1.200 | 1.917 | 2.202 | 1.704 |
| Radixin OS=Mus musculus GN=Rdx PE=1 SV=3                                          | 0.975 | 0.945 | 0.960 | 1.223 | 1.191 | 1.321 |
| Catenin alpha-1 OS=Mus musculus GN=Ctnna1 PE=1 SV=1                               | 0.891 | 1.361 | 1.126 | 2.151 | 2.090 | 2.963 |
| Prothymosin alpha OS=Mus musculus GN=Ptma PE=1 SV=2                               | 1.000 | 1.052 | 1.026 | 0.588 | 0.843 | 0.658 |
| Splicing factor U2AF 65 kDa subunit OS=Mus musculus GN=U2af2 PE=1 SV=3            | 0.997 | 0.913 | 0.955 | 1.254 | 1.273 | 1.274 |
| Glutamate dehydrogenase 1, mitochondrial OS=Mus musculus GN=Glud1 PE=1 SV=1       | 1.044 | 1.077 | 1.061 | 0.794 | 0.973 | 0.737 |
| 26S proteasome non-ATPase regulatory subunit 7 OS=Mus musculus GN=Psmc7 PE=1 SV=2 | 0.994 | 1.006 | 1.000 | 1.110 | 0.956 | 1.173 |
| Platelet-derived growth factor receptor alpha OS=Mus musculus GN=Pdgfra PE=1 SV=3 | 1.000 | 0.830 | 0.915 | 0.917 | 0.894 | 0.948 |
| Serine--tRNA ligase, cytoplasmic OS=Mus musculus GN=Sars PE=1 SV=3                | 1.016 | 0.956 | 0.986 | 1.206 | 1.341 | 1.179 |
| Myristoylated alanine-rich C-kinase substrate OS=Mus musculus GN=Marcks PE=1 SV=2 | 1.089 | 1.110 | 1.099 | 0.825 | 1.001 | 0.787 |
| Peptidyl-prolyl cis-trans isomerase FKBP1A OS=Mus musculus GN=Fkbp1a PE=1 SV=2    | 1.018 | 1.042 | 1.030 | 1.346 | 1.242 | 1.416 |
| Alpha-mannosidase 2 OS=Mus musculus GN=Man2a1 PE=1 SV=2                           | 1.129 | 1.087 | 1.108 | 0.818 | 0.774 | 0.879 |
| Microtubule-associated protein 4 OS=Mus musculus GN=Map4 PE=1 SV=3                | 0.952 | 0.942 | 0.947 | 0.893 | 1.000 | 1.056 |
| Phospholipase A-2-activating protein OS=Mus musculus GN=Plaa PE=1 SV=4            | 0.987 | 0.912 | 0.949 | 1.171 | 1.123 | 1.292 |
| 60S ribosomal protein L3 OS=Mus musculus GN=Rpl3 PE=1 SV=3                        | 1.000 | 0.917 | 0.959 | 0.715 | 0.935 | 0.631 |
| Protein disulfide-isomerase A3 OS=Mus musculus GN=Pdia3 PE=1 SV=2                 | 1.116 | 1.006 | 1.061 | 1.131 | 1.049 | 0.977 |
| Protein-lysine 6-oxidase OS=Mus musculus GN=Lox PE=1 SV=1                         | 1.009 | 1.398 | 1.203 | 1.177 | 1.014 | 1.093 |
| DNA-(apurinic or apyrimidinic site) lyase OS=Mus musculus GN=Apex1 PE=1 SV=2      | 1.005 | 1.127 | 1.066 | 2.410 | 2.652 | 2.299 |
| Alcohol dehydrogenase class-3 OS=Mus musculus GN=Adh5 PE=1 SV=3                   | 1.077 | 1.202 | 1.139 | 1.715 | 2.157 | 1.887 |
| Collagen alpha-1(II) chain OS=Mus musculus GN=Col2a1 PE=1 SV=2                    | 1.000 | 0.996 | 0.998 | 0.811 | 0.780 | 0.596 |
| Biglycan OS=Mus musculus GN=Bgn PE=1 SV=1                                         | 0.977 | 0.939 | 0.958 | 0.702 | 0.644 | 0.667 |
| Decorin OS=Mus musculus GN=Dcn PE=1 SV=1                                          | 0.991 | 0.997 | 0.994 | 1.199 | 1.329 | 1.174 |
| Nucleosome assembly protein 1-like 1 OS=Mus musculus GN=Nap1l1 PE=1 SV=2          | 0.862 | 0.981 | 0.921 | 1.881 | 2.159 | 1.544 |
| MARCKS-related protein OS=Mus musculus GN=Marcksl1 PE=1 SV=2                      | 1.153 | 1.379 | 1.266 | 1.620 | 1.940 | 2.062 |
| Granulins OS=Mus musculus GN=Grn PE=1 SV=2                                        | 1.006 | 1.030 | 1.018 | 0.554 | 0.479 | 0.558 |
| Stromelysin-1 OS=Mus musculus GN=Mmp3 PE=2 SV=2                                   | 1.049 | 1.216 | 1.132 | 0.557 | 0.473 | 0.622 |
| Connective tissue growth factor OS=Mus musculus GN=Ctgf PE=2 SV=3                 | 1.000 | 1.017 | 1.009 | 0.555 | 0.465 | 0.508 |
| Polyadenylate-binding protein 1 OS=Mus musculus GN=Pabpc1 PE=1 SV=2               | 0.961 | 0.952 | 0.956 | 1.180 | 1.228 | 1.144 |

|                                                                                                          |       |       |       |       |       |       |
|----------------------------------------------------------------------------------------------------------|-------|-------|-------|-------|-------|-------|
| Ferritin light chain 1 OS=Mus musculus GN=Ftl1 PE=1 SV=2                                                 | 0.975 | 0.884 | 0.930 | 0.803 | 0.891 | 0.674 |
| Beta-hexosaminidase subunit alpha OS=Mus musculus GN=Hexa PE=1 SV=2                                      | 1.037 | 1.089 | 1.063 | 1.046 | 1.101 | 0.928 |
| Vascular cell adhesion protein 1 OS=Mus musculus GN=Vcam1 PE=1 SV=1                                      | 1.038 | 1.042 | 1.040 | 0.242 | 0.191 | 0.245 |
| NEDD8 OS=Mus musculus GN=Nedd8 PE=1 SV=2                                                                 | 1.000 | 0.956 | 0.978 | 1.302 | 1.221 | 1.748 |
| Alpha-2-HS-glycoprotein OS=Mus musculus GN=Ahsg PE=1 SV=1                                                | 1.030 | 1.031 | 1.031 | 1.327 | 0.976 | 1.513 |
| Ornithine aminotransferase, mitochondrial OS=Mus musculus GN=Oat PE=1 SV=1                               | 1.000 | 1.010 | 1.005 | 0.577 | 0.962 | 0.623 |
| Cyclin-dependent kinase 4 OS=Mus musculus GN=Cdk4 PE=1 SV=1                                              | 1.000 | 1.017 | 1.009 | 0.799 | 0.798 | 0.913 |
| Peptidyl-prolyl cis-trans isomerase C OS=Mus musculus GN=Ppic PE=1 SV=1                                  | 0.975 | 0.993 | 0.984 | 1.054 | 0.983 | 1.101 |
| Peptidyl-prolyl cis-trans isomerase FKBP4 OS=Mus musculus GN=Fkbp4 PE=1 SV=5                             | 0.965 | 1.218 | 1.091 | 1.567 | 1.571 | 1.426 |
| High mobility group protein B2 OS=Mus musculus GN=Hmgb2 PE=1 SV=3                                        | 1.002 | 1.125 | 1.064 | 3.373 | 4.234 | 3.479 |
| C-C motif chemokine 5 OS=Mus musculus GN=Ccl5 PE=2 SV=2                                                  | 1.000 | 0.894 | 0.947 | 0.850 | 0.787 | 0.411 |
| Aminoacyl tRNA synthase complex-interacting multifunctional protein 1 OS=Mus musculus GN=Aimp1 PE=1 SV=2 | 1.000 | 0.966 | 0.983 | 1.229 | 1.018 | 1.188 |
| cAMP-dependent protein kinase type II-beta regulatory subunit OS=Mus musculus GN=Prkar2b PE=1 SV=3       | 0.922 | 0.912 | 0.917 | 1.267 | 1.058 | 1.248 |
| Acyl-CoA-binding protein OS=Mus musculus GN=Dbi PE=1 SV=2                                                | 0.946 | 0.985 | 0.965 | 1.078 | 1.292 | 0.991 |
| Lupus La protein homolog OS=Mus musculus GN=Ssb PE=1 SV=1                                                | 1.000 | 1.125 | 1.062 | 0.731 | 1.101 | 0.819 |
| Antithrombin-III OS=Mus musculus GN=Serpinc1 PE=1 SV=1                                                   | 0.984 | 0.939 | 0.962 | 0.930 | 0.833 | 0.877 |
| Nectin-2 OS=Mus musculus GN=Pvr12 PE=1 SV=2                                                              | 1.000 | 1.077 | 1.038 | 0.834 | 0.744 | 0.799 |
| Cytochrome P450 2F2 OS=Mus musculus GN=Cyp2f2 PE=1 SV=1                                                  | 1.000 | 0.942 | 0.971 | 0.966 | 0.581 | 0.972 |
| 72 kDa type IV collagenase OS=Mus musculus GN=Mmp2 PE=1 SV=1                                             | 0.940 | 0.914 | 0.927 | 0.320 | 0.222 | 0.297 |
| Ran-specific GTPase-activating protein OS=Mus musculus GN=Ranbp1 PE=1 SV=2                               | 0.963 | 0.918 | 0.941 | 1.491 | 1.773 | 1.347 |
| Focal adhesion kinase 1 OS=Mus musculus GN=Ptk2 PE=1 SV=3                                                | 1.000 | 1.515 | 1.257 | 1.648 | 1.528 | 1.698 |
| Macrophage migration inhibitory factor OS=Mus musculus GN=Mif PE=1 SV=2                                  | 0.976 | 1.011 | 0.994 | 2.518 | 2.393 | 1.630 |
| Tyrosine-protein phosphatase non-receptor type 11 OS=Mus musculus GN=Ptpn11 PE=1 SV=2                    | 1.000 | 1.166 | 1.083 | 3.171 | 2.540 | 2.442 |
| Ras-related protein Rab-5C OS=Mus musculus GN=Rab5c PE=1 SV=2                                            | 1.000 | 0.881 | 0.940 | 0.856 | 0.704 | 0.861 |
| Thrombospondin-1 OS=Mus musculus GN=Thbs1 PE=1 SV=1                                                      | 0.957 | 0.945 | 0.951 | 0.731 | 0.772 | 0.712 |
| rRNA 2'-O-methyltransferase fibrillarin OS=Mus musculus GN=Fbl PE=1 SV=2                                 | 1.000 | 1.036 | 1.018 | 0.812 | 0.838 | 1.511 |
| Calnexin OS=Mus musculus GN=Canx PE=1 SV=1                                                               | 1.055 | 1.086 | 1.071 | 0.559 | 0.643 | 0.644 |
| AP-1 complex subunit mu-1 OS=Mus musculus GN=Ap1m1 PE=1 SV=3                                             | 1.000 | 0.982 | 0.991 | 0.751 | 0.906 | 0.814 |
| Peroxiredoxin-1 OS=Mus musculus GN=Prdx1 PE=1 SV=1                                                       | 1.058 | 1.122 | 1.090 | 1.798 | 1.872 | 1.631 |
| 60S ribosomal protein L12 OS=Mus musculus GN=Rpl12 PE=1 SV=2                                             | 1.043 | 1.015 | 1.029 | 1.093 | 1.068 | 1.278 |
| Transgelin OS=Mus musculus GN=Tagln PE=1 SV=3                                                            | 0.995 | 1.118 | 1.056 | 0.680 | 0.825 | 0.667 |



|                                                                                                |       |       |       |       |       |       |
|------------------------------------------------------------------------------------------------|-------|-------|-------|-------|-------|-------|
| Fibulin-2 OS=Mus musculus GN=Fbln2 PE=1 SV=2                                                   | 0.990 | 1.031 | 1.011 | 0.669 | 0.739 | 0.726 |
| Stress-70 protein, mitochondrial OS=Mus musculus GN=Hspa9 PE=1 SV=3                            | 1.029 | 0.990 | 1.009 | 0.841 | 0.981 | 0.799 |
| Dynamin-2 OS=Mus musculus GN=Dnm2 PE=1 SV=2                                                    | 1.000 | 1.058 | 1.029 | 1.083 | 0.989 | 1.505 |
| Tight junction protein ZO-1 OS=Mus musculus GN=Tjp1 PE=1 SV=2                                  | 1.000 | 0.858 | 0.929 | 0.598 | 0.950 | 0.997 |
| Adenylyl cyclase-associated protein 1 OS=Mus musculus GN=Cap1 PE=1 SV=4                        | 0.944 | 0.911 | 0.927 | 0.917 | 0.989 | 1.043 |
| Transketolase OS=Mus musculus GN=Tkt PE=1 SV=1                                                 | 1.113 | 1.214 | 1.163 | 1.713 | 2.434 | 1.737 |
| Vacuolar protein sorting-associated protein 26A OS=Mus musculus GN=Vps26a PE=1 SV=1            | 1.000 | 1.035 | 1.018 | 1.309 | 1.048 | 1.061 |
| DNA-binding protein SMUBP-2 OS=Mus musculus GN=Ighmbp2 PE=1 SV=1                               | 1.000 | 0.872 | 0.936 | 1.195 | 1.016 | 2.075 |
| CD63 antigen OS=Mus musculus GN=Cd63 PE=1 SV=2                                                 | 1.000 | 0.967 | 0.984 | 0.636 | 0.736 | 0.710 |
| Enoyl-CoA delta isomerase 1, mitochondrial OS=Mus musculus GN=Eci1 PE=1 SV=2                   | 0.966 | 0.825 | 0.895 | 0.457 | 0.688 | 0.490 |
| Signal transducer and activator of transcription 3 OS=Mus musculus GN=Stat3 PE=1 SV=2          | 1.000 | 0.890 | 0.945 | 1.087 | 0.807 | 1.066 |
| Epidermal growth factor receptor substrate 15 OS=Mus musculus GN=Eps15 PE=1 SV=1               | 1.000 | 1.173 | 1.086 | 0.899 | 0.831 | 1.290 |
| Transcriptional activator protein Pur-alpha OS=Mus musculus GN=Pura PE=1 SV=1                  | 1.000 | 0.794 | 0.897 | 0.996 | 0.699 | 0.748 |
| T-complex protein 1 subunit theta OS=Mus musculus GN=Cct8 PE=1 SV=3                            | 1.044 | 1.046 | 1.045 | 1.289 | 1.315 | 1.384 |
| Growth/differentiation factor 6 OS=Mus musculus GN=Gdf6 PE=2 SV=2                              | 1.000 | 1.011 | 1.006 | 0.289 | 0.211 | 0.364 |
| Aldose reductase OS=Mus musculus GN=Akr1b1 PE=1 SV=3                                           | 0.910 | 0.927 | 0.919 | 2.234 | 2.847 | 2.271 |
| Aldose reductase-related protein 2 OS=Mus musculus GN=Akr1b8 PE=1 SV=2                         | 1.011 | 1.191 | 1.101 | 3.652 | 3.352 | 2.832 |
| Cofilin-2 OS=Mus musculus GN=Cfl2 PE=1 SV=1                                                    | 0.983 | 0.952 | 0.967 | 1.150 | 1.226 | 0.962 |
| Mannosyl-oligosaccharide 1,2-alpha-mannosidase IA OS=Mus musculus GN=Man1a1 PE=1 SV=1          | 1.118 | 0.931 | 1.024 | 0.442 | 0.416 | 0.509 |
| Peptidyl-prolyl cis-trans isomerase FKBP2 OS=Mus musculus GN=Fkbp2 PE=1 SV=1                   | 0.952 | 0.885 | 0.918 | 0.792 | 0.850 | 0.826 |
| Medium-chain specific acyl-CoA dehydrogenase, mitochondrial OS=Mus musculus GN=Acadm PE=1 SV=1 | 1.000 | 0.927 | 0.964 | 0.690 | 0.527 | 1.087 |
| Ran GTPase-activating protein 1 OS=Mus musculus GN=Rangap1 PE=1 SV=2                           | 0.997 | 1.060 | 1.029 | 1.516 | 1.351 | 1.370 |
| 26S protease regulatory subunit 7 OS=Mus musculus GN=Psmc2 PE=1 SV=5                           | 1.122 | 1.079 | 1.101 | 1.384 | 1.463 | 1.280 |
| Ras-related protein Rab-11B OS=Mus musculus GN=Rab11b PE=1 SV=3                                | 1.000 | 0.981 | 0.991 | 1.035 | 0.981 | 1.303 |
| Adenylosuccinate synthetase isozyme 2 OS=Mus musculus GN=Adss PE=1 SV=2                        | 0.849 | 0.896 | 0.872 | 1.013 | 0.991 | 1.095 |
| E3 ubiquitin-protein ligase NEDD4 OS=Mus musculus GN=Nedd4 PE=1 SV=3                           | 0.994 | 1.117 | 1.056 | 1.068 | 0.953 | 0.961 |
| Quinone oxidoreductase OS=Mus musculus GN=Cryz PE=1 SV=1                                       | 1.000 | 1.036 | 1.018 | 0.906 | 1.209 | 1.027 |
| Aldehyde dehydrogenase, mitochondrial OS=Mus musculus GN=Aldh2 PE=1 SV=1                       | 1.000 | 1.089 | 1.045 | 0.936 | 0.900 | 0.851 |
| Aldehyde dehydrogenase, dimeric NADP-preferring OS=Mus musculus GN=Aldh3a1 PE=1 SV=2           | 0.947 | 0.906 | 0.927 | 1.457 | 1.520 | 1.327 |
| F-actin-capping protein subunit alpha-1 OS=Mus musculus GN=Capza1 PE=1 SV=4                    | 1.016 | 1.041 | 1.029 | 1.592 | 1.448 | 1.753 |
| F-actin-capping protein subunit alpha-2 OS=Mus                                                 | 0.938 | 0.902 | 0.920 | 0.991 | 0.942 | 0.892 |

|                                                                                  |       |       |       |       |       |       |
|----------------------------------------------------------------------------------|-------|-------|-------|-------|-------|-------|
| musculus GN=Capza2 PE=1 SV=3                                                     |       |       |       |       |       |       |
| F-actin-capping protein subunit beta OS=Mus musculus GN=Capzb PE=1 SV=3          | 1.038 | 1.101 | 1.069 | 1.187 | 1.625 | 1.207 |
| Glutathione reductase, mitochondrial OS=Mus musculus GN=Gsr PE=1 SV=3            | 0.954 | 1.398 | 1.176 | 1.870 | 1.717 | 1.781 |
| Insulin-like growth factor-binding protein 2 OS=Mus musculus GN=Igfbp2 PE=2 SV=2 | 0.969 | 0.920 | 0.945 | 0.228 | 0.247 | 0.338 |
| Insulin-like growth factor-binding protein 3 OS=Mus musculus GN=Igfbp3 PE=2 SV=2 | 0.981 | 1.014 | 0.998 | 0.632 | 0.511 | 0.659 |
| Insulin-like growth factor-binding protein 4 OS=Mus musculus GN=Igfbp4 PE=1 SV=2 | 0.971 | 1.066 | 1.018 | 1.866 | 1.468 | 1.574 |
| Insulin-like growth factor-binding protein 6 OS=Mus musculus GN=Igfbp6 PE=2 SV=2 | 0.926 | 0.934 | 0.930 | 2.379 | 2.703 | 1.598 |
| Crk-like protein OS=Mus musculus GN=Crkl PE=1 SV=2                               | 1.000 | 0.956 | 0.978 | 1.246 | 1.269 | 1.008 |
| 60S acidic ribosomal protein P1 OS=Mus musculus GN=Rplp1 PE=1 SV=1               | 0.992 | 1.058 | 1.025 | 1.666 | 1.769 | 1.709 |
| 60S ribosomal protein L5 OS=Mus musculus GN=Rpl5 PE=1 SV=3                       | 1.000 | 1.021 | 1.011 | 0.762 | 0.810 | 0.735 |
| Eukaryotic translation initiation factor 1 OS=Mus musculus GN=Eif1 PE=1 SV=2     | 1.000 | 0.835 | 0.918 | 0.727 | 0.914 | 0.680 |
| Annexin A5 OS=Mus musculus GN=Anxa5 PE=1 SV=1                                    | 1.120 | 1.312 | 1.216 | 1.251 | 1.655 | 1.098 |
| Protein 4.1 OS=Mus musculus GN=Epb41 PE=1 SV=2                                   | 1.000 | 0.692 | 0.846 | 1.278 | 0.404 | 0.605 |
| Tubulin-specific chaperone A OS=Mus musculus GN=Tbca PE=1 SV=3                   | 1.000 | 1.309 | 1.154 | 1.941 | 1.727 | 1.764 |
| Prelamin-A/C OS=Mus musculus GN=Lmna PE=1 SV=2                                   | 1.018 | 1.011 | 1.014 | 1.311 | 1.431 | 1.292 |
| Heat shock 70 kDa protein 4L OS=Mus musculus GN=Hspa4l PE=1 SV=2                 | 1.000 | 0.976 | 0.988 | 0.568 | 0.559 | 0.920 |
| Carbonyl reductase [NADPH] 1 OS=Mus musculus GN=Cbr1 PE=1 SV=3                   | 1.000 | 0.903 | 0.951 | 0.929 | 0.730 | 0.672 |
| Pentraxin-related protein PTX3 OS=Mus musculus GN=Ptx3 PE=1 SV=2                 | 1.035 | 1.045 | 1.040 | 0.342 | 0.266 | 0.302 |
| Glutathione S-transferase Mu 5 OS=Mus musculus GN=Gstm5 PE=1 SV=1                | 1.000 | 0.959 | 0.980 | 1.342 | 1.023 | 1.705 |
| Heterogeneous nuclear ribonucleoprotein A1 OS=Mus musculus GN=Hnrnpa1 PE=1 SV=2  | 1.203 | 1.187 | 1.195 | 1.863 | 1.986 | 1.714 |
| Protein phosphatase 1A OS=Mus musculus GN=Ppm1a PE=1 SV=1                        | 0.936 | 0.845 | 0.891 | 0.857 | 0.840 | 1.109 |
| DNA replication licensing factor MCM4 OS=Mus musculus GN=Mcm4 PE=1 SV=1          | 1.000 | 0.884 | 0.942 | 0.851 | 0.874 | 0.812 |
| DNA replication licensing factor MCM5 OS=Mus musculus GN=Mcm5 PE=1 SV=1          | 1.000 | 1.010 | 1.005 | 0.719 | 0.685 | 0.817 |
| Proteasome subunit alpha type-2 OS=Mus musculus GN=Psma2 PE=1 SV=3               | 0.928 | 0.905 | 0.916 | 1.145 | 1.370 | 1.367 |
| C-X-C motif chemokine 5 OS=Mus musculus GN=Cxcl5 PE=1 SV=2                       | 1.029 | 1.094 | 1.061 | 2.457 | 2.365 | 1.926 |
| Adenosylhomocysteinase OS=Mus musculus GN=Ahcy PE=1 SV=3                         | 1.124 | 1.160 | 1.142 | 1.539 | 2.048 | 1.748 |
| Rab GDP dissociation inhibitor alpha OS=Mus musculus GN=Gdi1 PE=1 SV=3           | 1.000 | 0.946 | 0.973 | 1.204 | 1.403 | 1.109 |
| Arylsulfatase A OS=Mus musculus GN=Arsa PE=1 SV=2                                | 1.000 | 0.971 | 0.985 | 0.890 | 0.858 | 0.873 |
| Keratin, type II cytoskeletal 6A OS=Mus musculus GN=Krt6a PE=1 SV=3              | 1.030 | 0.873 | 0.952 | 0.531 | 0.644 | 0.625 |
| V-type proton ATPase catalytic subunit A OS=Mus musculus GN=Atp6v1a PE=1 SV=2    | 0.906 | 1.014 | 0.960 | 0.871 | 1.109 | 0.944 |
| Protein S100-A11 OS=Mus musculus GN=S100a11 PE=1 SV=1                            | 1.294 | 1.656 | 1.475 | 1.948 | 2.012 | 1.658 |

|                                                                                         |       |       |       |       |       |       |
|-----------------------------------------------------------------------------------------|-------|-------|-------|-------|-------|-------|
| Proliferation-associated protein 2G4 OS=Mus musculus GN=Pa2g4 PE=1 SV=3                 | 0.871 | 0.845 | 0.858 | 1.286 | 1.666 | 1.326 |
| Fibromodulin OS=Mus musculus GN=Fmod PE=2 SV=1                                          | 1.000 | 0.948 | 0.974 | 0.526 | 0.590 | 1.140 |
| Calpastatin OS=Mus musculus GN=Cast PE=1 SV=2                                           | 1.073 | 1.026 | 1.049 | 1.345 | 1.193 | 1.042 |
| Ras-related protein Rab-7a OS=Mus musculus GN=Rab7a PE=1 SV=2                           | 0.991 | 1.058 | 1.024 | 1.079 | 1.070 | 1.156 |
| Alpha-galactosidase A OS=Mus musculus GN=Gla PE=1 SV=1                                  | 1.000 | 1.055 | 1.027 | 1.252 | 1.121 | 1.413 |
| Glypican-4 OS=Mus musculus GN=Gpc4 PE=1 SV=2                                            | 1.000 | 0.996 | 0.998 | 0.550 | 0.373 | 0.614 |
| Glutathione synthetase OS=Mus musculus GN=Gss PE=1 SV=1                                 | 1.000 | 1.010 | 1.005 | 1.374 | 1.061 | 1.567 |
| Hepatoma-derived growth factor OS=Mus musculus GN=Hdgf PE=1 SV=2                        | 1.034 | 0.968 | 1.001 | 1.976 | 2.249 | 1.793 |
| Lumican OS=Mus musculus GN=Lum PE=1 SV=2                                                | 0.955 | 0.929 | 0.942 | 0.903 | 0.698 | 1.023 |
| Importin subunit alpha-1 OS=Mus musculus GN=Kpna2 PE=1 SV=2                             | 0.992 | 1.000 | 0.996 | 1.250 | 1.357 | 1.498 |
| Pyruvate kinase PKM OS=Mus musculus GN=Pkm PE=1 SV=4                                    | 1.145 | 1.122 | 1.133 | 2.471 | 2.610 | 2.304 |
| Ribonuclease UK114 OS=Mus musculus GN=Hrsp12 PE=1 SV=3                                  | 1.000 | 0.807 | 0.904 | 0.966 | 0.786 | 1.079 |
| Nucleolysin TIA-1 OS=Mus musculus GN=Tia1 PE=1 SV=1                                     | 1.000 | 0.828 | 0.914 | 0.558 | 0.451 | 0.498 |
| High mobility group protein HMGI-C OS=Mus musculus GN=Hmga2 PE=1 SV=1                   | 0.700 | 0.623 | 0.662 | 5.286 | 6.072 | 3.564 |
| 60S ribosomal protein L10a OS=Mus musculus GN=Rpl10a PE=1 SV=3                          | 1.070 | 1.140 | 1.105 | 1.033 | 1.363 | 1.224 |
| Matrix metalloproteinase-14 OS=Mus musculus GN=Mmp14 PE=2 SV=3                          | 1.000 | 1.066 | 1.033 | 0.930 | 0.520 | 1.098 |
| Phosphatidylinositol transfer protein alpha isoform OS=Mus musculus GN=Pltpna PE=1 SV=2 | 0.906 | 0.913 | 0.910 | 1.471 | 1.642 | 1.355 |
| Phosphatidylinositol transfer protein beta isoform OS=Mus musculus GN=Pltpnb PE=1 SV=2  | 1.000 | 0.936 | 0.968 | 0.798 | 1.002 | 0.855 |
| Ras-related protein Rab-2A OS=Mus musculus GN=Rab2a PE=1 SV=1                           | 1.000 | 0.860 | 0.930 | 0.414 | 0.468 | 0.583 |
| Cellular nucleic acid-binding protein OS=Mus musculus GN=Cnbp PE=1 SV=2                 | 1.000 | 0.930 | 0.965 | 1.662 | 1.946 | 1.414 |
| Stathmin OS=Mus musculus GN=Stmn1 PE=1 SV=2                                             | 1.000 | 0.835 | 0.917 | 2.007 | 2.341 | 2.035 |
| Elastin OS=Mus musculus GN=Eln PE=1 SV=2                                                | 0.942 | 1.083 | 1.012 | 0.360 | 0.299 | 0.417 |
| UV excision repair protein RAD23 homolog A OS=Mus musculus GN=Rad23a PE=1 SV=2          | 0.951 | 2.176 | 1.563 | 4.032 | 3.879 | 3.498 |
| UV excision repair protein RAD23 homolog B OS=Mus musculus GN=Rad23b PE=1 SV=2          | 1.058 | 1.061 | 1.059 | 1.514 | 1.687 | 1.470 |
| 26S protease regulatory subunit 6B OS=Mus musculus GN=Psmc4 PE=1 SV=2                   | 1.000 | 0.805 | 0.903 | 0.602 | 1.103 | 0.808 |
| Adenylosuccinate lyase OS=Mus musculus GN=Adsl PE=1 SV=2                                | 1.000 | 0.900 | 0.950 | 1.094 | 1.032 | 1.014 |
| Probable ATP-dependent RNA helicase DDX6 OS=Mus musculus GN=Ddx6 PE=1 SV=1              | 1.000 | 0.994 | 0.997 | 1.649 | 1.450 | 1.568 |
| [Protein ADP-ribosylarginine] hydrolase OS=Mus musculus GN=Adprh PE=1 SV=1              | 1.000 | 0.970 | 0.985 | 0.917 | 0.759 | 1.063 |
| Microfibrillar-associated protein 2 OS=Mus musculus GN=Mfap2 PE=2 SV=1                  | 1.000 | 0.746 | 0.873 | 1.207 | 0.585 | 0.719 |
| Phospholipid transfer protein OS=Mus musculus GN=Pltp PE=1 SV=1                         | 1.000 | 1.158 | 1.079 | 1.049 | 0.745 | 0.883 |
| Adenosine kinase OS=Mus musculus GN=Adk PE=1 SV=2                                       | 1.000 | 1.164 | 1.082 | 1.467 | 1.426 | 1.620 |
| Cadherin-11 OS=Mus musculus GN=Cdh11 PE=1 SV=1                                          | 1.000 | 0.896 | 0.948 | 1.125 | 0.960 | 0.953 |
| Acylphosphatase-2 OS=Mus musculus GN=Acyp2 PE=1 SV=2                                    | 1.059 | 1.178 | 1.119 | 1.149 | 1.443 | 1.258 |

|                                                                                                   |       |        |       |        |        |        |
|---------------------------------------------------------------------------------------------------|-------|--------|-------|--------|--------|--------|
| Acylphosphatase-1 OS=Mus musculus GN=Acyp1 PE=1 SV=2                                              | 1.000 | 1.146  | 1.073 | 1.399  | 1.788  | 1.528  |
| Cytochrome c oxidase subunit 6B1 OS=Mus musculus GN=Cox6b1 PE=1 SV=2                              | 1.000 | 0.900  | 0.950 | 1.155  | 0.833  | 0.939  |
| Cytochrome b5 OS=Mus musculus GN=Cyb5a PE=1 SV=2                                                  | 1.000 | 1.143  | 1.072 | 1.254  | 1.440  | 0.767  |
| Ubiquitin carboxyl-terminal hydrolase 5 OS=Mus musculus GN=Usp5 PE=1 SV=1                         | 1.060 | 0.962  | 1.011 | 1.328  | 1.330  | 1.216  |
| ATP synthase subunit beta, mitochondrial OS=Mus musculus GN=Atp5b PE=1 SV=2                       | 0.954 | 0.993  | 0.974 | 0.632  | 0.722  | 0.677  |
| Protein S100-A1 OS=Mus musculus GN=S100a1 PE=1 SV=2                                               | 0.035 | 15.223 | 7.629 | 16.190 | 14.642 | 15.007 |
| Programmed cell death protein 5 OS=Mus musculus GN=Pdcd5 PE=1 SV=3                                | 0.984 | 0.988  | 0.986 | 1.682  | 1.689  | 1.372  |
| Sjogren syndrome/scleroderma autoantigen 1 homolog OS=Mus musculus GN=Sssca1 PE=1 SV=1            | 1.000 | 1.029  | 1.015 | 1.502  | 2.811  | 2.157  |
| RNA-binding protein FUS OS=Mus musculus GN=Fus PE=1 SV=1                                          | 1.000 | 1.025  | 1.013 | 1.069  | 1.450  | 0.975  |
| Endoplasmic reticulum resident protein 29 OS=Mus musculus GN=Erp29 PE=1 SV=2                      | 1.000 | 0.911  | 0.956 | 0.628  | 0.827  | 0.852  |
| Elongation factor 1-delta OS=Mus musculus GN=Eef1d PE=1 SV=3                                      | 1.032 | 0.987  | 1.010 | 1.363  | 1.550  | 1.344  |
| Alpha-actinin-4 OS=Mus musculus GN=Actn4 PE=1 SV=1                                                | 1.016 | 1.047  | 1.031 | 1.402  | 1.429  | 1.193  |
| Lysyl oxidase homolog 2 OS=Mus musculus GN=Loxl2 PE=1 SV=2                                        | 0.967 | 0.886  | 0.926 | 0.515  | 0.383  | 0.490  |
| Elongation factor 2 OS=Mus musculus GN=Eef2 PE=1 SV=2                                             | 1.042 | 1.114  | 1.078 | 1.891  | 1.787  | 1.738  |
| Serine/threonine-protein phosphatase 2A activator OS=Mus musculus GN=Ppp2r4 PE=1 SV=1             | 0.996 | 0.939  | 0.968 | 0.946  | 0.864  | 0.907  |
| Tropomyosin alpha-1 chain OS=Mus musculus GN=Tpm1 PE=1 SV=1                                       | 0.869 | 0.922  | 0.895 | 1.185  | 1.196  | 1.103  |
| Tropomyosin beta chain OS=Mus musculus GN=Tpm2 PE=1 SV=1                                          | 0.943 | 1.049  | 0.996 | 1.376  | 1.452  | 1.327  |
| 182 kDa tankyrase-1-binding protein OS=Mus musculus GN=Tnks1bp1 PE=1 SV=2                         | 1.016 | 1.027  | 1.022 | 0.924  | 1.130  | 1.021  |
| Eukaryotic translation initiation factor 5 OS=Mus musculus GN=Eif5 PE=1 SV=1                      | 1.028 | 0.919  | 0.974 | 0.829  | 0.950  | 0.949  |
| Actin-related protein 2/3 complex subunit 4 OS=Mus musculus GN=Arpc4 PE=1 SV=3                    | 1.000 | 1.165  | 1.082 | 1.253  | 1.015  | 1.249  |
| RuvB-like 1 OS=Mus musculus GN=Ruvbl1 PE=1 SV=1                                                   | 1.037 | 0.913  | 0.975 | 0.992  | 1.116  | 1.001  |
| Eukaryotic translation initiation factor 3 subunit E OS=Mus musculus GN=Eif3e PE=1 SV=1           | 1.000 | 1.036  | 1.018 | 0.803  | 0.829  | 1.060  |
| Poly(rC)-binding protein 1 OS=Mus musculus GN=Pcbp1 PE=1 SV=1                                     | 0.963 | 1.157  | 1.060 | 2.250  | 2.236  | 2.093  |
| Gamma-aminobutyric acid receptor-associated protein-like 2 OS=Mus musculus GN=Gabarapl2 PE=1 SV=1 | 1.000 | 0.993  | 0.996 | 0.621  | 0.731  | 0.669  |
| Nuclear protein localization protein 4 homolog OS=Mus musculus GN=Nploc4 PE=1 SV=3                | 1.000 | 0.926  | 0.963 | 0.901  | 0.802  | 1.173  |
| Actin, cytoplasmic 1 OS=Mus musculus GN=Actb PE=1 SV=1                                            | 1.027 | 1.008  | 1.018 | 1.223  | 1.019  | 1.174  |
| Cell division control protein 42 homolog OS=Mus musculus GN=Cdc42 PE=1 SV=2                       | 0.962 | 0.935  | 0.949 | 0.810  | 0.902  | 1.088  |
| Cold-inducible RNA-binding protein OS=Mus musculus GN=Cirbp PE=1 SV=1                             | 1.000 | 1.164  | 1.082 | 1.909  | 1.781  | 1.417  |
| Eukaryotic initiation factor 4A-I OS=Mus musculus GN=Eif4a1 PE=1 SV=1                             | 1.059 | 1.111  | 1.085 | 1.324  | 1.434  | 1.372  |
| 40S ribosomal protein S20 OS=Mus musculus                                                         | 1.000 | 1.076  | 1.038 | 2.349  | 1.978  | 2.453  |

|                                                                                                      |       |       |       |       |       |       |
|------------------------------------------------------------------------------------------------------|-------|-------|-------|-------|-------|-------|
| GN=Rps20 PE=1 SV=1                                                                                   |       |       |       |       |       |       |
| Ubiquitin-conjugating enzyme E2 D3 OS=Mus musculus GN=Ube2d3 PE=1 SV=1                               | 1.000 | 0.971 | 0.985 | 2.801 | 2.468 | 2.508 |
| Ubiquitin-conjugating enzyme E2 K OS=Mus musculus GN=Ube2k PE=1 SV=3                                 | 1.213 | 1.036 | 1.125 | 1.276 | 1.162 | 1.600 |
| Ubiquitin-conjugating enzyme E2 N OS=Mus musculus GN=Ube2n PE=1 SV=1                                 | 1.007 | 1.013 | 1.010 | 1.302 | 1.463 | 1.415 |
| Actin-related protein 2 OS=Mus musculus GN=Actr2 PE=1 SV=1                                           | 1.000 | 0.959 | 0.979 | 1.048 | 1.166 | 1.070 |
| Alpha-centractin OS=Mus musculus GN=Actr1a PE=1 SV=1                                                 | 1.015 | 1.385 | 1.200 | 1.513 | 1.246 | 1.221 |
| COP9 signalosome complex subunit 2 OS=Mus musculus GN=Cops2 PE=1 SV=1                                | 1.000 | 0.897 | 0.949 | 1.696 | 0.700 | 0.768 |
| ADP-ribosylation factor 3 OS=Mus musculus GN=Arf3 PE=2 SV=2                                          | 0.961 | 1.035 | 0.998 | 1.102 | 1.163 | 1.256 |
| ATP-binding cassette sub-family E member 1 OS=Mus musculus GN=Abce1 PE=1 SV=1                        | 1.000 | 0.884 | 0.942 | 0.355 | 0.575 | 0.378 |
| Ras-related protein Rap-2b OS=Mus musculus GN=Rap2b PE=1 SV=1                                        | 1.000 | 0.998 | 0.999 | 1.109 | 0.797 | 1.158 |
| Proteasome activator complex subunit 3 OS=Mus musculus GN=Psme3 PE=1 SV=1                            | 0.922 | 0.990 | 0.956 | 1.113 | 1.027 | 1.045 |
| N-alpha-acetyltransferase 20 OS=Mus musculus GN=Naa20 PE=1 SV=1                                      | 1.000 | 0.909 | 0.954 | 0.858 | 0.586 | 1.080 |
| Prefoldin subunit 3 OS=Mus musculus GN=Vbp1 PE=1 SV=2                                                | 1.008 | 0.914 | 0.961 | 1.157 | 1.299 | 1.121 |
| Coatomer subunit zeta-1 OS=Mus musculus GN=Copz1 PE=1 SV=1                                           | 1.000 | 1.011 | 1.006 | 0.973 | 1.074 | 1.408 |
| Small ubiquitin-related modifier 2 OS=Mus musculus GN=Sumo2 PE=1 SV=1                                | 1.000 | 0.894 | 0.947 | 1.454 | 1.689 | 1.619 |
| Ubiquitin-fold modifier 1 OS=Mus musculus GN=Ufm1 PE=1 SV=1                                          | 1.000 | 1.088 | 1.044 | 1.136 | 1.260 | 1.197 |
| Nuclear transport factor 2 OS=Mus musculus GN=Nutf2 PE=1 SV=1                                        | 1.111 | 1.172 | 1.142 | 1.462 | 1.782 | 1.333 |
| Heterogeneous nuclear ribonucleoprotein K OS=Mus musculus GN=Hnrnpk PE=1 SV=1                        | 1.147 | 1.159 | 1.153 | 1.702 | 1.730 | 1.400 |
| 14-3-3 protein gamma OS=Mus musculus GN=Ywhag PE=1 SV=2                                              | 0.991 | 1.016 | 1.003 | 1.084 | 1.125 | 1.101 |
| Mitochondrial import inner membrane translocase subunit Tim13 OS=Mus musculus GN=Timm13 PE=1 SV=1    | 1.036 | 0.992 | 1.014 | 1.275 | 1.176 | 1.298 |
| 40S ribosomal protein S7 OS=Mus musculus GN=Rps7 PE=2 SV=1                                           | 2.699 | 2.910 | 2.804 | 2.029 | 2.809 | 2.686 |
| Serine/threonine-protein phosphatase PP1-alpha catalytic subunit OS=Mus musculus GN=Ppp1ca PE=1 SV=1 | 1.012 | 1.096 | 1.054 | 1.598 | 1.864 | 1.582 |
| 26S protease regulatory subunit 4 OS=Mus musculus GN=Psmc1 PE=1 SV=1                                 | 0.947 | 0.982 | 0.964 | 1.195 | 1.231 | 1.232 |
| 26S protease regulatory subunit 8 OS=Mus musculus GN=Psmc5 PE=1 SV=1                                 | 1.000 | 0.923 | 0.961 | 0.742 | 0.938 | 0.823 |
| Calmodulin OS=Mus musculus GN=Calm1 PE=1 SV=2                                                        | 0.913 | 0.940 | 0.927 | 1.265 | 1.541 | 1.151 |
| 40S ribosomal protein S8 OS=Mus musculus GN=Rps8 PE=1 SV=2                                           | 1.000 | 0.809 | 0.905 | 0.444 | 1.179 | 0.568 |
| Ubiquitin-conjugating enzyme E2 H OS=Mus musculus GN=Ube2h PE=1 SV=1                                 | 1.000 | 0.912 | 0.956 | 0.878 | 1.173 | 1.443 |
| 14-3-3 protein epsilon OS=Mus musculus GN=Ywhae PE=1 SV=1                                            | 1.046 | 1.086 | 1.066 | 1.153 | 1.174 | 1.113 |
| 40S ribosomal protein S14 OS=Mus musculus GN=Rps14 PE=1 SV=3                                         | 1.003 | 0.924 | 0.964 | 0.781 | 0.747 | 0.655 |
| Small nuclear ribonucleoprotein E OS=Mus musculus GN=Snrpe PE=1 SV=1                                 | 0.998 | 0.830 | 0.914 | 0.617 | 0.729 | 0.847 |

|                                                                                                    |       |       |       |       |       |       |
|----------------------------------------------------------------------------------------------------|-------|-------|-------|-------|-------|-------|
| Small nuclear ribonucleoprotein F OS=Mus musculus GN=Snrpf PE=1 SV=1                               | 1.000 | 0.839 | 0.920 | 0.909 | 0.815 | 0.705 |
| Small nuclear ribonucleoprotein G OS=Mus musculus GN=Snrpg PE=1 SV=1                               | 1.000 | 0.717 | 0.859 | 0.459 | 0.548 | 0.782 |
| U6 snRNA-associated Sm-like protein LSm3 OS=Mus musculus GN=Lsm3 PE=1 SV=2                         | 1.000 | 0.861 | 0.930 | 1.026 | 1.077 | 0.953 |
| Small nuclear ribonucleoprotein Sm D1 OS=Mus musculus GN=Snrpd1 PE=1 SV=1                          | 1.000 | 1.036 | 1.018 | 1.508 | 1.096 | 1.250 |
| Small nuclear ribonucleoprotein Sm D2 OS=Mus musculus GN=Snrpd2 PE=1 SV=1                          | 1.009 | 0.970 | 0.989 | 0.740 | 0.743 | 0.775 |
| Small nuclear ribonucleoprotein Sm D3 OS=Mus musculus GN=Snrpd3 PE=1 SV=1                          | 1.000 | 0.979 | 0.989 | 1.058 | 1.041 | 0.872 |
| 26S protease regulatory subunit 10B OS=Mus musculus GN=Psmc6 PE=1 SV=1                             | 0.942 | 0.811 | 0.877 | 0.837 | 0.788 | 0.837 |
| TSC22 domain family protein 1 OS=Mus musculus GN=Tsc22d1 PE=1 SV=2                                 | 1.000 | 1.394 | 1.197 | 1.392 | 1.150 | 1.523 |
| Dynein light chain roadblock-type 1 OS=Mus musculus GN=Dynlrb1 PE=1 SV=3                           | 0.953 | 0.981 | 0.967 | 0.972 | 0.955 | 0.964 |
| 40S ribosomal protein S4, X isoform OS=Mus musculus GN=Rps4x PE=1 SV=2                             | 1.000 | 0.992 | 0.996 | 0.465 | 0.979 | 0.960 |
| AP-2 complex subunit sigma OS=Mus musculus GN=Ap2s1 PE=1 SV=1                                      | 1.000 | 1.112 | 1.056 | 1.427 | 1.354 | 1.337 |
| 60S ribosomal protein L23a OS=Mus musculus GN=Rpl23a PE=1 SV=1                                     | 1.000 | 0.952 | 0.976 | 1.093 | 2.344 | 1.459 |
| 40S ribosomal protein S6 OS=Mus musculus GN=Rps6 PE=1 SV=1                                         | 1.000 | 0.868 | 0.934 | 0.556 | 1.017 | 1.030 |
| Myotrophin OS=Mus musculus GN=Mtpn PE=1 SV=2                                                       | 1.000 | 0.941 | 0.971 | 1.980 | 2.335 | 1.676 |
| Histone H4 OS=Mus musculus GN=Hist1h4a PE=1 SV=2                                                   | 1.000 | 0.906 | 0.953 | 0.490 | 0.824 | 0.611 |
| V-type proton ATPase subunit B, brain isoform OS=Mus musculus GN=Atp6v1b2 PE=1 SV=1                | 1.011 | 0.939 | 0.975 | 0.679 | 0.849 | 0.810 |
| Ras-related protein Rab-1A OS=Mus musculus GN=Rab1A PE=1 SV=3                                      | 1.000 | 0.879 | 0.939 | 0.993 | 1.198 | 0.983 |
| GTP-binding nuclear protein Ran OS=Mus musculus GN=Ran PE=1 SV=3                                   | 0.918 | 0.882 | 0.900 | 1.330 | 1.563 | 1.333 |
| 60S ribosomal protein L23 OS=Mus musculus GN=Rpl23 PE=1 SV=1                                       | 1.000 | 0.762 | 0.881 | 0.759 | 0.743 | 0.921 |
| 40S ribosomal protein S24 OS=Mus musculus GN=Rps24 PE=1 SV=1                                       | 1.000 | 0.761 | 0.881 | 0.409 | 0.418 | 0.359 |
| 40S ribosomal protein S28 OS=Mus musculus GN=Rps28 PE=1 SV=1                                       | 1.004 | 0.945 | 0.974 | 1.479 | 1.770 | 1.338 |
| Transcription elongation factor B polypeptide 2 OS=Mus musculus GN=Tceb2 PE=1 SV=1                 | 0.961 | 1.019 | 0.990 | 1.918 | 2.930 | 2.701 |
| Guanine nucleotide-binding protein G(I)/G(S)/G(T) subunit beta-2 OS=Mus musculus GN=Gnb2 PE=1 SV=3 | 1.636 | 1.739 | 1.687 | 2.077 | 2.179 | 1.763 |
| Cytochrome c, somatic OS=Mus musculus GN=Cycc PE=1 SV=2                                            | 1.120 | 1.084 | 1.102 | 1.670 | 2.063 | 1.633 |
| 60S ribosomal protein L31 OS=Mus musculus GN=Rpl31 PE=1 SV=1                                       | 1.000 | 1.001 | 1.001 | 0.862 | 1.051 | 0.756 |
| 40S ribosomal protein S3 OS=Mus musculus GN=Rps3 PE=1 SV=1                                         | 0.991 | 1.065 | 1.028 | 1.124 | 1.095 | 1.274 |
| Nuclease-sensitive element-binding protein 1 OS=Mus musculus GN=Ybx1 PE=1 SV=3                     | 0.992 | 0.948 | 0.970 | 0.796 | 1.004 | 0.842 |
| Profilin-1 OS=Mus musculus GN=Pfn1 PE=1 SV=2                                                       | 1.016 | 1.033 | 1.024 | 1.233 | 1.165 | 1.110 |
| Ubiquitin-60S ribosomal protein L40 OS=Mus musculus GN=Uba52 PE=1 SV=2                             | 1.092 | 1.119 | 1.105 | 1.424 | 1.848 | 1.274 |
| Platelet-activating factor acetylhydrolase IB subunit alpha OS=Mus musculus GN=Pafah1b1 PE=1 SV=2  | 1.032 | 1.158 | 1.095 | 1.248 | 1.559 | 1.196 |

|                                                                                                             |       |       |       |       |       |       |
|-------------------------------------------------------------------------------------------------------------|-------|-------|-------|-------|-------|-------|
| Heat shock cognate 71 kDa protein OS=Mus musculus GN=Hspa8 PE=1 SV=1                                        | 1.026 | 1.046 | 1.036 | 1.623 | 1.786 | 1.529 |
| Translationally-controlled tumor protein OS=Mus musculus GN=Tpt1 PE=1 SV=1                                  | 0.897 | 0.862 | 0.880 | 1.856 | 2.120 | 1.665 |
| DnaJ homolog subfamily A member 1 OS=Mus musculus GN=Dnaja1 PE=1 SV=1                                       | 0.954 | 1.021 | 0.988 | 0.776 | 0.821 | 0.984 |
| 60 kDa heat shock protein, mitochondrial OS=Mus musculus GN=Hspd1 PE=1 SV=1                                 | 1.165 | 1.143 | 1.154 | 0.873 | 1.308 | 0.834 |
| Eukaryotic translation initiation factor 4E OS=Mus musculus GN=Eif4e PE=1 SV=1                              | 1.056 | 1.018 | 1.037 | 1.546 | 1.791 | 1.734 |
| 14-3-3 protein zeta/delta OS=Mus musculus GN=Ywhaz PE=1 SV=1                                                | 0.993 | 1.045 | 1.019 | 1.544 | 1.565 | 1.415 |
| High mobility group protein B1 OS=Mus musculus GN=Hmgb1 PE=1 SV=2                                           | 0.909 | 0.877 | 0.893 | 2.586 | 3.213 | 2.427 |
| Dynein light chain 1, cytoplasmic OS=Mus musculus GN=Dynll1 PE=1 SV=1                                       | 1.000 | 0.997 | 0.999 | 1.392 | 1.346 | 1.080 |
| Eukaryotic translation initiation factor 5A-1 OS=Mus musculus GN=Eif5a PE=1 SV=2                            | 1.044 | 1.018 | 1.031 | 1.822 | 1.872 | 1.534 |
| 40S ribosomal protein S17 OS=Mus musculus GN=Rps17 PE=1 SV=2                                                | 1.029 | 0.962 | 0.995 | 0.790 | 1.383 | 0.633 |
| SUMO-conjugating enzyme UBC9 OS=Mus musculus GN=Ube2i PE=1 SV=1                                             | 0.990 | 1.000 | 0.995 | 1.562 | 1.806 | 1.678 |
| 40S ribosomal protein S12 OS=Mus musculus GN=Rps12 PE=1 SV=2                                                | 0.913 | 0.943 | 0.928 | 1.873 | 1.963 | 1.720 |
| 40S ribosomal protein S10 OS=Mus musculus GN=Rps10 PE=1 SV=1                                                | 0.969 | 0.881 | 0.925 | 0.829 | 1.137 | 0.727 |
| Serine/threonine-protein phosphatase 2B catalytic subunit alpha isoform OS=Mus musculus GN=Ppp3ca PE=1 SV=1 | 1.000 | 0.921 | 0.960 | 0.855 | 0.877 | 1.448 |
| Serine/threonine-protein phosphatase 2A catalytic subunit alpha isoform OS=Mus musculus GN=Ppp2ca PE=1 SV=1 | 1.049 | 0.949 | 0.999 | 0.944 | 0.895 | 0.938 |
| 60S ribosomal protein L22 OS=Mus musculus GN=Rpl22 PE=1 SV=2                                                | 0.969 | 1.019 | 0.994 | 1.136 | 1.229 | 1.265 |
| Actin, alpha cardiac muscle 1 OS=Mus musculus GN=Actc1 PE=1 SV=1                                            | 0.902 | 0.995 | 0.948 | 1.148 | 1.130 | 1.104 |
| Ubiquitin-conjugating enzyme E2 L3 OS=Mus musculus GN=Ube2l3 PE=1 SV=1                                      | 1.065 | 1.068 | 1.066 | 1.414 | 1.776 | 1.568 |
| Guanine nucleotide-binding protein subunit beta-2-like 1 OS=Mus musculus GN=Gnb2l1 PE=1 SV=3                | 1.143 | 1.098 | 1.121 | 1.127 | 1.381 | 1.206 |
| 14-3-3 protein theta OS=Mus musculus GN=Ywhaq PE=1 SV=1                                                     | 1.041 | 0.976 | 1.009 | 1.475 | 1.547 | 1.361 |
| Tubulin alpha-4A chain OS=Mus musculus GN=Tuba4a PE=1 SV=1                                                  | 1.000 | 1.005 | 1.003 | 5.666 | 2.975 | 4.718 |
| Tubulin beta-4B chain OS=Mus musculus GN=Tubb4b PE=1 SV=1                                                   | 0.967 | 0.993 | 0.980 | 1.194 | 1.170 | 1.173 |
| 14-3-3 protein eta OS=Mus musculus GN=Ywhah PE=1 SV=2                                                       | 1.037 | 1.041 | 1.039 | 1.262 | 1.284 | 1.165 |
| Importin subunit beta-1 OS=Mus musculus GN=Kpnb1 PE=1 SV=2                                                  | 0.869 | 0.945 | 0.907 | 1.412 | 1.479 | 1.367 |
| Proteasome subunit beta type-7 OS=Mus musculus GN=Psmb7 PE=1 SV=1                                           | 1.154 | 1.184 | 1.169 | 1.829 | 2.324 | 1.966 |
| Phosphatidylethanolamine-binding protein 1 OS=Mus musculus GN=Pebp1 PE=1 SV=3                               | 1.037 | 1.033 | 1.035 | 1.612 | 1.716 | 1.439 |
| Histidine triad nucleotide-binding protein 1 OS=Mus musculus GN=Hint1 PE=1 SV=3                             | 1.000 | 1.102 | 1.051 | 2.247 | 2.434 | 1.947 |
| Ubiquitin fusion degradation protein 1 homolog OS=Mus musculus GN=Ufd1l PE=1 SV=2                           | 0.987 | 0.967 | 0.977 | 1.037 | 0.929 | 1.114 |
| ELAV-like protein 1 OS=Mus musculus GN=Elavl1 PE=1 SV=2                                                     | 1.090 | 0.936 | 1.013 | 0.970 | 0.931 | 1.154 |
| Tumor suppressor p53-binding protein 1 OS=Mus                                                               | 1.000 | 1.314 | 1.157 | 1.508 | 1.149 | 1.718 |

|                                                                                                              |       |       |       |        |        |        |
|--------------------------------------------------------------------------------------------------------------|-------|-------|-------|--------|--------|--------|
| musculus GN=Tp53bp1 PE=1 SV=2                                                                                |       |       |       |        |        |        |
| Exostosin-2 OS=Mus musculus GN=Ext2 PE=1 SV=2                                                                | 1.013 | 1.056 | 1.034 | 1.076  | 0.955  | 0.944  |
| Na(+)/H(+) exchange regulatory cofactor NHE-RF1 OS=Mus musculus GN=Slc9a3r1 PE=1 SV=3                        | 1.128 | 1.028 | 1.078 | 1.166  | 1.208  | 1.227  |
| Vasodilator-stimulated phosphoprotein OS=Mus musculus GN=Vasp PE=1 SV=4                                      | 1.000 | 0.853 | 0.926 | 1.024  | 0.989  | 1.016  |
| Nascent polypeptide-associated complex subunit alpha, muscle-specific form OS=Mus musculus GN=Naca PE=1 SV=2 | 1.120 | 1.109 | 1.114 | 1.494  | 1.775  | 1.404  |
| Caspase-3 OS=Mus musculus GN=Casp3 PE=1 SV=1                                                                 | 1.000 | 1.263 | 1.131 | 0.934  | 1.143  | 0.984  |
| CTP synthase 1 OS=Mus musculus GN=Ctps1 PE=1 SV=2                                                            | 1.000 | 0.879 | 0.940 | 0.920  | 0.781  | 0.878  |
| Lysosomal alpha-glucosidase OS=Mus musculus GN=Gaa PE=1 SV=2                                                 | 1.000 | 0.902 | 0.951 | 0.807  | 0.722  | 0.946  |
| T-complex protein 1 subunit eta OS=Mus musculus GN=Cct7 PE=1 SV=1                                            | 1.020 | 1.102 | 1.061 | 1.455  | 1.602  | 1.297  |
| T-complex protein 1 subunit beta OS=Mus musculus GN=Cct2 PE=1 SV=4                                           | 1.092 | 1.018 | 1.055 | 1.256  | 1.388  | 1.135  |
| T-complex protein 1 subunit delta OS=Mus musculus GN=Cct4 PE=1 SV=3                                          | 1.057 | 1.136 | 1.096 | 1.207  | 1.244  | 1.331  |
| T-complex protein 1 subunit epsilon OS=Mus musculus GN=Cct5 PE=1 SV=1                                        | 1.000 | 0.979 | 0.989 | 1.161  | 1.381  | 1.147  |
| T-complex protein 1 subunit zeta OS=Mus musculus GN=Cct6a PE=1 SV=3                                          | 1.008 | 0.937 | 0.972 | 1.154  | 1.308  | 1.271  |
| T-complex protein 1 subunit gamma OS=Mus musculus GN=Cct3 PE=1 SV=1                                          | 0.954 | 1.078 | 1.016 | 1.397  | 1.511  | 1.314  |
| Nucleobindin-2 OS=Mus musculus GN=Nucb2 PE=1 SV=2                                                            | 1.041 | 1.066 | 1.053 | 1.145  | 0.870  | 1.267  |
| Transforming growth factor-beta-induced protein ig-h3 OS=Mus musculus GN=Tgfb1 PE=1 SV=1                     | 1.008 | 0.933 | 0.970 | 0.643  | 0.716  | 0.712  |
| Stromal interaction molecule 2 OS=Mus musculus GN=Stim2 PE=1 SV=2                                            | 1.000 | 0.846 | 0.923 | 0.888  | 0.655  | 0.904  |
| Chromobox protein homolog 1 OS=Mus musculus GN=Cbx1 PE=1 SV=1                                                | 1.000 | 1.161 | 1.080 | 1.007  | 1.481  | 1.303  |
| Transcription elongation factor B polypeptide 1 OS=Mus musculus GN=Tceb1 PE=1 SV=1                           | 1.032 | 1.010 | 1.021 | 1.133  | 1.210  | 1.090  |
| Enhancer of rudimentary homolog OS=Mus musculus GN=Erh PE=1 SV=1                                             | 1.000 | 0.994 | 0.997 | 2.852  | 2.044  | 2.262  |
| AP-2 complex subunit mu OS=Mus musculus GN=Ap2m1 PE=1 SV=1                                                   | 1.108 | 1.081 | 1.095 | 1.077  | 1.191  | 1.233  |
| Plasma protease C1 inhibitor OS=Mus musculus GN=Serp1g1 PE=1 SV=3                                            | 0.988 | 1.079 | 1.033 | 0.246  | 0.192  | 0.281  |
| Pigment epithelium-derived factor OS=Mus musculus GN=Serp1f1 PE=1 SV=2                                       | 0.977 | 0.967 | 0.972 | 0.859  | 0.680  | 0.853  |
| Secreted frizzled-related protein 2 OS=Mus musculus GN=Sfrp2 PE=2 SV=2                                       | 1.000 | 0.866 | 0.933 | 0.700  | 0.745  | 0.635  |
| Neuroplastin OS=Mus musculus GN=Nptn PE=1 SV=3                                                               | 1.000 | 0.675 | 0.837 | 0.487  | 0.444  | 0.347  |
| DNA replication licensing factor MCM2 OS=Mus musculus GN=Mcm2 PE=1 SV=3                                      | 1.000 | 0.919 | 0.959 | 1.277  | 1.080  | 1.146  |
| DNA replication licensing factor MCM6 OS=Mus musculus GN=Mcm6 PE=1 SV=1                                      | 0.975 | 0.921 | 0.948 | 1.014  | 1.327  | 1.225  |
| Cysteine and glycine-rich protein 1 OS=Mus musculus GN=Csrp1 PE=1 SV=3                                       | 1.070 | 1.086 | 1.078 | 0.929  | 0.982  | 0.967  |
| Nucleoredoxin OS=Mus musculus GN=Nxn PE=1 SV=1                                                               | 0.034 | 0.517 | 0.276 | 33.651 | 24.646 | 25.586 |
| 40S ribosomal protein S3a OS=Mus musculus GN=Rps3a PE=1 SV=3                                                 | 1.032 | 0.823 | 0.927 | 0.880  | 0.710  | 0.971  |
| Proteasome activator complex subunit 1 OS=Mus musculus GN=Psme1 PE=1 SV=2                                    | 0.969 | 0.933 | 0.951 | 1.323  | 1.303  | 1.209  |
| Ras GTPase-activating protein-binding protein 2                                                              | 1.000 | 0.832 | 0.916 | 1.318  | 0.864  | 1.323  |



|                                                                                                       |       |       |       |       |       |       |
|-------------------------------------------------------------------------------------------------------|-------|-------|-------|-------|-------|-------|
| OS=Mus musculus GN=G3bp2 PE=1 SV=2                                                                    |       |       |       |       |       |       |
| Potassium voltage-gated channel subfamily KQT member 1 OS=Mus musculus GN=Kcnq1 PE=1 SV=3             | 1.000 | 0.621 | 0.811 | 0.202 | 0.207 | 0.298 |
| Annexin A4 OS=Mus musculus GN=Anxa4 PE=1 SV=4                                                         | 1.000 | 0.647 | 0.823 | 0.213 | 0.226 | 0.254 |
| Myosin phosphatase Rho-interacting protein OS=Mus musculus GN=Mrip1 PE=1 SV=2                         | 1.000 | 1.024 | 1.012 | 1.215 | 1.206 | 1.306 |
| Peptidyl-glycine alpha-amidating monooxygenase OS=Mus musculus GN=Pam PE=1 SV=2                       | 1.045 | 1.059 | 1.052 | 0.637 | 0.554 | 0.694 |
| Glutamate--cysteine ligase catalytic subunit OS=Mus musculus GN=Gclc PE=1 SV=4                        | 1.000 | 1.158 | 1.079 | 1.270 | 1.284 | 1.249 |
| WW domain-binding protein 2 OS=Mus musculus GN=Wbp2 PE=1 SV=1                                         | 1.000 | 0.846 | 0.923 | 0.688 | 0.950 | 0.907 |
| Neogenin OS=Mus musculus GN=Neo1 PE=1 SV=1                                                            | 1.003 | 0.976 | 0.990 | 1.247 | 0.994 | 1.280 |
| Fumarate hydratase, mitochondrial OS=Mus musculus GN=Fh PE=1 SV=3                                     | 1.075 | 1.086 | 1.081 | 0.946 | 1.070 | 1.031 |
| Acidic leucine-rich nuclear phosphoprotein 32 family member E OS=Mus musculus GN=Anp32e PE=1 SV=2     | 1.000 | 0.859 | 0.930 | 1.452 | 1.660 | 1.319 |
| Hematological and neurological expressed 1 protein OS=Mus musculus GN=Hn1 PE=1 SV=3                   | 0.976 | 1.044 | 1.010 | 1.559 | 1.646 | 1.550 |
| Ras GTPase-activating protein-binding protein 1 OS=Mus musculus GN=G3bp1 PE=1 SV=1                    | 0.945 | 0.847 | 0.896 | 1.305 | 1.525 | 1.319 |
| A disintegrin and metalloproteinase with thrombospondin motifs 1 OS=Mus musculus GN=Adamts1 PE=1 SV=4 | 1.000 | 0.908 | 0.954 | 0.282 | 0.163 | 0.287 |
| Lysyl oxidase homolog 1 OS=Mus musculus GN=Loxl1 PE=2 SV=3                                            | 1.000 | 0.890 | 0.945 | 0.733 | 0.606 | 0.889 |
| Laminin subunit alpha-4 OS=Mus musculus GN=Lama4 PE=1 SV=2                                            | 1.062 | 1.128 | 1.095 | 0.481 | 0.465 | 0.606 |
| Vascular endothelial growth factor D OS=Mus musculus GN=Figf PE=2 SV=1                                | 1.000 | 0.775 | 0.887 | 0.582 | 0.620 | 0.814 |
| Bone morphogenetic protein 1 OS=Mus musculus GN=Bmp1 PE=1 SV=2                                        | 0.922 | 0.828 | 0.875 | 0.765 | 0.660 | 0.760 |
| Mannan-binding lectin serine protease 1 OS=Mus musculus GN=Masp1 PE=1 SV=2                            | 0.970 | 0.996 | 0.983 | 0.902 | 0.995 | 0.901 |
| Very low-density lipoprotein receptor OS=Mus musculus GN=Vldlr PE=1 SV=1                              | 1.000 | 0.869 | 0.935 | 0.708 | 0.415 | 0.410 |
| Tubulin beta-5 chain OS=Mus musculus GN=Tubb5 PE=1 SV=1                                               | 1.000 | 1.044 | 1.022 | 1.302 | 1.686 | 1.147 |
| Proteasome subunit beta type-4 OS=Mus musculus GN=Psb4 PE=1 SV=1                                      | 1.015 | 1.048 | 1.032 | 1.466 | 1.478 | 1.585 |
| 60S acidic ribosomal protein P2 OS=Mus musculus GN=Rplp2 PE=1 SV=3                                    | 1.008 | 1.029 | 1.018 | 1.626 | 1.602 | 1.467 |
| Peroxiredoxin-5, mitochondrial OS=Mus musculus GN=Prdx5 PE=1 SV=2                                     | 0.978 | 1.076 | 1.027 | 2.097 | 2.361 | 1.930 |
| Carboxypeptidase E OS=Mus musculus GN=Cpe PE=1 SV=2                                                   | 1.029 | 0.989 | 1.009 | 0.903 | 0.817 | 0.942 |
| Xanthine dehydrogenase/oxidase OS=Mus musculus GN=Xdh PE=1 SV=5                                       | 1.180 | 1.139 | 1.160 | 1.549 | 1.346 | 1.513 |
| Glucose-6-phosphate 1-dehydrogenase X OS=Mus musculus GN=G6pdx PE=1 SV=3                              | 0.992 | 0.964 | 0.978 | 1.334 | 1.237 | 1.238 |
| Apolipoprotein A-I OS=Mus musculus GN=Apoa1 PE=1 SV=2                                                 | 1.000 | 0.989 | 0.994 | 0.964 | 1.010 | 1.518 |
| Collagen alpha-1(VIII) chain OS=Mus musculus GN=Col8a1 PE=1 SV=3                                      | 1.000 | 0.988 | 0.994 | 0.503 | 0.455 | 0.558 |
| Retinol-binding protein 1 OS=Mus musculus GN=Rbp1 PE=1 SV=2                                           | 1.000 | 0.962 | 0.981 | 0.353 | 0.360 | 0.349 |
| Tyrosine-protein kinase receptor UFO OS=Mus musculus GN=Axl PE=1 SV=2                                 | 0.965 | 0.993 | 0.979 | 0.868 | 0.787 | 0.706 |

|                                                                                                         |       |       |       |       |       |       |
|---------------------------------------------------------------------------------------------------------|-------|-------|-------|-------|-------|-------|
| Heterogeneous nuclear ribonucleoprotein U-like protein 2 OS=Mus musculus GN=Hnrnpul2 PE=1 SV=2          | 1.000 | 0.876 | 0.938 | 1.081 | 1.253 | 1.421 |
| Collagen alpha-2(I) chain OS=Mus musculus GN=Col1a2 PE=1 SV=2                                           | 1.111 | 1.032 | 1.071 | 0.992 | 0.860 | 0.865 |
| Epidermal growth factor receptor OS=Mus musculus GN=Egfr PE=1 SV=1                                      | 1.000 | 1.034 | 1.017 | 0.989 | 1.062 | 1.462 |
| DNA topoisomerase 2-alpha OS=Mus musculus GN=Top2a PE=1 SV=2                                            | 1.000 | 1.036 | 1.018 | 1.509 | 1.299 | 1.544 |
| Protein transport protein Sec23A OS=Mus musculus GN=Sec23a PE=1 SV=2                                    | 0.925 | 1.066 | 0.995 | 1.271 | 1.167 | 1.199 |
| Guanylate-binding protein 1 OS=Mus musculus GN=Gbp1 PE=1 SV=1                                           | 1.000 | 0.824 | 0.912 | 0.586 | 0.641 | 1.106 |
| Growth arrest-specific protein 1 OS=Mus musculus GN=Gas1 PE=2 SV=2                                      | 0.998 | 1.080 | 1.039 | 1.246 | 1.545 | 1.511 |
| Ras suppressor protein 1 OS=Mus musculus GN=Rsu1 PE=1 SV=3                                              | 1.000 | 1.086 | 1.043 | 1.154 | 1.329 | 1.183 |
| Nucleoside diphosphate kinase B OS=Mus musculus GN=Nme2 PE=1 SV=1                                       | 0.709 | 0.782 | 0.745 | 1.452 | 1.947 | 1.455 |
| Transitional endoplasmic reticulum ATPase OS=Mus musculus GN=Vcp PE=1 SV=4                              | 1.047 | 1.147 | 1.097 | 0.671 | 0.770 | 0.649 |
| Ubiquitin-like modifier-activating enzyme 1 OS=Mus musculus GN=Uba1 PE=1 SV=1                           | 1.016 | 1.021 | 1.019 | 1.523 | 1.499 | 1.383 |
| Catenin beta-1 OS=Mus musculus GN=Ctnnb1 PE=1 SV=1                                                      | 1.000 | 0.995 | 0.997 | 0.963 | 0.846 | 0.952 |
| Myosin-6 OS=Mus musculus GN=Myh6 PE=1 SV=2                                                              | 1.000 | 1.096 | 1.048 | 0.280 | 0.353 | 0.527 |
| Collagen alpha-2(VI) chain OS=Mus musculus GN=Col6a2 PE=1 SV=3                                          | 1.000 | 0.970 | 0.985 | 0.898 | 0.796 | 1.007 |
| Nucleobindin-1 OS=Mus musculus GN=Nucb1 PE=1 SV=2                                                       | 1.215 | 1.214 | 1.215 | 1.445 | 1.327 | 1.291 |
| ATP synthase subunit alpha, mitochondrial OS=Mus musculus GN=Atp5a1 PE=1 SV=1                           | 1.000 | 0.902 | 0.951 | 0.703 | 0.458 | 0.810 |
| Thrombospondin-2 OS=Mus musculus GN=Thbs2 PE=1 SV=2                                                     | 1.008 | 1.039 | 1.023 | 0.871 | 0.926 | 0.757 |
| C-C motif chemokine 7 OS=Mus musculus GN=Ccl7 PE=3 SV=1                                                 | 1.010 | 0.996 | 1.003 | 0.654 | 0.732 | 0.640 |
| Secretogranin-2 OS=Mus musculus GN=Scg2 PE=1 SV=1                                                       | 1.000 | 0.779 | 0.890 | 0.784 | 0.614 | 0.638 |
| Potassium voltage-gated channel subfamily B member 1 OS=Mus musculus GN=Kcnb1 PE=1 SV=2                 | 1.000 | 0.945 | 0.972 | 0.653 | 0.672 | 0.713 |
| Prefoldin subunit 6 OS=Mus musculus GN=Pfdn6 PE=1 SV=1                                                  | 1.058 | 1.015 | 1.037 | 1.019 | 1.293 | 1.143 |
| Creatine kinase B-type OS=Mus musculus GN=Ckb PE=1 SV=1                                                 | 0.878 | 0.932 | 0.905 | 0.450 | 0.465 | 0.663 |
| Sphingomyelin phosphodiesterase OS=Mus musculus GN=Smpd1 PE=2 SV=2                                      | 1.000 | 0.896 | 0.948 | 0.662 | 0.390 | 0.689 |
| Collagen alpha-1(VI) chain OS=Mus musculus GN=Col6a1 PE=1 SV=1                                          | 1.085 | 1.170 | 1.128 | 1.055 | 0.884 | 1.020 |
| Inhibin beta A chain OS=Mus musculus GN=Inhba PE=1 SV=1                                                 | 1.000 | 0.906 | 0.953 | 0.806 | 0.679 | 0.685 |
| Reticulocalbin-1 OS=Mus musculus GN=Rcn1 PE=1 SV=1                                                      | 0.995 | 0.846 | 0.920 | 0.663 | 0.679 | 0.626 |
| Basement membrane-specific heparan sulfate proteoglycan core protein OS=Mus musculus GN=Hspg2 PE=1 SV=1 | 1.021 | 1.008 | 1.015 | 0.499 | 0.506 | 0.518 |
| Fatty acid-binding protein, epidermal OS=Mus musculus GN=Fabp5 PE=1 SV=3                                | 0.938 | 0.949 | 0.943 | 1.210 | 1.210 | 1.158 |
| Thrombospondin-3 OS=Mus musculus GN=Thbs3 PE=1 SV=2                                                     | 1.022 | 1.035 | 1.028 | 1.148 | 0.902 | 1.095 |
| La-related protein 7 OS=Mus musculus GN=Larp7                                                           | 1.000 | 1.924 | 1.462 | 1.527 | 1.100 | 1.700 |

|                                                                                                 |       |        |       |        |        |        |
|-------------------------------------------------------------------------------------------------|-------|--------|-------|--------|--------|--------|
| PE=1 SV=2                                                                                       |       |        |       |        |        |        |
| Eukaryotic translation initiation factor 5B OS=Mus musculus GN=Eif5b PE=1 SV=2                  | 1.000 | 1.059  | 1.029 | 1.651  | 1.639  | 1.589  |
| Calcium-binding protein 39 OS=Mus musculus GN=Cab39 PE=1 SV=2                                   | 1.000 | 0.915  | 0.958 | 1.585  | 1.751  | 1.431  |
| Amyloid-like protein 2 OS=Mus musculus GN=Aplp2 PE=1 SV=4                                       | 1.000 | 1.081  | 1.041 | 0.599  | 0.510  | 0.737  |
| Clusterin OS=Mus musculus GN=Clu PE=1 SV=1                                                      | 1.081 | 1.123  | 1.102 | 0.417  | 0.307  | 0.379  |
| Glia-derived nexin OS=Mus musculus GN=Serpine2 PE=1 SV=2                                        | 1.004 | 1.132  | 1.068 | 1.373  | 1.228  | 1.341  |
| Galectin-3-binding protein OS=Mus musculus GN=Lgals3bp PE=1 SV=1                                | 1.036 | 1.040  | 1.038 | 0.563  | 0.445  | 0.564  |
| Apoptosis regulator BAX OS=Mus musculus GN=Bax PE=1 SV=1                                        | 1.000 | 1.145  | 1.072 | 1.182  | 0.995  | 1.044  |
| Core-binding factor subunit beta OS=Mus musculus GN=Cbfb PE=1 SV=1                              | 1.000 | 0.838  | 0.919 | 0.803  | 0.851  | 0.896  |
| Hepatocyte growth factor OS=Mus musculus GN=Hgf PE=1 SV=1                                       | 1.000 | 1.055  | 1.028 | 0.889  | 0.914  | 0.848  |
| Calponin-1 OS=Mus musculus GN=Cnn1 PE=1 SV=1                                                    | 0.956 | 0.872  | 0.914 | 1.172  | 1.550  | 1.300  |
| Calponin-2 OS=Mus musculus GN=Cnn2 PE=1 SV=1                                                    | 0.976 | 1.109  | 1.043 | 1.241  | 1.391  | 1.562  |
| Cell growth-regulating nucleolar protein OS=Mus musculus GN=Lyar PE=1 SV=2                      | 0.984 | 1.511  | 1.248 | 1.935  | 1.702  | 2.342  |
| Vitamin K-dependent protein S OS=Mus musculus GN=Pros1 PE=2 SV=1                                | 1.000 | 0.768  | 0.884 | 0.639  | 0.603  | 0.543  |
| Fibulin-1 OS=Mus musculus GN=Fbln1 PE=1 SV=2                                                    | 0.953 | 0.948  | 0.950 | 0.883  | 0.775  | 0.762  |
| FACT complex subunit SSRP1 OS=Mus musculus GN=Ssrp1 PE=1 SV=2                                   | 1.000 | 0.952  | 0.976 | 1.354  | 1.144  | 1.781  |
| Inverted formin-2 OS=Mus musculus GN=Inf2 PE=1 SV=1                                             | 1.000 | 0.873  | 0.937 | 0.846  | 0.572  | 0.925  |
| Serine/threonine-protein phosphatase 4 regulatory subunit 2 OS=Mus musculus GN=Ppp4r2 PE=1 SV=1 | 1.000 | 0.893  | 0.947 | 1.115  | 0.685  | 0.958  |
| Regulator of telomere elongation helicase 1 OS=Mus musculus GN=Rtel1 PE=1 SV=2                  | 1.000 | 0.784  | 0.892 | 0.996  | 0.668  | 0.851  |
| Puromycin-sensitive aminopeptidase OS=Mus musculus GN=Npepps PE=1 SV=2                          | 0.876 | 0.827  | 0.852 | 0.841  | 0.866  | 0.914  |
| Ubiquilin-like protein OS=Mus musculus GN=Ubqln1 PE=1 SV=2                                      | 1.000 | 0.894  | 0.947 | 2.334  | 2.735  | 2.019  |
| tRNA (cytosine(34)-C(5))-methyltransferase OS=Mus musculus GN=Nsun2 PE=1 SV=2                   | 1.000 | 0.912  | 0.956 | 0.949  | 0.823  | 0.820  |
| Transmembrane channel-like protein 5 OS=Mus musculus GN=Tmc5 PE=2 SV=1                          | 1.000 | 0.979  | 0.990 | 0.984  | 0.700  | 0.949  |
| Putative phospholipase B-like 2 OS=Mus musculus GN=Plbd2 PE=1 SV=2                              | 1.019 | 1.002  | 1.010 | 0.849  | 0.865  | 0.868  |
| Myosin regulatory light chain 12B OS=Mus musculus GN=Myl12b PE=1 SV=2                           | 1.032 | 1.158  | 1.095 | 1.238  | 1.319  | 1.044  |
| General transcription factor IIF subunit 1 OS=Mus musculus GN=Gtf2f1 PE=1 SV=2                  | 1.000 | 0.773  | 0.887 | 1.259  | 1.209  | 1.017  |
| GMP synthase [glutamine-hydrolyzing] OS=Mus musculus GN=Gmps PE=1 SV=2                          | 1.000 | 0.814  | 0.907 | 0.840  | 0.923  | 0.883  |
| S-adenosylmethionine synthase isoform type-2 OS=Mus musculus GN=Mat2a PE=1 SV=2                 | 1.000 | 1.023  | 1.011 | 1.213  | 1.110  | 1.245  |
| PDZ and LIM domain protein 7 OS=Mus musculus GN=Pdlm7 PE=1 SV=1                                 | 1.000 | 1.010  | 1.005 | 1.207  | 1.054  | 1.250  |
| Protein FAM98A OS=Mus musculus GN=Fam98a PE=1 SV=1                                              | 1.000 | 1.192  | 1.096 | 1.314  | 1.618  | 0.795  |
| Transcription activator BRG1 OS=Mus musculus GN=Smarca4 PE=1 SV=1                               | 1.000 | 11.385 | 6.192 | 76.718 | 92.420 | 89.855 |
| Keratin, type II cytoskeletal 2 epidermal OS=Mus musculus GN=Krt2 PE=1 SV=1                     | 1.070 | 0.928  | 0.999 | 0.641  | 0.700  | 0.681  |
| UDP-N-acetylhexosamine pyrophosphorylase-like                                                   | 1.023 | 1.212  | 1.117 | 1.292  | 1.112  | 1.546  |

|                                                                                                    |       |       |       |       |       |       |
|----------------------------------------------------------------------------------------------------|-------|-------|-------|-------|-------|-------|
| protein 1 OS=Mus musculus GN=Uap1l1 PE=1 SV=1                                                      |       |       |       |       |       |       |
| 26S proteasome non-ATPase regulatory subunit 1 OS=Mus musculus GN=Psmc1 PE=1 SV=1                  | 0.963 | 1.075 | 1.019 | 1.215 | 1.170 | 1.316 |
| Far upstream element-binding protein 2 OS=Mus musculus GN=Khsrp PE=1 SV=2                          | 0.987 | 0.900 | 0.944 | 1.065 | 1.102 | 1.053 |
| DNA damage-binding protein 1 OS=Mus musculus GN=Ddb1 PE=1 SV=2                                     | 1.000 | 0.979 | 0.990 | 1.112 | 1.304 | 1.139 |
| Valine--tRNA ligase, mitochondrial OS=Mus musculus GN=Vars2 PE=1 SV=2                              | 1.000 | 0.939 | 0.969 | 0.899 | 0.736 | 1.246 |
| Protein transport protein Sec24A OS=Mus musculus GN=Sec24a PE=1 SV=1                               | 1.000 | 0.861 | 0.930 | 0.613 | 0.620 | 1.234 |
| OTU domain-containing protein 5 OS=Mus musculus GN=Otud5 PE=1 SV=2                                 | 1.000 | 0.928 | 0.964 | 0.727 | 0.816 | 1.055 |
| E3 ubiquitin-protein ligase HECTD3 OS=Mus musculus GN=Hectd3 PE=1 SV=2                             | 1.000 | 1.786 | 1.393 | 3.076 | 1.731 | 2.792 |
| Collagen alpha-2(V) chain OS=Mus musculus GN=Col5a2 PE=1 SV=1                                      | 0.987 | 0.975 | 0.981 | 0.465 | 0.364 | 0.480 |
| Tubulin--tyrosine ligase-like protein 12 OS=Mus musculus GN=Ttl12 PE=1 SV=1                        | 1.000 | 1.177 | 1.088 | 1.010 | 1.196 | 1.118 |
| Ubiquitin-conjugating enzyme E2 Z OS=Mus musculus GN=Ube2z PE=1 SV=2                               | 1.000 | 1.045 | 1.022 | 1.312 | 1.094 | 1.378 |
| Poly(U)-binding-splicing factor PUF60 OS=Mus musculus GN=Puf60 PE=1 SV=2                           | 0.931 | 0.800 | 0.865 | 0.806 | 0.749 | 0.761 |
| RING finger and transmembrane domain-containing protein 2 OS=Mus musculus GN=Rnft2 PE=2 SV=2       | 1.000 | 1.079 | 1.039 | 1.220 | 0.695 | 1.251 |
| Eukaryotic translation initiation factor 3 subunit J-A OS=Mus musculus GN=Eif3j1 PE=2 SV=1         | 1.000 | 1.080 | 1.040 | 1.581 | 1.618 | 1.654 |
| AP2-associated protein kinase 1 OS=Mus musculus GN=Aak1 PE=1 SV=2                                  | 1.000 | 0.829 | 0.914 | 1.654 | 1.089 | 0.932 |
| 28 kDa heat- and acid-stable phosphoprotein OS=Mus musculus GN=Pdap1 PE=1 SV=1                     | 0.999 | 0.947 | 0.973 | 1.146 | 1.375 | 1.010 |
| BRISC and BRCA1-A complex member 1 OS=Mus musculus GN=Babam1 PE=1 SV=1                             | 1.000 | 0.906 | 0.953 | 0.881 | 0.862 | 0.632 |
| Rho GTPase-activating protein 17 OS=Mus musculus GN=Arhgap17 PE=1 SV=1                             | 1.000 | 0.840 | 0.920 | 0.832 | 0.932 | 0.416 |
| Enhancer of mRNA-decapping protein 4 OS=Mus musculus GN=Edc4 PE=1 SV=2                             | 1.000 | 1.177 | 1.089 | 0.963 | 1.013 | 1.170 |
| Protein C8orf37 homolog OS=Mus musculus PE=1 SV=1                                                  | 1.000 | 1.229 | 1.114 | 1.087 | 0.794 | 1.287 |
| Protein phosphatase 1 regulatory subunit 7 OS=Mus musculus GN=Ppp1r7 PE=1 SV=2                     | 1.000 | 1.075 | 1.037 | 0.892 | 0.893 | 1.565 |
| Protein PRRC1 OS=Mus musculus GN=Prcc1 PE=1 SV=1                                                   | 1.000 | 0.820 | 0.910 | 0.714 | 0.684 | 1.045 |
| Protein transport protein Sec31A OS=Mus musculus GN=Sec31a PE=1 SV=2                               | 1.018 | 0.996 | 1.007 | 1.054 | 1.165 | 1.249 |
| Peroxidasin homolog OS=Mus musculus GN=Pxdn PE=1 SV=2                                              | 1.000 | 1.075 | 1.038 | 0.785 | 0.746 | 0.781 |
| Transforming growth factor-beta receptor-associated protein 1 OS=Mus musculus GN=Tgfbra1 PE=1 SV=1 | 1.000 | 1.179 | 1.090 | 2.458 | 2.441 | 2.121 |
| Keratin, type II cytoskeletal 2 OS=Mus musculus GN=Krt76 PE=1 SV=1                                 | 1.000 | 0.776 | 0.888 | 0.237 | 0.231 | 0.347 |
| Leucine-rich repeat flightless-interacting protein 1 OS=Mus musculus GN=Lrrfip1 PE=1 SV=2          | 1.000 | 1.094 | 1.047 | 0.878 | 0.760 | 0.985 |
| Protein sel-1 homolog 2 OS=Mus musculus GN=Sel1l2 PE=2 SV=1                                        | 1.000 | 1.088 | 1.044 | 1.401 | 0.951 | 1.985 |
| Olfactomedin-like protein 2B OS=Mus musculus GN=Olfml2b PE=1 SV=2                                  | 1.000 | 0.948 | 0.974 | 0.839 | 0.595 | 0.940 |
| Immunoglobulin superfamily member 10 OS=Mus                                                        | 1.000 | 0.948 | 0.974 | 0.943 | 0.874 | 1.063 |

|                                                                                                    |       |       |       |       |       |       |
|----------------------------------------------------------------------------------------------------|-------|-------|-------|-------|-------|-------|
| musculus GN=Igsf10 PE=2 SV=2                                                                       |       |       |       |       |       |       |
| Cytoplasmic dynein 2 heavy chain 1 OS=Mus musculus GN=Dync2h1 PE=1 SV=1                            | 1.000 | 1.227 | 1.114 | 1.039 | 1.060 | 0.962 |
| Costars family protein ABRACL OS=Mus musculus GN=Abrac1 PE=1 SV=1                                  | 1.000 | 1.054 | 1.027 | 1.477 | 1.458 | 1.351 |
| 1-phosphatidylinositol 4,5-bisphosphate phosphodiesterase eta-1 OS=Mus musculus GN=Plch1 PE=2 SV=1 | 1.000 | 1.427 | 1.214 | 1.361 | 1.158 | 1.268 |
| Coiled-coil domain-containing protein 88B OS=Mus musculus GN=Ccdc88b PE=1 SV=2                     | 1.000 | 0.872 | 0.936 | 0.673 | 0.600 | 0.655 |
| Sister chromatid cohesion protein PDS5 homolog B OS=Mus musculus GN=Pds5b PE=1 SV=1                | 1.000 | 0.861 | 0.931 | 0.789 | 0.554 | 0.867 |
| Protein CDV3 OS=Mus musculus GN=Cdv3 PE=1 SV=2                                                     | 0.937 | 0.888 | 0.912 | 1.079 | 0.914 | 0.939 |
| Probable ATP-dependent RNA helicase DDX17 OS=Mus musculus GN=Ddx17 PE=1 SV=1                       | 1.000 | 0.820 | 0.910 | 0.875 | 0.842 | 0.817 |
| Nuclear receptor subfamily 2 group C member 1 OS=Mus musculus GN=Nr2c1 PE=1 SV=3                   | 1.000 | 1.545 | 1.273 | 1.450 | 1.661 | 1.576 |
| Leucine-rich repeat-containing protein 47 OS=Mus musculus GN=Lrrc47 PE=1 SV=1                      | 1.000 | 1.114 | 1.057 | 0.899 | 0.966 | 1.376 |
| Thyroid hormone receptor-associated protein 3 OS=Mus musculus GN=Thrap3 PE=1 SV=1                  | 1.000 | 1.454 | 1.227 | 1.745 | 1.585 | 2.221 |
| N-acetylgalactosamine-6-sulfatase OS=Mus musculus GN=Galns PE=1 SV=2                               | 1.000 | 0.764 | 0.882 | 0.829 | 0.781 | 0.625 |
| Aldehyde dehydrogenase family 16 member A1 OS=Mus musculus GN=Aldh16a1 PE=1 SV=2                   | 1.000 | 0.837 | 0.918 | 0.695 | 0.450 | 0.687 |
| C-Jun-amino-terminal kinase-interacting protein 4 OS=Mus musculus GN=Spag9 PE=1 SV=2               | 1.000 | 1.255 | 1.128 | 1.289 | 1.473 | 1.869 |
| Rho GTPase-activating protein 1 OS=Mus musculus GN=Arhgap1 PE=1 SV=1                               | 1.000 | 1.241 | 1.121 | 0.764 | 0.865 | 0.922 |
| Vacuolar protein sorting-associated protein 13A OS=Mus musculus GN=Vps13a PE=1 SV=1                | 1.000 | 0.884 | 0.942 | 0.420 | 0.442 | 0.588 |
| Serine protease inhibitor A3G OS=Mus musculus GN=Serpina3g PE=1 SV=2                               | 1.000 | 0.882 | 0.941 | 0.814 | 0.854 | 1.034 |
| Mediator of DNA damage checkpoint protein 1 OS=Mus musculus GN=Mdc1 PE=1 SV=1                      | 1.000 | 0.925 | 0.963 | 1.046 | 0.695 | 0.824 |
| Phosphoribosylformylglycinamide synthase OS=Mus musculus GN=Pfas PE=1 SV=1                         | 1.028 | 1.284 | 1.156 | 1.193 | 1.046 | 1.221 |
| Clustered mitochondria protein homolog OS=Mus musculus GN=Cluh PE=1 SV=2                           | 0.893 | 1.061 | 0.977 | 0.455 | 0.608 | 0.612 |
| Coatomer subunit delta OS=Mus musculus GN=Arcn1 PE=1 SV=2                                          | 1.000 | 0.935 | 0.967 | 1.554 | 1.138 | 1.345 |
| Myosin light polypeptide 6 OS=Mus musculus GN=Myl6 PE=1 SV=3                                       | 1.009 | 1.101 | 1.055 | 1.073 | 1.156 | 1.030 |
| Growth factor receptor-bound protein 2 OS=Mus musculus GN=Grb2 PE=1 SV=1                           | 0.974 | 0.992 | 0.983 | 1.100 | 1.110 | 0.995 |
| Ganglioside GM2 activator OS=Mus musculus GN=Gm2a PE=1 SV=2                                        | 1.020 | 0.975 | 0.998 | 0.948 | 0.930 | 0.842 |
| Heterogeneous nuclear ribonucleoprotein D0 OS=Mus musculus GN=Hnnpd PE=1 SV=2                      | 0.971 | 0.902 | 0.937 | 1.396 | 1.626 | 1.350 |
| Laminin subunit alpha-2 OS=Mus musculus GN=Lama2 PE=1 SV=2                                         | 1.000 | 1.024 | 1.012 | 0.422 | 0.329 | 0.422 |
| Serine/threonine-protein phosphatase 5 OS=Mus musculus GN=Ppp5c PE=1 SV=3                          | 1.000 | 0.934 | 0.967 | 1.108 | 1.103 | 1.693 |
| Proteasome subunit beta type-6 OS=Mus musculus GN=Psm6 PE=1 SV=3                                   | 1.232 | 1.284 | 1.258 | 2.029 | 1.481 | 1.409 |
| Deoxynucleoside triphosphate triphosphohydrolase SAMHD1 OS=Mus musculus GN=Samhd1 PE=1 SV=2        | 1.000 | 0.922 | 0.961 | 1.230 | 1.069 | 1.067 |
| Prolyl 4-hydroxylase subunit alpha-1 OS=Mus musculus GN=P4ha1 PE=1 SV=2                            | 1.000 | 0.979 | 0.989 | 0.591 | 0.998 | 0.646 |

|                                                                                                                        |       |       |       |       |       |       |
|------------------------------------------------------------------------------------------------------------------------|-------|-------|-------|-------|-------|-------|
| BAG family molecular chaperone regulator 1<br>OS=Mus musculus GN=Bag1 PE=1 SV=3                                        | 1.000 | 0.884 | 0.942 | 0.900 | 0.893 | 0.755 |
| KH domain-containing, RNA-binding, signal<br>transduction-associated protein 1 OS=Mus<br>musculus GN=Khdrbs1 PE=1 SV=2 | 1.000 | 1.338 | 1.169 | 1.498 | 1.689 | 1.637 |
| Growth arrest-specific protein 8 OS=Mus<br>musculus GN=Gas8 PE=1 SV=2                                                  | 1.000 | 0.902 | 0.951 | 2.580 | 3.636 | 2.620 |
| Collagen alpha-1(XII) chain OS=Mus musculus<br>GN=Col12a1 PE=2 SV=3                                                    | 0.965 | 0.980 | 0.973 | 0.549 | 0.602 | 0.591 |
| Serpin B6 OS=Mus musculus GN=Serpnb6 PE=1<br>SV=1                                                                      | 0.921 | 0.944 | 0.932 | 1.139 | 1.058 | 1.041 |
| Stress-induced-phosphoprotein 1 OS=Mus<br>musculus GN=Stip1 PE=1 SV=1                                                  | 0.941 | 0.898 | 0.920 | 1.449 | 1.817 | 1.453 |
| Caprin-1 OS=Mus musculus GN=Caprin1 PE=1<br>SV=2                                                                       | 0.993 | 0.921 | 0.957 | 1.209 | 1.250 | 1.204 |
| Eukaryotic translation initiation factor 4E-binding<br>protein 1 OS=Mus musculus GN=Eif4ebp1 PE=1<br>SV=3              | 0.948 | 0.996 | 0.972 | 1.019 | 0.835 | 1.000 |
| Epidermal growth factor receptor substrate 15-<br>like 1 OS=Mus musculus GN=Eps15l1 PE=1 SV=3                          | 1.000 | 1.281 | 1.141 | 1.927 | 1.971 | 1.940 |
| Centrosome-associated protein CEP250 OS=Mus<br>musculus GN=Cep250 PE=1 SV=4                                            | 1.000 | 0.958 | 0.979 | 0.761 | 0.850 | 1.032 |
| Histone-binding protein RBBP4 OS=Mus musculus<br>GN=Rbbp4 PE=1 SV=5                                                    | 0.993 | 1.064 | 1.029 | 1.000 | 1.060 | 1.176 |
| Histone-binding protein RBBP7 OS=Mus musculus<br>GN=Rbbp7 PE=1 SV=1                                                    | 1.000 | 0.968 | 0.984 | 1.373 | 1.629 | 1.496 |
| Laminin subunit alpha-5 OS=Mus musculus<br>GN=Lama5 PE=1 SV=4                                                          | 1.000 | 1.042 | 1.021 | 0.507 | 0.437 | 0.644 |
| Asparagine synthetase [glutamine-hydrolyzing]<br>OS=Mus musculus GN=Asns PE=1 SV=3                                     | 0.773 | 0.988 | 0.880 | 1.240 | 1.597 | 1.356 |
| Lamina-associated polypeptide 2, isoforms<br>beta/delta/epsilon/gamma OS=Mus musculus<br>GN=Tmpo PE=1 SV=4             | 1.029 | 1.108 | 1.069 | 1.597 | 1.388 | 1.672 |
| Histidine--tRNA ligase, cytoplasmic OS=Mus<br>musculus GN=Hars PE=1 SV=2                                               | 1.003 | 0.909 | 0.956 | 1.500 | 1.612 | 1.499 |
| Hsp90 co-chaperone Cdc37 OS=Mus musculus<br>GN=Cdc37 PE=1 SV=1                                                         | 0.918 | 0.859 | 0.889 | 1.323 | 1.521 | 1.440 |
| 45 kDa calcium-binding protein OS=Mus musculus<br>GN=Sdf4 PE=1 SV=1                                                    | 1.000 | 0.983 | 0.992 | 0.747 | 0.831 | 0.967 |
| Ceruloplasmin OS=Mus musculus GN=Cp PE=1<br>SV=2                                                                       | 1.014 | 1.052 | 1.033 | 1.355 | 1.075 | 1.392 |
| Microtubule-associated protein RP/EB family<br>member 1 OS=Mus musculus GN=Mapre1 PE=1<br>SV=3                         | 1.000 | 1.099 | 1.049 | 0.925 | 1.092 | 0.903 |
| Peroxiredoxin-2 OS=Mus musculus GN=Prdx2<br>PE=1 SV=3                                                                  | 0.982 | 0.978 | 0.980 | 1.587 | 1.683 | 1.569 |
| Methylosome subunit pICln OS=Mus musculus<br>GN=Clns1a PE=1 SV=1                                                       | 1.000 | 1.153 | 1.076 | 1.316 | 0.871 | 1.306 |
| Host cell factor 1 OS=Mus musculus GN=Hcfc1<br>PE=1 SV=2                                                               | 1.000 | 0.965 | 0.983 | 1.354 | 1.374 | 1.714 |
| Platelet-activating factor acetylhydrolase IB<br>subunit gamma OS=Mus musculus GN=Pafah1b3<br>PE=1 SV=1                | 1.000 | 0.903 | 0.951 | 0.778 | 0.778 | 0.927 |
| Platelet-activating factor acetylhydrolase IB<br>subunit beta OS=Mus musculus GN=Pafah1b2<br>PE=1 SV=2                 | 1.334 | 1.353 | 1.343 | 1.363 | 1.342 | 1.236 |
| Prosaposin OS=Mus musculus GN=Psap PE=1 SV=2                                                                           | 1.081 | 1.079 | 1.080 | 0.957 | 0.946 | 0.880 |
| Beta-2-syntrophin OS=Mus musculus GN=Sntb2<br>PE=1 SV=2                                                                | 1.000 | 0.862 | 0.931 | 0.764 | 0.737 | 0.911 |
| Collagen alpha-1(XI) chain OS=Mus musculus<br>GN=Col11a1 PE=1 SV=2                                                     | 1.005 | 1.036 | 1.020 | 0.521 | 0.406 | 0.670 |

|                                                                                                |       |       |       |       |       |       |
|------------------------------------------------------------------------------------------------|-------|-------|-------|-------|-------|-------|
| Laminin subunit beta-2 OS=Mus musculus<br>GN=Lamb2 PE=1 SV=2                                   | 1.044 | 0.945 | 0.995 | 0.486 | 0.394 | 0.540 |
| Catenin alpha-2 OS=Mus musculus GN=Ctnna2<br>PE=1 SV=3                                         | 1.000 | 1.503 | 1.252 | 1.040 | 1.427 | 1.370 |
| Heat shock 70 kDa protein 4 OS=Mus musculus<br>GN=Hspa4 PE=1 SV=1                              | 1.044 | 1.078 | 1.061 | 1.596 | 1.834 | 1.491 |
| B-cell receptor-associated protein 31 OS=Mus<br>musculus GN=Bcap31 PE=1 SV=4                   | 1.000 | 1.110 | 1.055 | 1.005 | 0.995 | 1.055 |
| Procollagen C-endopeptidase enhancer 1 OS=Mus<br>musculus GN=Pcolce PE=1 SV=2                  | 1.122 | 1.078 | 1.100 | 1.045 | 1.040 | 1.010 |
| Keratin, type I cytoskeletal 15 OS=Mus musculus<br>GN=Krt15 PE=1 SV=2                          | 1.000 | 0.724 | 0.862 | 0.209 | 0.308 | 0.185 |
| H(+)/Cl(-) exchange transporter 4 OS=Mus<br>musculus GN=Clcn4 PE=2 SV=2                        | 1.000 | 1.313 | 1.157 | 1.079 | 0.814 | 1.794 |
| Mesothelin OS=Mus musculus GN=Msln PE=1 SV=1                                                   | 0.928 | 0.864 | 0.896 | 1.374 | 1.339 | 1.456 |
| Delta-like protein 1 OS=Mus musculus GN=Dll1<br>PE=1 SV=2                                      | 1.000 | 0.856 | 0.928 | 0.956 | 0.764 | 1.496 |
| Extracellular matrix protein 1 OS=Mus musculus<br>GN=Ecm1 PE=1 SV=2                            | 1.024 | 0.983 | 1.004 | 0.722 | 0.680 | 0.649 |
| RNA-binding protein EWS OS=Mus musculus<br>GN=Ewsr1 PE=1 SV=2                                  | 1.053 | 1.185 | 1.119 | 1.804 | 1.805 | 1.691 |
| Double-strand-break repair protein rad21<br>homolog OS=Mus musculus GN=Rad21 PE=1 SV=3         | 1.000 | 0.873 | 0.936 | 0.533 | 0.535 | 0.568 |
| Fascin OS=Mus musculus GN=Fscn1 PE=1 SV=4                                                      | 1.066 | 1.076 | 1.071 | 1.011 | 1.123 | 1.013 |
| Fibrillin-1 OS=Mus musculus GN=Fbn1 PE=1 SV=1                                                  | 1.038 | 1.057 | 1.047 | 0.375 | 0.353 | 0.410 |
| Peptidyl-prolyl cis-trans isomerase FKBP10<br>OS=Mus musculus GN=Fkbp10 PE=1 SV=2              | 0.957 | 1.000 | 0.979 | 0.827 | 0.819 | 0.922 |
| Insulin-like growth factor-binding protein 7<br>OS=Mus musculus GN=Igfbp7 PE=1 SV=3            | 1.029 | 1.040 | 1.035 | 0.598 | 0.586 | 0.589 |
| Kinectin OS=Mus musculus GN=Ktn1 PE=1 SV=1                                                     | 1.040 | 1.102 | 1.071 | 0.949 | 1.055 | 1.200 |
| Rab GDP dissociation inhibitor beta OS=Mus<br>musculus GN=Gdi2 PE=1 SV=1                       | 1.033 | 0.994 | 1.014 | 1.265 | 1.406 | 1.293 |
| Rho GDP-dissociation inhibitor 2 OS=Mus<br>musculus GN=Arhgdib PE=1 SV=3                       | 1.000 | 1.052 | 1.026 | 0.676 | 0.696 | 0.729 |
| Probable ATP-dependent RNA helicase DDX5<br>OS=Mus musculus GN=Ddx5 PE=1 SV=2                  | 1.000 | 0.953 | 0.977 | 1.244 | 1.526 | 1.281 |
| Chromobox protein homolog 5 OS=Mus musculus<br>GN=Cbx5 PE=1 SV=1                               | 1.000 | 0.906 | 0.953 | 2.039 | 2.510 | 1.616 |
| Heat shock protein 105 kDa OS=Mus musculus<br>GN=Hsph1 PE=1 SV=2                               | 0.905 | 0.880 | 0.892 | 0.979 | 1.034 | 0.972 |
| Inter-alpha-trypsin inhibitor heavy chain H1<br>OS=Mus musculus GN=Itih1 PE=1 SV=2             | 1.000 | 1.292 | 1.146 | 1.659 | 1.413 | 3.075 |
| Inter-alpha-trypsin inhibitor heavy chain H2<br>OS=Mus musculus GN=Itih2 PE=1 SV=1             | 1.067 | 1.050 | 1.059 | 1.038 | 0.798 | 1.020 |
| Inter-alpha-trypsin inhibitor heavy chain H3<br>OS=Mus musculus GN=Itih3 PE=1 SV=3             | 0.995 | 1.014 | 1.004 | 0.950 | 0.799 | 1.228 |
| Interleukin-1 receptor accessory protein OS=Mus<br>musculus GN=Il1rap PE=1 SV=1                | 1.000 | 0.957 | 0.979 | 0.938 | 0.622 | 1.093 |
| D-3-phosphoglycerate dehydrogenase OS=Mus<br>musculus GN=Phgdh PE=1 SV=3                       | 0.966 | 1.004 | 0.985 | 1.336 | 1.346 | 1.523 |
| Kinesin-1 heavy chain OS=Mus musculus<br>GN=Kif5b PE=1 SV=3                                    | 1.035 | 1.082 | 1.059 | 1.244 | 1.143 | 1.246 |
| Keratin, type I cytoskeletal 14 OS=Mus musculus<br>GN=Krt14 PE=1 SV=2                          | 1.000 | 0.820 | 0.910 | 0.402 | 0.423 | 0.546 |
| LIM and SH3 domain protein 1 OS=Mus musculus<br>GN=Lasp1 PE=1 SV=1                             | 1.101 | 1.014 | 1.057 | 0.937 | 0.840 | 0.843 |
| Lipopolysaccharide-binding protein OS=Mus<br>musculus GN=Lbp PE=1 SV=2                         | 0.998 | 0.963 | 0.980 | 0.788 | 0.561 | 0.951 |
| Latent-transforming growth factor beta-binding<br>protein 3 OS=Mus musculus GN=Ltbp3 PE=1 SV=3 | 1.000 | 1.047 | 1.024 | 1.040 | 1.006 | 0.918 |
| Alpha-2-macroglobulin OS=Mus musculus                                                          | 1.000 | 1.049 | 1.025 | 1.121 | 1.044 | 1.258 |

|                                                                                    |       |       |       |       |       |       |
|------------------------------------------------------------------------------------|-------|-------|-------|-------|-------|-------|
| GN=A2m PE=1 SV=3                                                                   |       |       |       |       |       |       |
| Myosin-10 OS=Mus musculus GN=Myh10 PE=1 SV=2                                       | 1.000 | 0.958 | 0.979 | 0.952 | 0.846 | 0.936 |
| Nucleophosmin OS=Mus musculus GN=Npm1 PE=1 SV=1                                    | 1.028 | 1.034 | 1.031 | 1.407 | 1.625 | 1.290 |
| Poly(rC)-binding protein 2 OS=Mus musculus GN=Pcbp2 PE=1 SV=1                      | 0.891 | 0.781 | 0.836 | 1.150 | 1.222 | 1.020 |
| Mimecan OS=Mus musculus GN=Ogn PE=1 SV=1                                           | 0.920 | 0.925 | 0.922 | 0.721 | 0.540 | 0.715 |
| Periostin OS=Mus musculus GN=Postn PE=1 SV=2                                       | 1.063 | 1.237 | 1.150 | 0.228 | 0.184 | 0.271 |
| Astrocytic phosphoprotein PEA-15 OS=Mus musculus GN=Pea15 PE=1 SV=1                | 1.000 | 0.930 | 0.965 | 0.883 | 0.859 | 0.760 |
| Versican core protein OS=Mus musculus GN=Vcan PE=1 SV=2                            | 1.072 | 1.081 | 1.077 | 0.884 | 0.868 | 0.950 |
| Protein kinase C iota type OS=Mus musculus GN=Prkci PE=1 SV=3                      | 1.000 | 0.693 | 0.846 | 0.964 | 1.253 | 0.895 |
| Protein phosphatase 1 regulatory subunit 14B OS=Mus musculus GN=Ppp1r14b PE=1 SV=2 | 1.000 | 0.852 | 0.926 | 1.336 | 0.832 | 1.007 |
| Serine/arginine-rich splicing factor 2 OS=Mus musculus GN=Srsf2 PE=1 SV=4          | 1.000 | 1.054 | 1.027 | 1.108 | 1.145 | 1.035 |
| Dystroglycan OS=Mus musculus GN=Dag1 PE=1 SV=4                                     | 0.953 | 0.961 | 0.957 | 0.921 | 0.806 | 0.946 |
| Dihydropyrimidinase-related protein 3 OS=Mus musculus GN=Dpysl3 PE=1 SV=1          | 1.010 | 1.022 | 1.016 | 1.335 | 1.161 | 1.451 |
| U1 small nuclear ribonucleoprotein A OS=Mus musculus GN=Snrpa PE=1 SV=3            | 0.933 | 0.898 | 0.915 | 0.880 | 0.668 | 0.925 |
| U1 small nuclear ribonucleoprotein C OS=Mus musculus GN=Snrpc PE=1 SV=1            | 1.000 | 0.901 | 0.951 | 1.008 | 0.808 | 1.352 |
| Spectrin beta chain, non-erythrocytic 1 OS=Mus musculus GN=Sptbn1 PE=1 SV=2        | 0.954 | 1.013 | 0.983 | 0.788 | 0.811 | 0.764 |
| Transcription intermediary factor 1-beta OS=Mus musculus GN=Trim28 PE=1 SV=3       | 1.003 | 1.004 | 1.003 | 1.028 | 1.087 | 1.010 |
| Transferrin receptor protein 1 OS=Mus musculus GN=Tfrc PE=1 SV=1                   | 1.000 | 0.849 | 0.924 | 0.472 | 0.540 | 0.974 |
| Follistatin-related protein 1 OS=Mus musculus GN=Fstl1 PE=1 SV=2                   | 0.973 | 1.033 | 1.003 | 0.509 | 0.572 | 0.527 |
| Transcription elongation factor SPT6 OS=Mus musculus GN=Supt6h PE=1 SV=2           | 1.000 | 0.815 | 0.908 | 0.643 | 0.784 | 0.687 |
| Zinc finger protein ZPR1 OS=Mus musculus GN=Zpr1 PE=1 SV=1                         | 1.000 | 0.911 | 0.955 | 1.349 | 1.546 | 1.013 |
| Tumor protein D52 OS=Mus musculus GN=Tpd52 PE=1 SV=2                               | 1.002 | 1.007 | 1.004 | 1.093 | 1.101 | 1.056 |
| Sorbin and SH3 domain-containing protein 1 OS=Mus musculus GN=Sorbs1 PE=1 SV=2     | 1.000 | 0.781 | 0.890 | 0.564 | 0.603 | 0.515 |
| Drebrin-like protein OS=Mus musculus GN=Dbnl PE=1 SV=2                             | 1.040 | 0.979 | 1.010 | 1.320 | 1.208 | 1.080 |
| Endophilin-A2 OS=Mus musculus GN=Sh3gl1 PE=1 SV=1                                  | 1.000 | 0.869 | 0.935 | 0.706 | 0.603 | 0.592 |
| Osteoclast-stimulating factor 1 OS=Mus musculus GN=Ostf1 PE=1 SV=2                 | 1.000 | 1.043 | 1.021 | 1.091 | 0.738 | 1.136 |
| Cystatin-B OS=Mus musculus GN=Cstb PE=1 SV=1                                       | 0.998 | 1.028 | 1.013 | 1.520 | 1.685 | 1.401 |
| Protein NDRG1 OS=Mus musculus GN=Ndr1 PE=1 SV=1                                    | 0.929 | 0.936 | 0.932 | 1.179 | 0.909 | 1.124 |
| Peptidyl-prolyl cis-trans isomerase FKBP3 OS=Mus musculus GN=Fkbp3 PE=1 SV=2       | 1.120 | 1.081 | 1.100 | 1.332 | 1.625 | 1.180 |
| Synaptic vesicle membrane protein VAT-1 homolog OS=Mus musculus GN=Vat1 PE=1 SV=3  | 1.029 | 1.067 | 1.048 | 1.085 | 1.074 | 1.219 |
| Zyxin OS=Mus musculus GN=Zyx PE=1 SV=2                                             | 1.095 | 1.242 | 1.169 | 1.588 | 1.384 | 1.588 |
| Calcineurin subunit B type 1 OS=Mus musculus GN=Ppp3r1 PE=1 SV=3                   | 0.928 | 0.872 | 0.900 | 0.931 | 0.877 | 1.137 |
| Mitogen-activated protein kinase 3 OS=Mus musculus GN=Mapk3 PE=1 SV=5              | 1.000 | 0.928 | 0.964 | 1.042 | 1.358 | 1.247 |



|                                                                                         |       |       |       |       |       |       |
|-----------------------------------------------------------------------------------------|-------|-------|-------|-------|-------|-------|
| Serum deprivation-response protein OS=Mus musculus GN=Sdpr PE=1 SV=3                    | 1.000 | 0.807 | 0.904 | 0.591 | 0.686 | 1.054 |
| Adapter molecule crk OS=Mus musculus GN=Crk PE=1 SV=1                                   | 1.030 | 0.965 | 0.997 | 0.898 | 0.977 | 1.104 |
| RNA-binding protein Raly OS=Mus musculus GN=Raly PE=1 SV=3                              | 1.000 | 1.841 | 1.420 | 1.616 | 2.209 | 1.295 |
| Adipocyte enhancer-binding protein 1 OS=Mus musculus GN=Aebp1 PE=1 SV=1                 | 0.965 | 0.987 | 0.976 | 1.500 | 1.424 | 1.382 |
| Sepiapterin reductase OS=Mus musculus GN=Spr PE=1 SV=1                                  | 0.940 | 0.917 | 0.928 | 1.226 | 1.075 | 1.320 |
| Transcription factor BTF3 OS=Mus musculus GN=Btf3 PE=1 SV=3                             | 1.000 | 1.008 | 1.004 | 0.814 | 0.814 | 0.931 |
| N(4)-(beta-N-acetylglucosaminy)-L-asparaginase OS=Mus musculus GN=Aga PE=1 SV=1         | 1.030 | 1.164 | 1.097 | 0.948 | 0.903 | 0.817 |
| Splicing factor 1 OS=Mus musculus GN=Sf1 PE=1 SV=6                                      | 1.129 | 1.117 | 1.123 | 1.412 | 1.427 | 1.344 |
| Sequestosome-1 OS=Mus musculus GN=Sqstm1 PE=1 SV=1                                      | 1.000 | 1.034 | 1.017 | 0.901 | 1.029 | 1.156 |
| Ubiquitin-like protein ISG15 OS=Mus musculus GN=Isig15 PE=1 SV=4                        | 1.032 | 0.958 | 0.995 | 1.188 | 0.957 | 1.017 |
| 10 kDa heat shock protein, mitochondrial OS=Mus musculus GN=Hspe1 PE=1 SV=2             | 1.127 | 1.136 | 1.131 | 0.695 | 1.232 | 0.750 |
| Sorbitol dehydrogenase OS=Mus musculus GN=Sord PE=1 SV=3                                | 0.920 | 0.732 | 0.826 | 0.704 | 0.691 | 0.644 |
| Carbonic anhydrase 4 OS=Mus musculus GN=Ca4 PE=1 SV=1                                   | 1.000 | 0.908 | 0.954 | 0.897 | 0.351 | 1.205 |
| C-type mannose receptor 2 OS=Mus musculus GN=Mrc2 PE=1 SV=3                             | 0.997 | 0.988 | 0.992 | 0.702 | 0.520 | 0.483 |
| DNA topoisomerase 2-beta OS=Mus musculus GN=Top2b PE=1 SV=2                             | 1.000 | 0.812 | 0.906 | 1.343 | 1.329 | 1.038 |
| Tripeptidyl-peptidase 2 OS=Mus musculus GN=Thpp2 PE=1 SV=3                              | 1.048 | 1.044 | 1.046 | 1.322 | 1.185 | 1.188 |
| NAD(P)H dehydrogenase [quinone] 1 OS=Mus musculus GN=Nqo1 PE=1 SV=3                     | 1.000 | 0.926 | 0.963 | 1.213 | 1.448 | 1.344 |
| Spermidine synthase OS=Mus musculus GN=Srm PE=1 SV=1                                    | 1.000 | 0.923 | 0.961 | 1.317 | 1.248 | 1.072 |
| Endothelial protein C receptor OS=Mus musculus GN=Procr PE=1 SV=3                       | 1.000 | 1.004 | 1.002 | 0.718 | 0.620 | 0.973 |
| Vinculin OS=Mus musculus GN=Vcl PE=1 SV=4                                               | 1.083 | 1.182 | 1.132 | 1.448 | 1.415 | 1.403 |
| Trifunctional purine biosynthetic protein adenosine-3 OS=Mus musculus GN=Gart PE=1 SV=3 | 1.000 | 1.018 | 1.009 | 1.380 | 1.457 | 1.392 |
| Clathrin heavy chain 1 OS=Mus musculus GN=Cltc PE=1 SV=3                                | 0.985 | 1.039 | 1.012 | 0.917 | 1.102 | 0.914 |
| Methionine--tRNA ligase, cytoplasmic OS=Mus musculus GN=Mars PE=1 SV=1                  | 1.000 | 1.080 | 1.040 | 1.569 | 1.152 | 1.237 |
| Dynein heavy chain 17, axonemal OS=Mus musculus GN=Dnah17 PE=1 SV=2                     | 1.000 | 0.695 | 0.847 | 1.094 | 0.590 | 0.765 |
| Myoferlin OS=Mus musculus GN=Myof PE=1 SV=2                                             | 0.908 | 0.875 | 0.891 | 1.277 | 1.239 | 1.356 |
| Sister chromatid cohesion protein PDS5 homolog A OS=Mus musculus GN=Pds5a PE=1 SV=3     | 1.000 | 0.719 | 0.860 | 0.654 | 0.888 | 0.447 |
| Switch-associated protein 70 OS=Mus musculus GN=Swap70 PE=1 SV=2                        | 1.000 | 0.899 | 0.950 | 0.898 | 0.815 | 0.743 |
| Cell division cycle 5-like protein OS=Mus musculus GN=Cdc5l PE=1 SV=2                   | 1.000 | 0.986 | 0.993 | 0.884 | 0.929 | 0.911 |
| Cingulin-like protein 1 OS=Mus musculus GN=Cgln1 PE=1 SV=2                              | 1.000 | 0.723 | 0.861 | 0.394 | 0.889 | 0.680 |
| Nucleolar protein 58 OS=Mus musculus GN=Nop58 PE=1 SV=1                                 | 1.000 | 1.012 | 1.006 | 0.355 | 0.563 | 0.695 |
| Alpha-2-macroglobulin-P OS=Mus musculus GN=A2mp PE=2 SV=2                               | 0.993 | 1.030 | 1.012 | 1.183 | 1.087 | 1.344 |

|                                                                                                                              |       |       |       |       |       |       |
|------------------------------------------------------------------------------------------------------------------------------|-------|-------|-------|-------|-------|-------|
| Keratin, type I cytoskeletal 42 OS=Mus musculus<br>GN=Krt42 PE=1 SV=1                                                        | 0.911 | 0.839 | 0.875 | 0.413 | 0.540 | 0.369 |
| Tropomyosin alpha-4 chain OS=Mus musculus<br>GN=Tpm4 PE=1 SV=3                                                               | 1.007 | 1.045 | 1.026 | 1.260 | 1.345 | 1.173 |
| Undifferentiated embryonic cell transcription<br>factor 1 OS=Mus musculus GN=Utf1 PE=1 SV=2                                  | 1.000 | 0.818 | 0.909 | 1.656 | 0.777 | 0.980 |
| Cleavage and polyadenylation specificity factor<br>subunit 6 OS=Mus musculus GN=Cpsf6 PE=1 SV=1                              | 1.000 | 0.776 | 0.888 | 1.059 | 0.805 | 0.851 |
| Keratin, type II cytoskeletal 73 OS=Mus musculus<br>GN=Krt73 PE=1 SV=1                                                       | 0.976 | 0.787 | 0.882 | 0.292 | 0.378 | 0.243 |
| DnaJ homolog subfamily C member 8 OS=Mus<br>musculus GN=Dnajc8 PE=1 SV=2                                                     | 1.000 | 1.092 | 1.046 | 1.653 | 1.195 | 1.049 |
| Eukaryotic translation initiation factor 4 gamma 1<br>OS=Mus musculus GN=Eif4g1 PE=1 SV=1                                    | 1.115 | 1.015 | 1.065 | 1.194 | 1.143 | 1.256 |
| RNA-binding protein 26 OS=Mus musculus<br>GN=Rbm26 PE=1 SV=2                                                                 | 1.000 | 0.870 | 0.935 | 0.889 | 0.945 | 1.220 |
| Xaa-Pro aminopeptidase 1 OS=Mus musculus<br>GN=Xpnpep1 PE=1 SV=1                                                             | 1.099 | 1.231 | 1.165 | 1.246 | 1.415 | 1.382 |
| Serine/threonine-protein phosphatase 2A 55 kDa<br>regulatory subunit B alpha isoform OS=Mus<br>musculus GN=Ppp2r2a PE=1 SV=1 | 1.000 | 1.117 | 1.059 | 1.378 | 1.176 | 1.321 |
| Serine/threonine-protein phosphatase 4<br>regulatory subunit 3A OS=Mus musculus<br>GN=Ppp4r3a PE=1 SV=1                      | 1.000 | 0.631 | 0.815 | 0.322 | 0.246 | 0.664 |
| U5 small nuclear ribonucleoprotein 200 kDa<br>helicase OS=Mus musculus GN=Snrnp200 PE=1<br>SV=1                              | 1.000 | 1.010 | 1.005 | 1.065 | 0.892 | 1.106 |
| ATP-binding cassette sub-family F member 1<br>OS=Mus musculus GN=Abcf1 PE=1 SV=1                                             | 1.000 | 0.976 | 0.988 | 0.975 | 0.631 | 1.438 |
| Phosphatidylinositol 3,4,5-trisphosphate 5-<br>phosphatase 2 OS=Mus musculus GN=Inpp11 PE=1<br>SV=1                          | 1.000 | 0.897 | 0.948 | 0.644 | 0.764 | 1.296 |
| UDP-glucose:glycoprotein glucosyltransferase 1<br>OS=Mus musculus GN=Uggt1 PE=1 SV=4                                         | 1.004 | 0.902 | 0.953 | 0.943 | 0.579 | 0.690 |
| Exportin-1 OS=Mus musculus GN=Xpo1 PE=1 SV=1                                                                                 | 1.059 | 0.962 | 1.010 | 1.154 | 1.264 | 1.127 |
| Nestin OS=Mus musculus GN=Nes PE=1 SV=1                                                                                      | 1.000 | 1.029 | 1.015 | 0.769 | 0.768 | 0.947 |
| PEST proteolytic signal-containing nuclear protein<br>OS=Mus musculus GN=Pcnp PE=1 SV=1                                      | 1.000 | 0.906 | 0.953 | 1.397 | 1.644 | 1.450 |
| Sorting nexin-6 OS=Mus musculus GN=Snx6 PE=1<br>SV=2                                                                         | 1.000 | 0.831 | 0.915 | 1.030 | 0.928 | 1.157 |
| Kinesin-like protein KIF11 OS=Mus musculus<br>GN=Kif11 PE=1 SV=1                                                             | 1.000 | 0.948 | 0.974 | 0.864 | 0.976 | 0.887 |
| FK506-binding protein 15 OS=Mus musculus<br>GN=Fkbp15 PE=1 SV=2                                                              | 1.000 | 0.921 | 0.961 | 0.687 | 0.480 | 0.624 |
| Serine/threonine-protein kinase OSR1 OS=Mus<br>musculus GN=Oxsr1 PE=1 SV=1                                                   | 1.000 | 0.991 | 0.996 | 0.785 | 1.013 | 1.016 |
| AT-hook DNA-binding motif-containing protein 1<br>OS=Mus musculus GN=Ahd1 PE=1 SV=1                                          | 1.000 | 0.897 | 0.948 | 1.353 | 0.902 | 0.819 |
| Tyrosine-protein phosphatase non-receptor type<br>23 OS=Mus musculus GN=Ptpn23 PE=1 SV=2                                     | 1.000 | 0.939 | 0.969 | 0.765 | 0.770 | 1.192 |
| Leucine-rich PPR motif-containing protein,<br>mitochondrial OS=Mus musculus GN=Lrpprc PE=1<br>SV=2                           | 1.000 | 0.838 | 0.919 | 0.706 | 0.598 | 0.726 |
| Polypeptide N-acetylgalactosaminyltransferase 2<br>OS=Mus musculus GN=Galnt2 PE=1 SV=1                                       | 1.000 | 0.742 | 0.871 | 0.476 | 0.440 | 0.501 |
| SWI/SNF complex subunit SMARCC2 OS=Mus<br>musculus GN=Smrcc2 PE=1 SV=2                                                       | 1.000 | 0.940 | 0.970 | 0.859 | 1.072 | 1.036 |
| Histone-lysine N-methyltransferase 2D OS=Mus<br>musculus GN=Kmt2d PE=1 SV=2                                                  | 1.000 | 1.457 | 1.228 | 2.049 | 1.796 | 1.064 |
| Serine/arginine-rich splicing factor 1 OS=Mus<br>musculus GN=Srsf1 PE=1 SV=3                                                 | 0.985 | 0.974 | 0.979 | 1.082 | 1.129 | 1.036 |

|                                                                                                                        |       |        |        |        |        |        |
|------------------------------------------------------------------------------------------------------------------------|-------|--------|--------|--------|--------|--------|
| Platelet-derived growth factor receptor-like protein OS=Mus musculus GN=Pdgfr1 PE=2 SV=1                               | 1.095 | 0.979  | 1.037  | 1.332  | 1.269  | 1.278  |
| UPF0704 protein C6orf165 homolog OS=Mus musculus PE=2 SV=2                                                             | 1.000 | 0.721  | 0.861  | 0.219  | 0.282  | 0.201  |
| Tankyrase-1 OS=Mus musculus GN=Tnks PE=1 SV=1                                                                          | 1.000 | 1.030  | 1.015  | 1.254  | 1.638  | 1.360  |
| N-alpha-acetyltransferase 50 OS=Mus musculus GN=Naa50 PE=1 SV=1                                                        | 1.000 | 1.042  | 1.021  | 1.490  | 1.388  | 1.028  |
| Hematological and neurological expressed 1-like protein OS=Mus musculus GN=Hn1l PE=1 SV=1                              | 1.000 | 1.188  | 1.094  | 1.952  | 2.715  | 2.763  |
| WASH complex subunit FAM21 OS=Mus musculus GN=Fam21 PE=1 SV=1                                                          | 1.000 | 0.847  | 0.924  | 1.115  | 0.823  | 1.295  |
| NudC domain-containing protein 1 OS=Mus musculus GN=Nudcd1 PE=1 SV=2                                                   | 1.000 | 1.001  | 1.001  | 1.288  | 1.082  | 1.597  |
| Guanine nucleotide-binding protein G(s) subunit alpha isoforms XLas OS=Mus musculus GN=Gnas PE=1 SV=1                  | 1.000 | 0.900  | 0.950  | 0.778  | 0.827  | 0.700  |
| N-acetylglucosamine-1-phosphotransferase subunit gamma OS=Mus musculus GN=Gnptg PE=1 SV=1                              | 1.000 | 0.971  | 0.985  | 0.826  | 0.540  | 0.910  |
| Protein Daple OS=Mus musculus GN=Ccdc88c PE=1 SV=1                                                                     | 0.019 | 26.351 | 13.185 | 28.499 | 25.090 | 51.909 |
| Centrosomal protein of 162 kDa OS=Mus musculus GN=Cep162 PE=1 SV=2                                                     | 0.970 | 0.961  | 0.965  | 1.378  | 0.921  | 1.538  |
| Cullin-associated NEDD8-dissociated protein 1 OS=Mus musculus GN=Cand1 PE=1 SV=2                                       | 1.129 | 1.050  | 1.089  | 1.346  | 1.473  | 1.303  |
| U6 snRNA-associated Sm-like protein LSm8 OS=Mus musculus GN=Lsm8 PE=1 SV=3                                             | 1.071 | 0.901  | 0.986  | 1.021  | 1.347  | 1.304  |
| 40S ribosomal protein S27 OS=Mus musculus GN=Rps27 PE=1 SV=3                                                           | 1.000 | 0.876  | 0.938  | 1.539  | 1.255  | 1.345  |
| 60S ribosomal protein L10 OS=Mus musculus GN=Rpl10 PE=1 SV=3                                                           | 1.000 | 1.760  | 1.380  | 0.963  | 1.685  | 1.861  |
| Eukaryotic translation initiation factor 2 subunit 1 OS=Mus musculus GN=Eif2s1 PE=1 SV=3                               | 1.023 | 1.021  | 1.022  | 1.311  | 1.490  | 1.403  |
| Ubiquitin-conjugating enzyme E2 R2 OS=Mus musculus GN=Ube2r2 PE=1 SV=1                                                 | 1.000 | 1.271  | 1.136  | 4.924  | 4.393  | 6.968  |
| Serine/threonine-protein phosphatase 2A 65 kDa regulatory subunit A alpha isoform OS=Mus musculus GN=Ppp2r1a PE=1 SV=3 | 0.859 | 0.908  | 0.884  | 1.436  | 1.605  | 1.283  |
| Multivesicular body subunit 12A OS=Mus musculus GN=Mvb12a PE=1 SV=1                                                    | 1.000 | 1.343  | 1.172  | 1.302  | 1.162  | 1.114  |
| Ubiquitin domain-containing protein UBFD1 OS=Mus musculus GN=Ubfd1 PE=1 SV=2                                           | 1.000 | 0.984  | 0.992  | 1.238  | 1.474  | 1.656  |
| Staphylococcal nuclease domain-containing protein 1 OS=Mus musculus GN=Snd1 PE=1 SV=1                                  | 1.016 | 0.961  | 0.989  | 1.066  | 1.124  | 1.132  |
| Nucleosome assembly protein 1-like 4 OS=Mus musculus GN=Nap1l4 PE=1 SV=1                                               | 0.962 | 0.935  | 0.949  | 1.537  | 1.722  | 1.272  |
| Phosphatidylinositol-binding clathrin assembly protein OS=Mus musculus GN=Picalm PE=1 SV=1                             | 1.000 | 0.868  | 0.934  | 0.699  | 0.582  | 0.767  |
| Heterogeneous nuclear ribonucleoprotein Q OS=Mus musculus GN=Syncrip PE=1 SV=2                                         | 1.084 | 1.013  | 1.049  | 1.270  | 1.368  | 1.270  |
| Tubulin beta-2A chain OS=Mus musculus GN=Tubb2a PE=1 SV=1                                                              | 1.000 | 1.101  | 1.051  | 0.701  | 0.774  | 0.832  |
| Lysosomal Pro-X carboxypeptidase OS=Mus musculus GN=Prp1 PE=1 SV=2                                                     | 1.045 | 1.280  | 1.162  | 1.971  | 1.277  | 1.991  |
| E3 ubiquitin-protein ligase HUWE1 OS=Mus musculus GN=Huwe1 PE=1 SV=5                                                   | 1.000 | 1.017  | 1.009  | 0.743  | 0.710  | 1.011  |
| Putative RNA-binding protein Luc7-like 2 OS=Mus musculus GN=Luc7l2 PE=1 SV=1                                           | 1.000 | 0.846  | 0.923  | 0.573  | 0.559  | 0.556  |
| Protein DEK OS=Mus musculus GN=Dek PE=1 SV=1                                                                           | 1.000 | 0.878  | 0.939  | 1.542  | 1.204  | 1.335  |

|                                                                                                               |       |       |       |       |       |       |
|---------------------------------------------------------------------------------------------------------------|-------|-------|-------|-------|-------|-------|
| Integrator complex subunit 3 OS=Mus musculus<br>GN=Ints3 PE=1 SV=2                                            | 1.000 | 0.843 | 0.921 | 1.095 | 0.831 | 0.791 |
| Protein PRRC2B OS=Mus musculus GN=Prrc2b<br>PE=1 SV=1                                                         | 1.000 | 0.866 | 0.933 | 0.701 | 1.339 | 1.650 |
| Alpha-actinin-1 OS=Mus musculus GN=Actn1 PE=1<br>SV=1                                                         | 1.054 | 1.174 | 1.114 | 1.466 | 1.644 | 1.428 |
| Ubiquitin thioesterase OTUB1 OS=Mus musculus<br>GN=Otub1 PE=1 SV=2                                            | 0.997 | 0.923 | 0.960 | 1.168 | 1.493 | 1.343 |
| Leucine-rich repeat-containing protein 75A<br>OS=Mus musculus GN=Lrrc75a PE=1 SV=1                            | 1.000 | 1.014 | 1.007 | 0.726 | 0.831 | 0.605 |
| ADAMTS-like protein 2 OS=Mus musculus<br>GN=Adamtsl2 PE=2 SV=1                                                | 1.000 | 1.096 | 1.048 | 0.970 | 0.604 | 1.053 |
| Phosphoglucosyltransferase-2 OS=Mus musculus<br>GN=Pgm2 PE=1 SV=1                                             | 1.000 | 1.721 | 1.361 | 1.125 | 1.074 | 1.162 |
| Interferon-induced very large GTPase 1 OS=Mus<br>musculus GN=Gvin1 PE=1 SV=1                                  | 1.000 | 0.981 | 0.991 | 0.576 | 0.485 | 0.812 |
| Protein LAP2 OS=Mus musculus GN=Erbp2ip PE=1<br>SV=3                                                          | 1.000 | 0.784 | 0.892 | 0.830 | 0.574 | 0.682 |
| Histone lysine demethylase PHF8 OS=Mus<br>musculus GN=Phf8 PE=1 SV=2                                          | 1.000 | 1.160 | 1.080 | 1.378 | 1.263 | 2.423 |
| Nischarin OS=Mus musculus GN=Nisch PE=1 SV=2                                                                  | 1.000 | 0.947 | 0.973 | 1.471 | 1.124 | 1.213 |
| Vacuolar protein sorting-associated protein 13B<br>OS=Mus musculus GN=Vps13b PE=1 SV=2                        | 1.000 | 0.791 | 0.896 | 1.784 | 0.745 | 1.068 |
| Septin-9 OS=Mus musculus GN=Sept9 PE=1 SV=1                                                                   | 1.000 | 0.806 | 0.903 | 0.644 | 0.774 | 1.338 |
| N-alpha-acetyltransferase 15, Naa15 auxiliary<br>subunit OS=Mus musculus GN=Naa15 PE=1 SV=1                   | 1.000 | 0.851 | 0.926 | 1.246 | 1.097 | 1.792 |
| DNA-directed RNA polymerases I, II, and III<br>subunit RPABC1 OS=Mus musculus GN=Polr2e<br>PE=1 SV=1          | 1.000 | 0.816 | 0.908 | 0.798 | 1.236 | 1.141 |
| Steroid receptor RNA activator 1 OS=Mus<br>musculus GN=Sra1 PE=1 SV=3                                         | 1.000 | 1.128 | 1.064 | 1.511 | 1.072 | 1.309 |
| 2'-deoxynucleoside 5'-phosphate N-hydrolase 1<br>OS=Mus musculus GN=Dnph1 PE=1 SV=2                           | 1.000 | 2.097 | 1.549 | 2.762 | 1.210 | 1.748 |
| Transmembrane protein 202 OS=Mus musculus<br>GN=Tmem202 PE=2 SV=1                                             | 1.000 | 1.127 | 1.064 | 0.978 | 0.878 | 1.479 |
| Protein LYRIC OS=Mus musculus GN=Mtdh PE=1<br>SV=1                                                            | 1.000 | 0.882 | 0.941 | 1.023 | 0.920 | 0.893 |
| Collagen alpha-1(XIV) chain OS=Mus musculus<br>GN=Col14a1 PE=1 SV=2                                           | 1.000 | 0.839 | 0.920 | 0.269 | 0.172 | 0.319 |
| Serine/threonine-protein kinase VRK1 OS=Mus<br>musculus GN=Vrk1 PE=1 SV=2                                     | 1.000 | 1.144 | 1.072 | 0.816 | 0.964 | 0.741 |
| Ubiquitin-associated protein 2-like OS=Mus<br>musculus GN=Ubp2l PE=1 SV=1                                     | 1.006 | 0.956 | 0.981 | 1.326 | 1.537 | 1.354 |
| Filamin-B OS=Mus musculus GN=Flnb PE=1 SV=3                                                                   | 0.963 | 1.052 | 1.007 | 1.348 | 1.402 | 1.373 |
| Nuclear ubiquitinous casein and cyclin-dependent<br>kinase substrate 1 OS=Mus musculus GN=Nucks1<br>PE=1 SV=1 | 1.000 | 1.098 | 1.049 | 1.589 | 1.436 | 1.466 |
| Zinc phosphodiesterase ELAC protein 2 OS=Mus<br>musculus GN=Elac2 PE=1 SV=1                                   | 1.000 | 0.907 | 0.953 | 1.077 | 0.949 | 0.793 |
| Tenascin OS=Mus musculus GN=Tnc PE=1 SV=1                                                                     | 1.000 | 1.059 | 1.029 | 0.974 | 1.220 | 0.959 |
| E3 ubiquitin-protein ligase LRSAM1 OS=Mus<br>musculus GN=Lrsam1 PE=1 SV=1                                     | 1.000 | 1.052 | 1.026 | 0.710 | 0.613 | 1.272 |
| Protein Simiate OS=Mus musculus GN=Fam206a<br>PE=1 SV=2                                                       | 1.000 | 1.306 | 1.153 | 1.659 | 1.342 | 1.364 |
| ATP-dependent RNA helicase DDX42 OS=Mus<br>musculus GN=Ddx42 PE=1 SV=3                                        | 1.000 | 0.913 | 0.956 | 0.671 | 0.817 | 0.987 |
| Glutamate-rich WD repeat-containing protein 1<br>OS=Mus musculus GN=Grwd1 PE=1 SV=2                           | 1.000 | 0.858 | 0.929 | 0.575 | 0.778 | 0.893 |
| Neuronal cell adhesion molecule OS=Mus<br>musculus GN=Nrcam PE=1 SV=2                                         | 1.000 | 0.876 | 0.938 | 0.625 | 0.988 | 0.602 |
| Cysteine protease ATG4C OS=Mus musculus                                                                       | 1.000 | 1.081 | 1.041 | 1.529 | 1.055 | 1.383 |

|                                                                                                          |       |       |       |       |       |       |
|----------------------------------------------------------------------------------------------------------|-------|-------|-------|-------|-------|-------|
| GN=Atg4c PE=1 SV=2                                                                                       |       |       |       |       |       |       |
| Disks large homolog 1 OS=Mus musculus GN=Dlg1 PE=1 SV=1                                                  | 1.000 | 1.142 | 1.071 | 1.068 | 1.246 | 1.592 |
| WD repeat-containing protein 82 OS=Mus musculus GN=Wdr82 PE=1 SV=1                                       | 1.030 | 0.872 | 0.951 | 1.327 | 1.556 | 1.124 |
| N-acetylglucosamine-6-sulfatase OS=Mus musculus GN=Gns PE=1 SV=1                                         | 0.960 | 0.943 | 0.951 | 0.552 | 0.468 | 0.585 |
| Elongation factor Tu, mitochondrial OS=Mus musculus GN=Tufm PE=1 SV=1                                    | 1.000 | 0.822 | 0.911 | 0.245 | 0.226 | 0.381 |
| Lipoma-preferred partner homolog OS=Mus musculus GN=Lpp PE=1 SV=1                                        | 1.000 | 1.103 | 1.051 | 1.236 | 1.313 | 1.269 |
| Transportin-1 OS=Mus musculus GN=Tnp01 PE=1 SV=2                                                         | 0.994 | 0.921 | 0.957 | 1.067 | 1.087 | 0.990 |
| Beta-actin-like protein 2 OS=Mus musculus GN=Actb12 PE=1 SV=1                                            | 1.000 | 1.093 | 1.046 | 1.196 | 1.206 | 1.861 |
| Heterogeneous nuclear ribonucleoprotein A3 OS=Mus musculus GN=Hnnpa3 PE=1 SV=1                           | 1.079 | 1.130 | 1.104 | 1.754 | 2.104 | 1.534 |
| Calcium-activated chloride channel regulator 2 OS=Mus musculus GN=Cla2 PE=2 SV=1                         | 1.000 | 0.917 | 0.958 | 0.785 | 0.595 | 1.217 |
| 26S proteasome non-ATPase regulatory subunit 11 OS=Mus musculus GN=Psm11 PE=1 SV=3                       | 1.038 | 0.991 | 1.015 | 1.035 | 1.216 | 1.097 |
| Eukaryotic translation initiation factor 4B OS=Mus musculus GN=Eif4b PE=1 SV=1                           | 0.895 | 1.142 | 1.019 | 1.627 | 1.729 | 1.623 |
| WD repeat-containing protein 92 OS=Mus musculus GN=Wdr92 PE=1 SV=1                                       | 1.000 | 0.786 | 0.893 | 1.014 | 0.614 | 0.866 |
| Alanine--tRNA ligase, cytoplasmic OS=Mus musculus GN=Aars PE=1 SV=1                                      | 1.037 | 1.054 | 1.045 | 1.870 | 1.663 | 1.793 |
| Alpha-ketoglutarate-dependent dioxygenase FTO OS=Mus musculus GN=Fto PE=1 SV=1                           | 1.000 | 0.838 | 0.919 | 0.537 | 0.738 | 0.931 |
| Keratin, type II cytoskeletal 75 OS=Mus musculus GN=Krt75 PE=1 SV=1                                      | 1.000 | 0.880 | 0.940 | 0.409 | 0.685 | 0.634 |
| TIP41-like protein OS=Mus musculus GN=Tipr1 PE=1 SV=1                                                    | 1.000 | 1.073 | 1.037 | 0.633 | 0.963 | 0.700 |
| Selenide, water dikinase 1 OS=Mus musculus GN=Seph1 PE=1 SV=1                                            | 0.791 | 1.119 | 0.955 | 1.637 | 1.627 | 1.489 |
| Reticulocalbin-3 OS=Mus musculus GN=Rcn3 PE=1 SV=1                                                       | 1.015 | 0.971 | 0.993 | 0.891 | 0.996 | 1.032 |
| Probable D-tyrosyl-tRNA(Tyr) deacylase 2 OS=Mus musculus GN=Dtd2 PE=1 SV=1                               | 1.000 | 1.066 | 1.033 | 0.874 | 0.481 | 0.743 |
| Nardilysin OS=Mus musculus GN=Nrd1 PE=1 SV=1                                                             | 1.000 | 0.824 | 0.912 | 1.309 | 1.200 | 1.116 |
| Engulfment and cell motility protein 2 OS=Mus musculus GN=Elmo2 PE=1 SV=1                                | 1.000 | 1.128 | 1.064 | 1.022 | 0.820 | 1.182 |
| Neutral alpha-glucosidase AB OS=Mus musculus GN=Ganab PE=1 SV=1                                          | 1.000 | 0.900 | 0.950 | 0.805 | 0.919 | 0.826 |
| Cleavage stimulation factor subunit 2 OS=Mus musculus GN=Cstf2 PE=1 SV=2                                 | 1.000 | 0.881 | 0.940 | 1.030 | 0.992 | 0.929 |
| Nuclear pore complex protein Nup93 OS=Mus musculus GN=Nup93 PE=1 SV=1                                    | 0.971 | 1.014 | 0.993 | 0.746 | 1.071 | 0.998 |
| Small glutamine-rich tetratricopeptide repeat-containing protein alpha OS=Mus musculus GN=Sgta PE=1 SV=2 | 1.000 | 0.918 | 0.959 | 1.094 | 1.016 | 1.178 |
| Eukaryotic translation initiation factor 2A OS=Mus musculus GN=Eif2a PE=1 SV=2                           | 0.969 | 0.996 | 0.982 | 1.185 | 1.132 | 1.291 |
| 26S proteasome non-ATPase regulatory subunit 5 OS=Mus musculus GN=Psm5 PE=1 SV=4                         | 0.942 | 0.992 | 0.967 | 1.264 | 1.244 | 1.361 |
| Olfactomedin-like protein 3 OS=Mus musculus GN=Olfl3 PE=2 SV=2                                           | 1.058 | 0.986 | 1.022 | 0.808 | 0.804 | 0.832 |
| Activator of 90 kDa heat shock protein ATPase homolog 1 OS=Mus musculus GN=Ahsa1 PE=1 SV=2               | 1.130 | 1.238 | 1.184 | 1.712 | 1.765 | 2.021 |
| Protein RCC2 OS=Mus musculus GN=Rcc2 PE=1                                                                | 1.032 | 1.048 | 1.040 | 0.937 | 1.107 | 1.040 |

|                                                                                                       |       |       |       |       |       |       |
|-------------------------------------------------------------------------------------------------------|-------|-------|-------|-------|-------|-------|
| <b>SV=1</b>                                                                                           |       |       |       |       |       |       |
| <b>Importin-5 OS=Mus musculus GN=Ipo5 PE=1 SV=3</b>                                                   | 0.959 | 0.930 | 0.945 | 1.483 | 1.900 | 1.457 |
| <b>Inactive tyrosine-protein kinase 7 OS=Mus musculus GN=Ptk7 PE=1 SV=1</b>                           | 1.000 | 1.090 | 1.045 | 0.999 | 0.961 | 1.186 |
| <b>Serine/threonine-protein kinase SMG1 OS=Mus musculus GN=Smg1 PE=1 SV=3</b>                         | 1.000 | 1.012 | 1.006 | 0.870 | 0.837 | 0.815 |
| <b>Early endosome antigen 1 OS=Mus musculus GN=Eea1 PE=1 SV=2</b>                                     | 0.971 | 0.968 | 0.969 | 1.039 | 1.113 | 1.276 |
| <b>Serine/arginine-rich splicing factor 7 OS=Mus musculus GN=Srsf7 PE=1 SV=1</b>                      | 1.000 | 0.824 | 0.912 | 0.532 | 0.597 | 0.525 |
| <b>Sodium/hydrogen exchanger 7 OS=Mus musculus GN=Slc9a7 PE=1 SV=1</b>                                | 1.000 | 1.174 | 1.087 | 1.734 | 0.864 | 0.977 |
| <b>Heat shock 70 kDa protein 13 OS=Mus musculus GN=Hspa13 PE=1 SV=1</b>                               | 1.004 | 1.099 | 1.051 | 0.960 | 0.851 | 0.974 |
| <b>Leucine--tRNA ligase, cytoplasmic OS=Mus musculus GN=Lars PE=1 SV=2</b>                            | 0.979 | 1.027 | 1.003 | 1.090 | 0.943 | 1.164 |
| <b>Eukaryotic translation initiation factor 1A, X-chromosomal OS=Mus musculus GN=Eif1ax PE=2 SV=3</b> | 1.014 | 0.953 | 0.984 | 1.268 | 1.740 | 1.344 |
| <b>Cytoskeleton-associated protein 4 OS=Mus musculus GN=Ckap4 PE=1 SV=2</b>                           | 1.055 | 1.079 | 1.067 | 0.701 | 0.576 | 0.670 |
| <b>Spondin-2 OS=Mus musculus GN=Spon2 PE=2 SV=2</b>                                                   | 1.034 | 1.261 | 1.148 | 0.335 | 0.289 | 0.336 |
| <b>Sulfhydryl oxidase 1 OS=Mus musculus GN=Qsox1 PE=1 SV=1</b>                                        | 0.978 | 1.015 | 0.996 | 1.034 | 0.918 | 1.075 |
| <b>Asparagine--tRNA ligase, cytoplasmic OS=Mus musculus GN=Nars PE=1 SV=2</b>                         | 1.000 | 0.993 | 0.996 | 1.548 | 1.418 | 1.312 |
| <b>Methionine aminopeptidase 1 OS=Mus musculus GN=Metap1 PE=1 SV=1</b>                                | 1.000 | 0.674 | 0.837 | 0.300 | 0.388 | 0.319 |
| <b>Reticulocalbin-2 OS=Mus musculus GN=Rcn2 PE=1 SV=1</b>                                             | 1.126 | 1.014 | 1.070 | 1.110 | 1.158 | 1.088 |
| <b>MOB kinase activator 1B OS=Mus musculus GN=Mob1b PE=1 SV=3</b>                                     | 1.000 | 0.730 | 0.865 | 0.879 | 0.848 | 1.440 |
| <b>EGF-containing fibulin-like extracellular matrix protein 1 OS=Mus musculus GN=Efemp1 PE=1 SV=1</b> | 1.000 | 1.028 | 1.014 | 0.566 | 0.293 | 0.451 |
| <b>LIX1-like protein OS=Mus musculus GN=Lix1l PE=2 SV=2</b>                                           | 1.000 | 0.957 | 0.979 | 1.073 | 0.691 | 1.135 |
| <b>HEAT repeat-containing protein 3 OS=Mus musculus GN=Heatr3 PE=1 SV=1</b>                           | 1.000 | 0.994 | 0.997 | 0.818 | 0.994 | 0.896 |
| <b>Paralemmin-2 OS=Mus musculus GN=Palm2 PE=1 SV=1</b>                                                | 1.000 | 1.178 | 1.089 | 0.786 | 0.623 | 0.550 |
| <b>Sec1 family domain-containing protein 1 OS=Mus musculus GN=Scfd1 PE=1 SV=1</b>                     | 1.000 | 1.002 | 1.001 | 0.888 | 0.968 | 0.994 |
| <b>Filamin-A OS=Mus musculus GN=Flna PE=1 SV=5</b>                                                    | 1.160 | 1.286 | 1.223 | 1.487 | 1.599 | 1.492 |
| <b>Cleavage and polyadenylation specificity factor subunit 7 OS=Mus musculus GN=Cpsf7 PE=1 SV=2</b>   | 1.000 | 2.011 | 1.505 | 3.905 | 8.975 | 5.187 |
| <b>Exosome complex component MTR3 OS=Mus musculus GN=Exosc6 PE=1 SV=1</b>                             | 1.000 | 1.029 | 1.014 | 0.736 | 1.386 | 0.889 |
| <b>Isoleucine--tRNA ligase, cytoplasmic OS=Mus musculus GN=lars PE=1 SV=2</b>                         | 0.994 | 0.929 | 0.961 | 0.832 | 0.834 | 0.823 |
| <b>COP9 signalosome complex subunit 7b OS=Mus musculus GN=Cops7b PE=1 SV=1</b>                        | 1.000 | 0.983 | 0.991 | 0.721 | 0.562 | 0.757 |
| <b>Dihydropteridine reductase OS=Mus musculus GN=Qdpr PE=1 SV=2</b>                                   | 1.000 | 1.114 | 1.057 | 1.919 | 1.878 | 1.668 |
| <b>Axonemal dynein light intermediate polypeptide 1 OS=Mus musculus GN=Dnali1 PE=1 SV=1</b>           | 1.000 | 0.892 | 0.946 | 0.712 | 0.969 | 1.157 |
| <b>Protein phosphatase methyltransferase 1 OS=Mus musculus GN=Ppme1 PE=1 SV=5</b>                     | 1.000 | 1.151 | 1.076 | 1.600 | 1.645 | 1.193 |
| <b>ADP-ribose pyrophosphatase, mitochondrial OS=Mus musculus GN=Nudt9 PE=1 SV=1</b>                   | 1.000 | 1.163 | 1.082 | 2.225 | 3.376 | 2.767 |

|                                                                                                                         |       |        |       |       |       |       |
|-------------------------------------------------------------------------------------------------------------------------|-------|--------|-------|-------|-------|-------|
| <b>Metalloredoxase STEAP2 OS=Mus musculus<br/>GN=Steap2 PE=1 SV=1</b>                                                   | 1.000 | 0.915  | 0.957 | 1.355 | 0.728 | 1.535 |
| <b>3-ketoacyl-CoA thiolase, mitochondrial OS=Mus<br/>musculus GN=Acaa2 PE=1 SV=3</b>                                    | 1.000 | 0.819  | 0.909 | 0.803 | 0.766 | 0.663 |
| <b>La-related protein 4 OS=Mus musculus GN=Larp4<br/>PE=1 SV=2</b>                                                      | 1.000 | 1.203  | 1.102 | 0.585 | 0.417 | 1.071 |
| <b>Eukaryotic peptide chain release factor subunit 1<br/>OS=Mus musculus GN=Etf1 PE=1 SV=4</b>                          | 1.147 | 1.156  | 1.151 | 1.434 | 1.343 | 1.408 |
| <b>Probable G-protein coupled receptor 21 OS=Mus<br/>musculus GN=Gpr21 PE=2 SV=1</b>                                    | 1.000 | 0.986  | 0.993 | 1.181 | 0.911 | 1.253 |
| <b>Histone acetyltransferase type B catalytic subunit<br/>OS=Mus musculus GN=Hat1 PE=1 SV=1</b>                         | 1.000 | 1.066  | 1.033 | 1.926 | 2.128 | 2.829 |
| <b>TBC1 domain family member 17 OS=Mus<br/>musculus GN=Tbc1d17 PE=1 SV=2</b>                                            | 1.000 | 11.629 | 6.315 | 3.562 | 2.967 | 5.069 |
| <b>Vacuolar protein sorting-associated protein 26B<br/>OS=Mus musculus GN=Vps26b PE=1 SV=1</b>                          | 1.000 | 1.084  | 1.042 | 0.842 | 0.928 | 0.978 |
| <b>Isoaspartyl peptidase/L-asparaginase OS=Mus<br/>musculus GN=Asrgl1 PE=1 SV=1</b>                                     | 1.000 | 0.725  | 0.862 | 0.616 | 0.519 | 1.233 |
| <b>Prolyl endopeptidase-like OS=Mus musculus<br/>GN=Prepl PE=1 SV=1</b>                                                 | 1.000 | 0.870  | 0.935 | 1.428 | 0.923 | 1.294 |
| <b>Carbamoyl-phosphate synthase [ammonia],<br/>mitochondrial OS=Mus musculus GN=Cps1 PE=1<br/>SV=2</b>                  | 0.972 | 0.871  | 0.921 | 0.184 | 0.110 | 0.154 |
| <b>Thimet oligopeptidase OS=Mus musculus<br/>GN=Thop1 PE=1 SV=1</b>                                                     | 1.023 | 0.986  | 1.004 | 1.159 | 1.263 | 1.152 |
| <b>Septin-11 OS=Mus musculus GN=Sept11 PE=1<br/>SV=4</b>                                                                | 1.007 | 1.042  | 1.024 | 0.920 | 0.911 | 0.929 |
| <b>Kinetochore-associated protein 1 OS=Mus<br/>musculus GN=Kntc1 PE=1 SV=2</b>                                          | 1.000 | 1.041  | 1.021 | 0.990 | 0.993 | 0.892 |
| <b>Sterile alpha motif domain-containing protein 3<br/>OS=Mus musculus GN=Samd3 PE=2 SV=3</b>                           | 1.024 | 0.952  | 0.988 | 1.416 | 0.748 | 1.285 |
| <b>mRNA export factor OS=Mus musculus GN=Rae1<br/>PE=1 SV=1</b>                                                         | 1.000 | 0.890  | 0.945 | 0.663 | 0.553 | 0.505 |
| <b>Ubiquitin-like modifier-activating enzyme 6<br/>OS=Mus musculus GN=Uba6 PE=1 SV=1</b>                                | 1.000 | 0.980  | 0.990 | 0.879 | 1.011 | 0.888 |
| <b>NEDD8-activating enzyme E1 catalytic subunit<br/>OS=Mus musculus GN=Uba3 PE=1 SV=2</b>                               | 1.045 | 1.036  | 1.041 | 1.071 | 1.132 | 0.992 |
| <b>Protein ELFN1 OS=Mus musculus GN=Elfn1 PE=2<br/>SV=1</b>                                                             | 1.000 | 0.962  | 0.981 | 1.583 | 1.496 | 1.296 |
| <b>Pre-rRNA-processing protein TSR2 homolog<br/>OS=Mus musculus GN=Tsr2 PE=1 SV=1</b>                                   | 1.000 | 0.848  | 0.924 | 0.934 | 0.839 | 1.069 |
| <b>Liprin-beta-1 OS=Mus musculus GN=Ppfbp1 PE=1<br/>SV=3</b>                                                            | 1.000 | 0.961  | 0.981 | 0.691 | 0.612 | 0.735 |
| <b>A disintegrin and metalloproteinase with<br/>thrombospondin motifs 2 OS=Mus musculus<br/>GN=Adamts2 PE=1 SV=2</b>    | 1.000 | 1.057  | 1.028 | 0.715 | 0.684 | 0.656 |
| <b>Acetyl-CoA acetyltransferase, cytosolic OS=Mus<br/>musculus GN=Acat2 PE=1 SV=2</b>                                   | 1.018 | 0.795  | 0.906 | 1.055 | 1.016 | 0.970 |
| <b>WD repeat-containing protein 37 OS=Mus<br/>musculus GN=Wdr37 PE=1 SV=1</b>                                           | 1.000 | 1.216  | 1.108 | 1.405 | 0.898 | 1.184 |
| <b>Tsukushin OS=Mus musculus GN=Tsku PE=2 SV=2</b>                                                                      | 1.000 | 1.099  | 1.049 | 0.696 | 0.854 | 0.865 |
| <b>Polyadenylate-binding protein 2 OS=Mus<br/>musculus GN=Pabpn1 PE=1 SV=3</b>                                          | 0.987 | 0.925  | 0.956 | 1.150 | 1.318 | 1.256 |
| <b>Thioredoxin-like protein 1 OS=Mus musculus<br/>GN=Txnl1 PE=1 SV=3</b>                                                | 1.026 | 0.911  | 0.969 | 1.361 | 1.496 | 1.263 |
| <b>tRNA (adenine(58)-N(1))-methyltransferase non-<br/>catalytic subunit TRM6 OS=Mus musculus<br/>GN=Trmt6 PE=1 SV=1</b> | 1.068 | 2.305  | 1.686 | 4.314 | 4.422 | 3.262 |
| <b>Complement C1s-B subcomponent OS=Mus<br/>musculus GN=C1sb PE=2 SV=1</b>                                              | 1.000 | 1.283  | 1.142 | 1.560 | 1.619 | 1.887 |
| <b>Complement C1s-A subcomponent OS=Mus</b>                                                                             | 0.975 | 1.048  | 1.012 | 1.086 | 0.878 | 1.019 |

|                                                      |       |       |       |       |       |       |
|------------------------------------------------------|-------|-------|-------|-------|-------|-------|
| musculus GN=C1sa PE=2 SV=2                           |       |       |       |       |       |       |
| Complement C1r-A subcomponent OS=Mus                 | 0.957 | 1.059 | 1.008 | 0.994 | 0.934 | 1.021 |
| musculus GN=C1ra PE=1 SV=1                           |       |       |       |       |       |       |
| Structural maintenance of chromosomes protein 4      | 1.000 | 1.088 | 1.044 | 0.670 | 1.101 | 0.677 |
| OS=Mus musculus GN=Smc4 PE=1 SV=1                    |       |       |       |       |       |       |
| Protein phosphatase 1F OS=Mus musculus               | 1.000 | 1.087 | 1.043 | 1.311 | 1.786 | 1.231 |
| GN=Ppm1f PE=1 SV=1                                   |       |       |       |       |       |       |
| Bifunctional glutamate/proline--tRNA ligase          | 1.000 | 0.971 | 0.985 | 1.195 | 1.034 | 1.311 |
| OS=Mus musculus GN=Eprs PE=1 SV=4                    |       |       |       |       |       |       |
| Cell division cycle and apoptosis regulator protein  | 1.000 | 0.993 | 0.997 | 1.198 | 1.334 | 1.446 |
| 1 OS=Mus musculus GN=Ccar1 PE=1 SV=1                 |       |       |       |       |       |       |
| Phosphoglycolate phosphatase OS=Mus musculus         | 1.000 | 0.819 | 0.909 | 0.898 | 1.064 | 1.003 |
| GN=Pgp PE=1 SV=1                                     |       |       |       |       |       |       |
| Epsin-2 OS=Mus musculus GN=Epn2 PE=1 SV=1            | 1.000 | 0.725 | 0.862 | 0.361 | 0.597 | 0.043 |
| PDZ and LIM domain protein 5 OS=Mus musculus         | 1.080 | 1.055 | 1.068 | 1.255 | 1.405 | 1.233 |
| GN=Pdlm5 PE=1 SV=4                                   |       |       |       |       |       |       |
| Glycogen phosphorylase, brain form OS=Mus            | 1.028 | 1.243 | 1.135 | 1.398 | 1.344 | 1.317 |
| musculus GN=Pygb PE=1 SV=3                           |       |       |       |       |       |       |
| Fermitin family homolog 2 OS=Mus musculus            | 0.852 | 0.993 | 0.923 | 1.052 | 1.218 | 1.116 |
| GN=Fermt2 PE=1 SV=1                                  |       |       |       |       |       |       |
| Coatomer subunit alpha OS=Mus musculus               | 0.970 | 0.950 | 0.960 | 0.994 | 0.998 | 1.029 |
| GN=Copa PE=1 SV=2                                    |       |       |       |       |       |       |
| Biotinidase OS=Mus musculus GN=Btd PE=1 SV=2         | 1.000 | 0.766 | 0.883 | 0.452 | 0.679 | 0.568 |
| Protein arginine N-methyltransferase 5 OS=Mus        | 1.000 | 0.789 | 0.894 | 1.025 | 0.755 | 0.749 |
| musculus GN=Prmt5 PE=1 SV=3                          |       |       |       |       |       |       |
| Protein argonaute-2 OS=Mus musculus GN=Ago2          | 1.000 | 0.859 | 0.929 | 0.726 | 0.645 | 0.893 |
| PE=1 SV=3                                            |       |       |       |       |       |       |
| Hydroxymethylglutaryl-CoA synthase, cytoplasmic      | 1.000 | 0.883 | 0.942 | 1.301 | 1.201 | 1.117 |
| OS=Mus musculus GN=Hmgcs1 PE=1 SV=1                  |       |       |       |       |       |       |
| Parafibromin OS=Mus musculus GN=Cdc73 PE=1           | 1.000 | 0.912 | 0.956 | 1.301 | 0.988 | 0.614 |
| SV=1                                                 |       |       |       |       |       |       |
| Eukaryotic translation initiation factor 3 subunit B | 0.836 | 0.993 | 0.915 | 1.336 | 1.345 | 1.314 |
| OS=Mus musculus GN=Eif3b PE=1 SV=1                   |       |       |       |       |       |       |
| Translation machinery-associated protein 7           | 1.000 | 1.490 | 1.245 | 5.524 | 2.859 | 3.104 |
| OS=Mus musculus GN=Tma7 PE=3 SV=1                    |       |       |       |       |       |       |
| GDP-mannose 4,6 dehydratase OS=Mus musculus          | 1.000 | 1.032 | 1.016 | 1.115 | 1.221 | 0.987 |
| GN=Gmds PE=1 SV=1                                    |       |       |       |       |       |       |
| Protein unc-13 homolog C OS=Mus musculus             | 1.000 | 1.100 | 1.050 | 0.934 | 1.045 | 0.860 |
| GN=Unc13c PE=1 SV=3                                  |       |       |       |       |       |       |
| Aldose 1-epimerase OS=Mus musculus GN=Galm           | 0.840 | 0.886 | 0.863 | 1.498 | 1.815 | 1.994 |
| PE=1 SV=1                                            |       |       |       |       |       |       |
| Pyridoxal kinase OS=Mus musculus GN=Pdxk             | 1.000 | 0.922 | 0.961 | 1.342 | 0.921 | 0.743 |
| PE=1 SV=1                                            |       |       |       |       |       |       |
| CCA tRNA nucleotidyltransferase 1, mitochondrial     | 1.000 | 1.070 | 1.035 | 1.452 | 1.426 | 1.320 |
| OS=Mus musculus GN=Trnt1 PE=1 SV=1                   |       |       |       |       |       |       |
| Dynamin-1-like protein OS=Mus musculus               | 1.000 | 0.931 | 0.966 | 1.025 | 0.885 | 1.047 |
| GN=Dnm1l PE=1 SV=2                                   |       |       |       |       |       |       |
| Pleckstrin homology-like domain family B             | 1.000 | 0.982 | 0.991 | 0.725 | 0.488 | 0.611 |
| member 2 OS=Mus musculus GN=Phldb2 PE=1              |       |       |       |       |       |       |
| SV=2                                                 |       |       |       |       |       |       |
| Serine/threonine-protein kinase Nek9 OS=Mus          | 1.000 | 0.923 | 0.961 | 0.743 | 1.145 | 1.046 |
| musculus GN=Nek9 PE=1 SV=2                           |       |       |       |       |       |       |
| Placenta-specific protein 9 OS=Mus musculus          | 1.000 | 0.920 | 0.960 | 0.198 | 0.125 | 0.219 |
| GN=Plac9 PE=2 SV=1                                   |       |       |       |       |       |       |
| Actin-binding protein anillin OS=Mus musculus        | 1.000 | 0.930 | 0.965 | 0.712 | 1.040 | 1.011 |
| GN=Anln PE=1 SV=2                                    |       |       |       |       |       |       |
| Beta-mannosidase OS=Mus musculus GN=Manba            | 1.000 | 0.793 | 0.896 | 0.825 | 0.380 | 0.653 |
| PE=1 SV=1                                            |       |       |       |       |       |       |
| Zinc finger protein 668 OS=Mus musculus              | 1.000 | 1.376 | 1.188 | 2.052 | 0.988 | 1.318 |
| GN=Znf668 PE=2 SV=1                                  |       |       |       |       |       |       |
| Matrin-3 OS=Mus musculus GN=Matr3 PE=1 SV=1          | 1.000 | 1.004 | 1.002 | 1.072 | 1.504 | 1.053 |



|                                                                                                          |       |       |       |       |        |       |
|----------------------------------------------------------------------------------------------------------|-------|-------|-------|-------|--------|-------|
| DNA/RNA-binding protein KIN17 OS=Mus musculus GN=Kin PE=1 SV=1                                           | 1.000 | 0.828 | 0.914 | 0.808 | 0.651  | 0.890 |
| 7SK snRNA methylphosphate capping enzyme OS=Mus musculus GN=Mepce PE=1 SV=2                              | 1.000 | 3.771 | 2.386 | 9.639 | 10.589 | 9.942 |
| Protein LZIC OS=Mus musculus GN=Lzic PE=1 SV=1                                                           | 1.036 | 0.863 | 0.949 | 0.751 | 1.253  | 0.883 |
| EMILIN-2 OS=Mus musculus GN=Emilin2 PE=1 SV=1                                                            | 1.000 | 0.942 | 0.971 | 0.872 | 0.726  | 0.984 |
| Latent-transforming growth factor beta-binding protein 4 OS=Mus musculus GN=Ltbp4 PE=1 SV=2              | 0.929 | 0.834 | 0.882 | 0.526 | 0.471  | 0.488 |
| COMM domain-containing protein 1 OS=Mus musculus GN=Commd1 PE=1 SV=2                                     | 1.000 | 0.757 | 0.879 | 0.462 | 0.602  | 0.446 |
| Collectin-12 OS=Mus musculus GN=Colec12 PE=1 SV=1                                                        | 1.000 | 0.995 | 0.997 | 1.144 | 1.006  | 1.167 |
| NAD(P)H-hydrate epimerase OS=Mus musculus GN=Apoa1bp PE=1 SV=1                                           | 0.992 | 1.047 | 1.019 | 1.074 | 1.181  | 0.975 |
| Splicing factor 3A subunit 1 OS=Mus musculus GN=Sf3a1 PE=1 SV=1                                          | 1.000 | 0.949 | 0.975 | 1.248 | 1.242  | 1.271 |
| Out at first protein homolog OS=Mus musculus GN=Oaf PE=2 SV=1                                            | 1.022 | 1.147 | 1.084 | 3.045 | 2.540  | 2.339 |
| DNA-binding death effector domain-containing protein 2 OS=Mus musculus GN=Dedd2 PE=2 SV=1                | 1.000 | 0.930 | 0.965 | 0.876 | 0.853  | 1.160 |
| Eukaryotic translation initiation factor 3 subunit L OS=Mus musculus GN=Eif3l PE=1 SV=1                  | 1.052 | 1.090 | 1.071 | 1.248 | 1.197  | 1.289 |
| Splicing factor 3B subunit 4 OS=Mus musculus GN=Sf3b4 PE=1 SV=1                                          | 0.899 | 0.967 | 0.933 | 1.262 | 1.201  | 1.360 |
| Aminoacyl tRNA synthase complex-interacting multifunctional protein 2 OS=Mus musculus GN=Aimp2 PE=1 SV=2 | 1.000 | 1.027 | 1.014 | 1.159 | 0.872  | 0.862 |
| Bleomycin hydrolase OS=Mus musculus GN=Blmh PE=1 SV=1                                                    | 1.000 | 0.909 | 0.955 | 1.162 | 0.999  | 1.003 |
| Eukaryotic peptide chain release factor GTP-binding subunit ERF3A OS=Mus musculus GN=Gsp1 PE=1 SV=2      | 1.000 | 0.894 | 0.947 | 1.158 | 1.242  | 1.245 |
| Heterogeneous nuclear ribonucleoprotein L OS=Mus musculus GN=Hnnp1 PE=1 SV=2                             | 1.089 | 1.225 | 1.157 | 1.749 | 1.965  | 2.156 |
| General transcription factor IIF subunit 2 OS=Mus musculus GN=Gtf2f2 PE=1 SV=1                           | 1.000 | 0.893 | 0.946 | 1.255 | 1.132  | 1.008 |
| Sulfatase-modifying factor 1 OS=Mus musculus GN=Sumf1 PE=1 SV=2                                          | 1.000 | 0.974 | 0.987 | 1.014 | 0.769  | 1.214 |
| Epiplakin OS=Mus musculus GN=Eppk1 PE=1 SV=2                                                             | 1.000 | 0.927 | 0.964 | 1.255 | 0.905  | 1.565 |
| Acylamino-acid-releasing enzyme OS=Mus musculus GN=Apeh PE=1 SV=3                                        | 1.000 | 1.050 | 1.025 | 0.803 | 0.657  | 0.677 |
| ERO1-like protein alpha OS=Mus musculus GN=Ero1a PE=1 SV=2                                               | 1.000 | 0.906 | 0.953 | 0.546 | 0.563  | 0.772 |
| Dedicator of cytokinesis protein 7 OS=Mus musculus GN=Dock7 PE=1 SV=3                                    | 1.000 | 1.434 | 1.217 | 1.233 | 1.563  | 1.779 |
| Eukaryotic translation initiation factor 3 subunit C OS=Mus musculus GN=Eif3c PE=1 SV=1                  | 1.064 | 1.175 | 1.119 | 1.501 | 1.381  | 1.516 |
| Niban-like protein 1 OS=Mus musculus GN=Fam129b PE=1 SV=2                                                | 1.000 | 1.203 | 1.102 | 1.519 | 1.681  | 1.540 |
| Putative hydroxypyruvate isomerase OS=Mus musculus GN=Hyi PE=1 SV=2                                      | 1.000 | 0.906 | 0.953 | 0.750 | 0.683  | 0.757 |
| Angiopoietin-related protein 7 OS=Mus musculus GN=Angptl7 PE=2 SV=1                                      | 1.000 | 1.009 | 1.004 | 1.411 | 1.006  | 1.563 |
| Spartin OS=Mus musculus GN=Spg20 PE=1 SV=1                                                               | 1.000 | 1.123 | 1.062 | 1.014 | 0.782  | 0.819 |
| Coiled-coil domain-containing protein 80 OS=Mus musculus GN=Ccdc80 PE=1 SV=2                             | 1.050 | 0.979 | 1.014 | 0.642 | 0.511  | 0.619 |
| Tripartite motif-containing protein 29 OS=Mus musculus GN=Trim29 PE=1 SV=1                               | 1.000 | 0.913 | 0.956 | 0.633 | 0.598  | 0.639 |
| Cell surface glycoprotein MUC18 OS=Mus                                                                   | 1.000 | 0.995 | 0.997 | 0.994 | 0.821  | 1.017 |

|                                                                                     |       |       |       |       |       |        |
|-------------------------------------------------------------------------------------|-------|-------|-------|-------|-------|--------|
| musculus GN=Mcam PE=1 SV=1                                                          |       |       |       |       |       |        |
| Ubiquilin-1 OS=Mus musculus GN=Ubqln1 PE=1 SV=1                                     | 0.959 | 0.958 | 0.959 | 1.106 | 1.034 | 0.932  |
| Paraspeckle component 1 OS=Mus musculus GN=Pspc1 PE=1 SV=1                          | 1.000 | 1.057 | 1.029 | 1.225 | 1.195 | 1.347  |
| COMM domain-containing protein 5 OS=Mus musculus GN=Comm5 PE=1 SV=1                 | 1.000 | 1.183 | 1.092 | 2.481 | 2.636 | 2.386  |
| Coiled-coil domain-containing protein 58 OS=Mus musculus GN=Ccdc58 PE=1 SV=1        | 1.000 | 0.781 | 0.891 | 0.556 | 0.658 | 0.796  |
| CD109 antigen OS=Mus musculus GN=Cd109 PE=1 SV=1                                    | 1.000 | 0.857 | 0.929 | 0.731 | 0.713 | 0.809  |
| Ataxin-7 OS=Mus musculus GN=Atxn7 PE=1 SV=2                                         | 1.000 | 1.056 | 1.028 | 1.235 | 0.840 | 0.946  |
| SH3 domain-containing kinase-binding protein 1 OS=Mus musculus GN=Sh3kbp1 PE=1 SV=1 | 1.076 | 1.084 | 1.080 | 1.381 | 1.793 | 1.049  |
| Beta-actin OS=Mus musculus GN=Actr1b PE=1 SV=1                                      | 1.000 | 0.995 | 0.998 | 1.256 | 1.155 | 1.327  |
| COP9 signalosome complex subunit 8 OS=Mus musculus GN=Cops8 PE=1 SV=1               | 1.072 | 1.013 | 1.042 | 1.243 | 1.175 | 1.148  |
| NEDD8-activating enzyme E1 regulatory subunit OS=Mus musculus GN=Nae1 PE=1 SV=1     | 1.000 | 1.074 | 1.037 | 1.323 | 1.203 | 1.423  |
| Solute carrier family 22 member 6 OS=Mus musculus GN=Slc22a6 PE=1 SV=1              | 1.000 | 1.168 | 1.084 | 0.866 | 0.833 | 6.185  |
| U6 snRNA-associated Sm-like protein LSm1 OS=Mus musculus GN=Lsm1 PE=1 SV=1          | 1.000 | 0.909 | 0.955 | 0.824 | 0.533 | 0.615  |
| Soluble calcium-activated nucleotidase 1 OS=Mus musculus GN=Cant1 PE=2 SV=1         | 1.000 | 0.872 | 0.936 | 0.694 | 0.671 | 0.700  |
| Cystathionine gamma-lyase OS=Mus musculus GN=Cth PE=1 SV=1                          | 0.907 | 1.041 | 0.974 | 1.714 | 1.231 | 1.491  |
| Aminopeptidase B OS=Mus musculus GN=Rnpep PE=1 SV=2                                 | 1.000 | 1.514 | 1.257 | 1.779 | 1.475 | 1.970  |
| Huntingtin-interacting protein 1 OS=Mus musculus GN=Hip1 PE=1 SV=2                  | 1.000 | 1.156 | 1.078 | 1.294 | 0.776 | 1.211  |
| Myosin-9 OS=Mus musculus GN=Myh9 PE=1 SV=4                                          | 0.914 | 0.950 | 0.932 | 0.816 | 0.995 | 0.812  |
| Vigilin OS=Mus musculus GN=Hdlbp PE=1 SV=1                                          | 1.000 | 0.769 | 0.885 | 0.573 | 0.404 | 0.600  |
| 26S proteasome non-ATPase regulatory subunit 2 OS=Mus musculus GN=Psmd2 PE=1 SV=1   | 1.071 | 1.034 | 1.053 | 1.061 | 1.043 | 1.053  |
| ATP-dependent RNA helicase DDX39A OS=Mus musculus GN=Ddx39a PE=1 SV=1               | 1.062 | 1.115 | 1.088 | 1.318 | 1.407 | 1.439  |
| Meteorin-like protein OS=Mus musculus GN=Metrnl PE=1 SV=1                           | 1.000 | 0.969 | 0.984 | 0.873 | 0.589 | 0.882  |
| Keratin, type II cytoskeletal 79 OS=Mus musculus GN=Krt79 PE=1 SV=2                 | 1.000 | 0.758 | 0.879 | 0.158 | 0.273 | 0.205  |
| LIM and cysteine-rich domains protein 1 OS=Mus musculus GN=Lmcd1 PE=1 SV=1          | 1.000 | 0.931 | 0.965 | 0.947 | 0.820 | 0.972  |
| EPM2A-interacting protein 1 OS=Mus musculus GN=Epm2aip1 PE=1 SV=1                   | 1.000 | 1.194 | 1.097 | 1.016 | 0.817 | 0.948  |
| Heterogeneous nuclear ribonucleoprotein U OS=Mus musculus GN=Hnrnpu PE=1 SV=1       | 0.982 | 1.005 | 0.993 | 1.353 | 1.332 | 1.334  |
| RNA-binding protein 39 OS=Mus musculus GN=Rbm39 PE=1 SV=2                           | 0.042 | 5.877 | 2.960 | 2.144 | 9.724 | 10.959 |
| Ras-related protein Rab-40C OS=Mus musculus GN=Rab40c PE=1 SV=1                     | 1.000 | 0.987 | 0.993 | 1.283 | 0.888 | 1.537  |
| Filamin-C OS=Mus musculus GN=Flnc PE=1 SV=3                                         | 1.054 | 1.092 | 1.073 | 1.104 | 1.250 | 1.050  |
| Splicing factor, proline- and glutamine-rich OS=Mus musculus GN=Sfpq PE=1 SV=1      | 1.111 | 1.255 | 1.183 | 2.387 | 3.087 | 2.297  |
| Anamorsin OS=Mus musculus GN=Ciapi1 PE=1 SV=1                                       | 1.000 | 1.398 | 1.199 | 0.999 | 1.011 | 1.180  |
| Cytosolic acyl coenzyme A thioester hydrolase OS=Mus musculus GN=Acot7 PE=1 SV=2    | 1.000 | 1.117 | 1.059 | 2.000 | 2.964 | 2.252  |
| Ras-related protein Rab-14 OS=Mus musculus GN=Rab14 PE=1 SV=3                       | 1.000 | 1.027 | 1.013 | 1.207 | 1.612 | 1.032  |

|                                                                                                  |       |       |       |       |       |       |
|--------------------------------------------------------------------------------------------------|-------|-------|-------|-------|-------|-------|
| Isochorismatase domain-containing protein 1<br>OS=Mus musculus GN=Isoc1 PE=1 SV=1                | 1.000 | 0.985 | 0.992 | 1.317 | 1.124 | 1.304 |
| Ester hydrolase C11orf54 homolog OS=Mus<br>musculus PE=1 SV=1                                    | 1.000 | 0.832 | 0.916 | 0.831 | 0.940 | 1.050 |
| ATP-citrate synthase OS=Mus musculus GN=Acly<br>PE=1 SV=1                                        | 1.078 | 1.094 | 1.086 | 1.214 | 1.389 | 1.369 |
| Sorting nexin-9 OS=Mus musculus GN=Snx9 PE=1<br>SV=1                                             | 1.000 | 0.953 | 0.976 | 1.117 | 0.933 | 1.300 |
| Ribonuclease inhibitor OS=Mus musculus<br>GN=Rnh1 PE=1 SV=1                                      | 0.950 | 0.962 | 0.956 | 1.266 | 1.132 | 1.129 |
| Polyglutamine-binding protein 1 OS=Mus<br>musculus GN=Pqbp1 PE=1 SV=1                            | 1.000 | 1.153 | 1.076 | 1.610 | 2.521 | 3.015 |
| Basic leucine zipper and W2 domain-containing<br>protein 2 OS=Mus musculus GN=Bzw2 PE=1 SV=1     | 1.000 | 1.369 | 1.185 | 2.067 | 3.052 | 2.464 |
| RNA binding motif protein, X-linked-like-1<br>OS=Mus musculus GN=Rbmxl1 PE=2 SV=1                | 1.000 | 0.778 | 0.889 | 1.515 | 2.016 | 1.833 |
| ATP-dependent RNA helicase DDX1 OS=Mus<br>musculus GN=Ddx1 PE=1 SV=1                             | 0.995 | 0.997 | 0.996 | 1.001 | 1.316 | 1.255 |
| Protein BRICK1 OS=Mus musculus GN=Brk1 PE=1<br>SV=1                                              | 1.000 | 1.291 | 1.145 | 2.269 | 2.826 | 3.827 |
| Protein FAM3C OS=Mus musculus GN=Fam3c PE=1<br>SV=1                                              | 1.000 | 1.219 | 1.109 | 1.242 | 1.598 | 0.943 |
| SH3 domain-binding glutamic acid-rich-like<br>protein 3 OS=Mus musculus GN=Sh3bglr3 PE=1<br>SV=1 | 1.000 | 1.048 | 1.024 | 1.065 | 0.821 | 0.683 |
| Ubiquitin-associated protein 2 OS=Mus musculus<br>GN=Ubp2 PE=1 SV=1                              | 1.000 | 0.911 | 0.956 | 1.441 | 1.166 | 1.027 |
| Ubiquitin-like protein 7 OS=Mus musculus<br>GN=Ubl7 PE=1 SV=2                                    | 1.000 | 1.004 | 1.002 | 1.049 | 0.976 | 1.878 |
| Thioredoxin domain-containing protein 5 OS=Mus<br>musculus GN=Txndc5 PE=1 SV=2                   | 1.042 | 1.133 | 1.087 | 1.216 | 1.248 | 1.261 |
| Far upstream element-binding protein 1 OS=Mus<br>musculus GN=Fubp1 PE=1 SV=1                     | 1.000 | 0.979 | 0.990 | 1.289 | 1.548 | 1.169 |
| Eukaryotic translation initiation factor 3 subunit<br>H OS=Mus musculus GN=Elf3h PE=1 SV=1       | 0.896 | 0.895 | 0.896 | 1.097 | 1.494 | 1.280 |
| Glycine cleavage system H protein, mitochondrial<br>OS=Mus musculus GN=Gcsh PE=1 SV=2            | 1.000 | 0.874 | 0.937 | 0.763 | 1.377 | 0.858 |
| DnaJ homolog subfamily C member 9 OS=Mus<br>musculus GN=Dnajc9 PE=1 SV=2                         | 1.000 | 0.978 | 0.989 | 0.938 | 1.070 | 1.122 |
| Serine protease inhibitor A3N OS=Mus musculus<br>GN=Serpina3n PE=1 SV=1                          | 0.966 | 0.963 | 0.965 | 0.594 | 0.552 | 0.643 |
| Tyrosine--tRNA ligase, cytoplasmic OS=Mus<br>musculus GN=Yars PE=1 SV=3                          | 1.000 | 0.967 | 0.983 | 1.032 | 1.284 | 1.182 |
| Neurocalcin-delta OS=Mus musculus GN=Ncald<br>PE=1 SV=4                                          | 1.000 | 0.777 | 0.888 | 0.432 | 0.610 | 0.428 |
| Golgi membrane protein 1 OS=Mus musculus<br>GN=Golm1 PE=1 SV=2                                   | 1.000 | 0.880 | 0.940 | 0.897 | 0.727 | 0.630 |
| Brain acid soluble protein 1 OS=Mus musculus<br>GN=Basp1 PE=1 SV=3                               | 0.932 | 1.020 | 0.976 | 1.603 | 1.949 | 1.405 |
| Importin-9 OS=Mus musculus GN=Ipo9 PE=1 SV=3                                                     | 1.000 | 0.820 | 0.910 | 0.730 | 0.550 | 0.441 |
| Atlastin-3 OS=Mus musculus GN=Atl3 PE=1 SV=1                                                     | 1.000 | 0.834 | 0.917 | 0.599 | 0.520 | 0.993 |
| Twinfilin-1 OS=Mus musculus GN=Twf1 PE=1<br>SV=2                                                 | 0.961 | 1.020 | 0.990 | 1.531 | 1.139 | 1.373 |
| Methyltransferase-like protein 13 OS=Mus<br>musculus GN=Mettl13 PE=1 SV=1                        | 1.000 | 0.816 | 0.908 | 0.966 | 1.517 | 1.215 |
| DnaJ homolog subfamily C member 3 OS=Mus<br>musculus GN=Dnajc3 PE=1 SV=1                         | 0.929 | 0.911 | 0.920 | 0.938 | 0.758 | 0.903 |
| Glyoxylate reductase/hydroxypyruvate reductase<br>OS=Mus musculus GN=Grhpr PE=1 SV=1             | 1.000 | 0.991 | 0.995 | 0.488 | 0.650 | 0.811 |
| UTP--glucose-1-phosphate uridylyltransferase<br>OS=Mus musculus GN=Ugp2 PE=1 SV=3                | 0.977 | 0.918 | 0.947 | 1.251 | 1.124 | 1.171 |

|                                                                                         |       |       |       |       |       |       |
|-----------------------------------------------------------------------------------------|-------|-------|-------|-------|-------|-------|
| Prolow-density lipoprotein receptor-related protein 1 OS=Mus musculus GN=Lrp1 PE=1 SV=1 | 1.000 | 1.004 | 1.002 | 0.787 | 0.768 | 1.012 |
| Retinoid-inducible serine carboxypeptidase OS=Mus musculus GN=Scpep1 PE=1 SV=2          | 1.029 | 0.977 | 1.003 | 1.154 | 0.957 | 1.109 |
| FACT complex subunit SPT16 OS=Mus musculus GN=Supt16h PE=1 SV=2                         | 0.948 | 0.905 | 0.926 | 1.284 | 1.232 | 1.345 |
| Farnesyl pyrophosphate synthase OS=Mus musculus GN=Fdps PE=1 SV=1                       | 1.151 | 0.999 | 1.075 | 1.122 | 1.356 | 1.310 |
| Protein bicaudal D homolog 2 OS=Mus musculus GN=Bicd2 PE=1 SV=1                         | 1.000 | 0.924 | 0.962 | 0.688 | 0.754 | 1.133 |
| TAR DNA-binding protein 43 OS=Mus musculus GN=Tardbp PE=1 SV=1                          | 0.876 | 1.042 | 0.959 | 1.687 | 1.745 | 1.509 |
| Heterogeneous nuclear ribonucleoprotein L-like OS=Mus musculus GN=Hnrnp1l PE=1 SV=3     | 1.000 | 1.117 | 1.058 | 1.383 | 1.151 | 1.148 |
| Kelch domain-containing protein 4 OS=Mus musculus GN=Klhdc4 PE=2 SV=2                   | 1.000 | 1.174 | 1.087 | 1.185 | 1.634 | 1.575 |
| Exosome complex component RRP41 OS=Mus musculus GN=Exosc4 PE=1 SV=3                     | 1.000 | 1.332 | 1.166 | 0.820 | 0.939 | 1.528 |
| Splicing factor 3B subunit 3 OS=Mus musculus GN=Sf3b3 PE=1 SV=1                         | 1.080 | 1.012 | 1.046 | 1.113 | 1.112 | 1.162 |
| Protein FAM49B OS=Mus musculus GN=Fam49b PE=1 SV=1                                      | 1.000 | 0.940 | 0.970 | 1.043 | 0.774 | 0.886 |
| Aspartate--tRNA ligase, cytoplasmic OS=Mus musculus GN=Dars PE=1 SV=2                   | 1.000 | 1.008 | 1.004 | 1.813 | 1.174 | 1.816 |
| Tubulin beta-6 chain OS=Mus musculus GN=Tubb6 PE=1 SV=1                                 | 1.083 | 1.067 | 1.075 | 1.251 | 1.370 | 1.315 |
| CAP-Gly domain-containing linker protein 1 OS=Mus musculus GN=Clip1 PE=1 SV=1           | 1.000 | 0.597 | 0.798 | 0.872 | 0.922 | 0.781 |
| Probable 28S rRNA (cytosine-C(5))-methyltransferase OS=Mus musculus GN=Nop2 PE=1 SV=1   | 1.000 | 1.052 | 1.026 | 1.002 | 1.116 | 0.998 |
| Protein disulfide-isomerase A6 OS=Mus musculus GN=Pdia6 PE=1 SV=3                       | 1.049 | 1.096 | 1.073 | 1.057 | 1.006 | 1.096 |
| Keratin, type II cytoskeletal 5 OS=Mus musculus GN=Krt5 PE=1 SV=1                       | 1.000 | 1.053 | 1.027 | 0.355 | 0.644 | 0.510 |
| Mannose-6-phosphate isomerase OS=Mus musculus GN=Mpi PE=1 SV=1                          | 1.000 | 1.299 | 1.149 | 1.653 | 1.617 | 1.556 |
| Zinc finger transcription factor Trps1 OS=Mus musculus GN=Trps1 PE=1 SV=1               | 1.000 | 1.734 | 1.367 | 0.699 | 1.022 | 1.717 |
| Transaldolase OS=Mus musculus GN=Taldo1 PE=1 SV=2                                       | 1.045 | 0.988 | 1.017 | 1.667 | 2.085 | 1.453 |
| Heterogeneous nuclear ribonucleoprotein A/B OS=Mus musculus GN=Hnrnpab PE=1 SV=1        | 0.988 | 0.974 | 0.981 | 1.828 | 2.812 | 1.979 |
| THUMP domain-containing protein 1 OS=Mus musculus GN=Thumpd1 PE=1 SV=1                  | 1.000 | 0.909 | 0.954 | 1.712 | 1.707 | 1.271 |
| Nuclear receptor-binding protein OS=Mus musculus GN=Nrbp1 PE=1 SV=1                     | 1.000 | 0.962 | 0.981 | 0.956 | 1.387 | 1.125 |
| Diphosphomevalonate decarboxylase OS=Mus musculus GN=Mvd PE=1 SV=2                      | 0.817 | 0.865 | 0.841 | 1.174 | 1.118 | 1.302 |
| PC4 and SFRS1-interacting protein OS=Mus musculus GN=Psip1 PE=1 SV=1                    | 1.084 | 1.063 | 1.073 | 1.652 | 1.634 | 1.401 |
| 26S proteasome non-ATPase regulatory subunit 6 OS=Mus musculus GN=Psm6 PE=1 SV=1        | 0.944 | 0.968 | 0.956 | 1.004 | 1.249 | 1.089 |
| Ras-related protein Rap-1b OS=Mus musculus GN=Rap1b PE=1 SV=2                           | 1.000 | 1.109 | 1.055 | 1.150 | 1.607 | 1.240 |
| Tubulointerstitial nephritis antigen-like OS=Mus musculus GN=Tinagl1 PE=1 SV=1          | 1.000 | 1.558 | 1.279 | 0.573 | 0.670 | 0.912 |
| Aminoacylase-1 OS=Mus musculus GN=Acy1 PE=1 SV=1                                        | 1.000 | 0.893 | 0.946 | 0.717 | 0.689 | 1.175 |
| Golgi reassembly-stacking protein 2 OS=Mus musculus GN=Gorasp2 PE=1 SV=3                | 0.945 | 1.172 | 1.058 | 1.211 | 1.088 | 1.747 |

|                                                                                               |       |       |       |        |        |        |
|-----------------------------------------------------------------------------------------------|-------|-------|-------|--------|--------|--------|
| Eukaryotic translation initiation factor 3 subunit M OS=Mus musculus GN=Eif3m PE=1 SV=1       | 1.007 | 1.003 | 1.005 | 1.039  | 1.011  | 1.139  |
| Actin-related protein 3 OS=Mus musculus GN=Actr3 PE=1 SV=3                                    | 0.966 | 1.018 | 0.992 | 1.120  | 1.070  | 1.140  |
| EMILIN-1 OS=Mus musculus GN=Emilin1 PE=1 SV=1                                                 | 0.977 | 0.969 | 0.973 | 0.723  | 0.629  | 0.812  |
| Non-POU domain-containing octamer-binding protein OS=Mus musculus GN=Nono PE=1 SV=3           | 0.971 | 0.774 | 0.872 | 0.829  | 0.864  | 1.006  |
| Plastin-3 OS=Mus musculus GN=Pls3 PE=1 SV=3                                                   | 1.024 | 1.144 | 1.084 | 1.574  | 1.694  | 1.418  |
| Phosphoserine aminotransferase OS=Mus musculus GN=Psat1 PE=1 SV=1                             | 1.012 | 0.991 | 1.001 | 1.404  | 1.280  | 1.417  |
| von Willebrand factor A domain-containing protein 5A OS=Mus musculus GN=Vwa5a PE=1 SV=2       | 1.000 | 1.161 | 1.080 | 1.211  | 1.078  | 1.248  |
| RNA-binding protein 10 OS=Mus musculus GN=Rbm10 PE=1 SV=1                                     | 1.000 | 0.915 | 0.957 | 1.222  | 0.906  | 1.215  |
| Aconitate hydratase, mitochondrial OS=Mus musculus GN=Aco2 PE=1 SV=1                          | 1.000 | 0.911 | 0.956 | 0.872  | 1.279  | 0.850  |
| Dynactin subunit 2 OS=Mus musculus GN=Dctn2 PE=1 SV=3                                         | 0.965 | 0.999 | 0.982 | 1.164  | 1.090  | 1.009  |
| Dipeptidyl peptidase 3 OS=Mus musculus GN=Dpp3 PE=1 SV=2                                      | 1.080 | 1.117 | 1.098 | 0.961  | 0.949  | 1.076  |
| Clathrin interactor 1 OS=Mus musculus GN=Clint1 PE=1 SV=2                                     | 1.011 | 1.233 | 1.122 | 3.697  | 3.017  | 2.950  |
| Pre-mRNA-processing factor 19 OS=Mus musculus GN=Prpf19 PE=1 SV=1                             | 1.000 | 1.004 | 1.002 | 1.491  | 1.680  | 1.449  |
| Nicotinamide phosphoribosyltransferase OS=Mus musculus GN=Nampt PE=1 SV=1                     | 0.869 | 1.013 | 0.941 | 1.749  | 2.170  | 1.759  |
| Eukaryotic translation initiation factor 2 subunit 2 OS=Mus musculus GN=Eif2s2 PE=1 SV=1      | 0.981 | 0.996 | 0.989 | 1.508  | 1.748  | 1.489  |
| Hsc70-interacting protein OS=Mus musculus GN=St13 PE=1 SV=1                                   | 0.994 | 1.037 | 1.016 | 2.104  | 2.730  | 2.312  |
| Methionine adenosyltransferase 2 subunit beta OS=Mus musculus GN=Mat2b PE=1 SV=1              | 1.000 | 0.710 | 0.855 | 1.300  | 0.624  | 0.922  |
| Electron transfer flavoprotein subunit alpha, mitochondrial OS=Mus musculus GN=Etfa PE=1 SV=2 | 1.000 | 1.000 | 1.000 | 1.000  | 1.000  | 15.740 |
| N(G),N(G)-dimethylarginine dimethylaminohydrolase 2 OS=Mus musculus GN=Ddah2 PE=1 SV=1        | 1.000 | 0.992 | 0.996 | 1.120  | 1.072  | 1.276  |
| Translation initiation factor eIF-2B subunit beta OS=Mus musculus GN=Eif2b2 PE=1 SV=1         | 1.000 | 1.587 | 1.294 | 2.900  | 3.473  | 3.965  |
| Tissue alpha-L-fucosidase OS=Mus musculus GN=Fuca1 PE=1 SV=1                                  | 1.000 | 1.601 | 1.300 | 1.757  | 1.143  | 1.735  |
| Deoxyhypusine hydroxylase OS=Mus musculus GN=Dohh PE=1 SV=2                                   | 1.000 | 0.811 | 0.905 | 0.705  | 1.069  | 1.131  |
| GrpE protein homolog 1, mitochondrial OS=Mus musculus GN=Grpel1 PE=1 SV=1                     | 1.041 | 0.892 | 0.966 | 0.627  | 0.939  | 0.735  |
| Phosphoserine phosphatase OS=Mus musculus GN=Psph PE=1 SV=1                                   | 1.000 | 0.990 | 0.995 | 1.196  | 1.182  | 1.025  |
| Protein deglycase DJ-1 OS=Mus musculus GN=Park7 PE=1 SV=1                                     | 1.058 | 1.031 | 1.044 | 1.292  | 1.217  | 1.268  |
| Multiple myeloma tumor-associated protein 2 homolog OS=Mus musculus GN=Mmtag2 PE=2 SV=1       | 1.000 | 0.964 | 0.982 | 1.271  | 0.901  | 1.518  |
| Cytoplasmic protein NCK1 OS=Mus musculus GN=Nck1 PE=1 SV=1                                    | 1.000 | 3.675 | 2.337 | 16.973 | 15.121 | 12.875 |
| Mammalian endydymn-related protein 1 OS=Mus musculus GN=Epdrr1 PE=1 SV=1                      | 1.000 | 1.165 | 1.082 | 0.906  | 0.940  | 1.165  |
| Nuclear autoantigenic sperm protein OS=Mus musculus GN=Nasp PE=1 SV=2                         | 1.000 | 0.888 | 0.944 | 0.848  | 1.239  | 0.999  |

|                                                                                                     |       |       |       |       |       |       |
|-----------------------------------------------------------------------------------------------------|-------|-------|-------|-------|-------|-------|
| Lysine--tRNA ligase OS=Mus musculus GN=Kars<br>PE=1 SV=1                                            | 1.075 | 1.077 | 1.076 | 1.677 | 1.499 | 1.526 |
| Serrate RNA effector molecule homolog OS=Mus<br>musculus GN=Srrt PE=1 SV=1                          | 0.883 | 0.991 | 0.937 | 1.106 | 0.754 | 1.083 |
| Tudor domain-containing protein 1 OS=Mus<br>musculus GN=Tdrd1 PE=1 SV=2                             | 1.000 | 0.858 | 0.929 | 1.058 | 1.746 | 1.232 |
| Splicing factor 3B subunit 1 OS=Mus musculus<br>GN=Sf3b1 PE=1 SV=1                                  | 1.000 | 0.988 | 0.994 | 1.115 | 0.914 | 1.304 |
| Reticulon-4 OS=Mus musculus GN=Rtn4 PE=1<br>SV=2                                                    | 1.000 | 1.010 | 1.005 | 0.932 | 1.077 | 1.089 |
| Transmembrane glycoprotein NMB OS=Mus<br>musculus GN=Gpmb PE=1 SV=2                                 | 1.000 | 1.082 | 1.041 | 0.766 | 0.875 | 0.848 |
| Opioid growth factor receptor OS=Mus musculus<br>GN=Ogfr PE=1 SV=1                                  | 1.000 | 1.091 | 1.046 | 1.385 | 1.252 | 1.365 |
| Ribosome-binding protein 1 OS=Mus musculus<br>GN=Rrbp1 PE=1 SV=2                                    | 0.899 | 0.897 | 0.898 | 0.759 | 0.694 | 0.864 |
| Rho GDP-dissociation inhibitor 1 OS=Mus<br>musculus GN=Arhgdia PE=1 SV=3                            | 1.119 | 1.117 | 1.118 | 1.535 | 1.619 | 1.373 |
| Pre-mRNA-processing-splicing factor 8 OS=Mus<br>musculus GN=Prpf8 PE=1 SV=2                         | 1.000 | 1.080 | 1.040 | 1.305 | 1.037 | 0.659 |
| 60S ribosomal protein L17 OS=Mus musculus<br>GN=Rpl17 PE=1 SV=3                                     | 1.000 | 1.028 | 1.014 | 1.668 | 1.860 | 1.469 |
| Lactoylglutathione lyase OS=Mus musculus<br>GN=Glo1 PE=1 SV=3                                       | 1.067 | 1.086 | 1.077 | 2.242 | 2.939 | 2.106 |
| Glyoxalase domain-containing protein 4 OS=Mus<br>musculus GN=Glod4 PE=1 SV=1                        | 1.000 | 0.993 | 0.997 | 1.147 | 1.137 | 1.127 |
| Actin-related protein 2/3 complex subunit 5<br>OS=Mus musculus GN=Arpc5 PE=1 SV=3                   | 0.920 | 0.845 | 0.882 | 1.058 | 0.847 | 0.923 |
| Cytosol aminopeptidase OS=Mus musculus<br>GN=Lap3 PE=1 SV=3                                         | 0.965 | 1.015 | 0.990 | 2.030 | 2.245 | 1.989 |
| Ribonuclease T2 OS=Mus musculus GN=Rnaset2<br>PE=1 SV=1                                             | 0.916 | 0.888 | 0.902 | 0.917 | 0.694 | 1.065 |
| Myosin regulatory light polypeptide 9 OS=Mus<br>musculus GN=Myl9 PE=1 SV=3                          | 1.011 | 0.975 | 0.993 | 1.107 | 1.509 | 0.953 |
| Neudesin OS=Mus musculus GN=Nenf PE=1 SV=1                                                          | 1.000 | 1.006 | 1.003 | 1.003 | 0.675 | 0.882 |
| 6-phosphogluconolactonase OS=Mus musculus<br>GN=Pgl3 PE=1 SV=1                                      | 1.249 | 1.334 | 1.292 | 2.864 | 2.601 | 2.927 |
| S-methyl-5'-thioadenosine phosphorylase OS=Mus<br>musculus GN=Mtap PE=1 SV=1                        | 1.081 | 0.922 | 1.001 | 1.023 | 1.037 | 1.252 |
| Thioredoxin domain-containing protein 9 OS=Mus<br>musculus GN=Txndc9 PE=1 SV=1                      | 1.000 | 0.991 | 0.996 | 1.275 | 1.592 | 1.466 |
| Protein CutA OS=Mus musculus GN=Cuta PE=1<br>SV=3                                                   | 1.000 | 0.768 | 0.884 | 0.560 | 0.543 | 0.623 |
| UPF0568 protein C14orf166 homolog OS=Mus<br>musculus PE=1 SV=1                                      | 0.933 | 0.924 | 0.928 | 1.366 | 1.361 | 1.404 |
| Cleavage and polyadenylation specificity factor<br>subunit 5 OS=Mus musculus GN=Nudt21 PE=1<br>SV=1 | 1.000 | 0.944 | 0.972 | 2.715 | 2.067 | 2.602 |
| Glia maturation factor beta OS=Mus musculus<br>GN=Gmfb PE=1 SV=3                                    | 1.145 | 0.953 | 1.049 | 1.172 | 1.529 | 1.019 |
| Coactosin-like protein OS=Mus musculus GN=Cotl1<br>PE=1 SV=3                                        | 1.000 | 0.950 | 0.975 | 0.577 | 0.886 | 0.839 |
| Density-regulated protein OS=Mus musculus<br>GN=Denr PE=1 SV=1                                      | 1.062 | 0.982 | 1.022 | 1.392 | 1.748 | 1.298 |
| RWD domain-containing protein 1 OS=Mus<br>musculus GN=Rwdd1 PE=1 SV=1                               | 1.000 | 0.717 | 0.858 | 0.588 | 0.984 | 0.882 |
| Thioredoxin domain-containing protein 17<br>OS=Mus musculus GN=Txndc17 PE=1 SV=1                    | 0.911 | 0.859 | 0.885 | 1.046 | 1.127 | 0.993 |
| Glutaredoxin-3 OS=Mus musculus GN=Glr3 PE=1<br>SV=1                                                 | 1.014 | 0.958 | 0.986 | 1.464 | 1.365 | 1.316 |
| 40S ribosomal protein S21 OS=Mus musculus                                                           | 0.976 | 1.004 | 0.990 | 1.444 | 1.528 | 1.358 |

|                                                                                             |       |       |       |       |       |       |
|---------------------------------------------------------------------------------------------|-------|-------|-------|-------|-------|-------|
| GN=Rps21 PE=1 SV=1                                                                          |       |       |       |       |       |       |
| Methylthioribose-1-phosphate isomerase OS=Mus musculus GN=Mri1 PE=1 SV=1                    | 1.000 | 0.944 | 0.972 | 0.768 | 0.800 | 1.159 |
| Thioredoxin domain-containing protein 12 OS=Mus musculus GN=Txndc12 PE=1 SV=1               | 1.000 | 0.841 | 0.920 | 0.671 | 0.784 | 0.658 |
| Microtubule-associated proteins 1A/1B light chain 3B OS=Mus musculus GN=Map1lc3b PE=1 SV=3  | 1.000 | 0.882 | 0.941 | 1.716 | 2.482 | 2.187 |
| 14-3-3 protein beta/alpha OS=Mus musculus GN=Ywhab PE=1 SV=3                                | 1.079 | 1.092 | 1.086 | 1.182 | 1.287 | 1.356 |
| Synaptobrevin homolog YKT6 OS=Mus musculus GN=Ykt6 PE=1 SV=1                                | 1.000 | 1.484 | 1.242 | 1.493 | 1.085 | 1.736 |
| Heat shock factor-binding protein 1 OS=Mus musculus GN=Hsbp1 PE=1 SV=1                      | 1.000 | 0.833 | 0.916 | 1.027 | 1.226 | 1.084 |
| 26S proteasome non-ATPase regulatory subunit 9 OS=Mus musculus GN=Psmc9 PE=1 SV=1           | 1.000 | 1.106 | 1.053 | 1.332 | 1.450 | 1.803 |
| Peptidyl-prolyl cis-trans isomerase D OS=Mus musculus GN=Ppid PE=1 SV=3                     | 1.000 | 0.953 | 0.976 | 1.485 | 1.746 | 1.450 |
| Acyl carrier protein, mitochondrial OS=Mus musculus GN=Ndufab1 PE=1 SV=1                    | 1.000 | 0.978 | 0.989 | 0.371 | 0.466 | 0.014 |
| WD repeat domain phosphoinositide-interacting protein 3 OS=Mus musculus GN=Wdr45b PE=1 SV=2 | 1.000 | 0.806 | 0.903 | 1.061 | 1.015 | 1.934 |
| Huntingtin-interacting protein K OS=Mus musculus GN=Hypk PE=1 SV=2                          | 1.000 | 1.001 | 1.000 | 0.996 | 1.646 | 0.922 |
| V-type proton ATPase subunit G 1 OS=Mus musculus GN=Atp6v1g1 PE=1 SV=3                      | 1.000 | 1.131 | 1.066 | 0.928 | 0.983 | 1.416 |
| H/ACA ribonucleoprotein complex subunit 2 OS=Mus musculus GN=Nhp2 PE=1 SV=1                 | 1.004 | 0.984 | 0.994 | 0.802 | 0.809 | 1.096 |
| SNW domain-containing protein 1 OS=Mus musculus GN=Snw1 PE=1 SV=3                           | 1.000 | 1.087 | 1.044 | 0.817 | 0.678 | 0.638 |
| Ran-binding protein 3 OS=Mus musculus GN=Ranbp3 PE=1 SV=2                                   | 1.000 | 0.940 | 0.970 | 0.654 | 0.661 | 0.724 |
| Structural maintenance of chromosomes protein 1A OS=Mus musculus GN=Smc1a PE=1 SV=4         | 1.000 | 1.065 | 1.033 | 1.276 | 1.012 | 1.169 |
| Actin-related protein 2/3 complex subunit 2 OS=Mus musculus GN=Arpc2 PE=1 SV=3              | 1.000 | 1.061 | 1.030 | 1.074 | 1.183 | 1.371 |
| Structural maintenance of chromosomes protein 3 OS=Mus musculus GN=Smc3 PE=1 SV=2           | 1.000 | 0.862 | 0.931 | 0.669 | 0.573 | 0.720 |
| Ribonucleoprotein PTB-binding 1 OS=Mus musculus GN=Raver1 PE=1 SV=2                         | 1.000 | 0.910 | 0.955 | 0.386 | 0.415 | 0.541 |
| Bifunctional purine biosynthesis protein PURH OS=Mus musculus GN=Atic PE=1 SV=2             | 0.987 | 1.001 | 0.994 | 1.430 | 1.549 | 1.540 |
| Sorting nexin-2 OS=Mus musculus GN=Snx2 PE=1 SV=2                                           | 1.000 | 0.827 | 0.913 | 1.774 | 1.549 | 2.069 |
| Beta-catenin-like protein 1 OS=Mus musculus GN=Ctnnbl1 PE=1 SV=1                            | 1.000 | 0.979 | 0.989 | 0.916 | 1.309 | 1.273 |
| N(G),N(G)-dimethylarginine dimethylaminohydrolase 1 OS=Mus musculus GN=Ddah1 PE=1 SV=3      | 0.875 | 0.814 | 0.844 | 0.902 | 1.068 | 1.038 |
| Peptidyl-prolyl cis-trans isomerase NIMA-interacting 4 OS=Mus musculus GN=Pin4 PE=1 SV=1    | 0.956 | 0.938 | 0.947 | 1.930 | 2.307 | 2.158 |
| RNA-binding protein 8A OS=Mus musculus GN=Rbm8a PE=1 SV=3                                   | 1.008 | 0.944 | 0.976 | 1.388 | 1.431 | 1.148 |
| Zinc finger CCHC domain-containing protein 10 OS=Mus musculus GN=Zcchc10 PE=2 SV=1          | 1.000 | 1.034 | 1.017 | 1.438 | 0.906 | 1.605 |
| 26S proteasome non-ATPase regulatory subunit 8 OS=Mus musculus GN=Psmc8 PE=1 SV=2           | 1.000 | 0.952 | 0.976 | 1.187 | 0.943 | 1.518 |
| Protein LBH OS=Mus musculus GN=Lbh PE=1 SV=1                                                | 1.000 | 0.887 | 0.944 | 1.135 | 0.744 | 0.836 |
| Mesencephalic astrocyte-derived neurotrophic factor OS=Mus musculus GN=Manf PE=1 SV=1       | 1.006 | 1.064 | 1.035 | 1.065 | 1.046 | 1.033 |

|                                                                                                          |       |       |       |       |       |       |
|----------------------------------------------------------------------------------------------------------|-------|-------|-------|-------|-------|-------|
| Calcyclin-binding protein OS=Mus musculus<br>GN=Cacybp PE=1 SV=1                                         | 1.029 | 1.056 | 1.042 | 1.641 | 2.046 | 1.696 |
| Interleukin enhancer-binding factor 2 OS=Mus<br>musculus GN=Ilf2 PE=1 SV=1                               | 0.885 | 0.884 | 0.884 | 1.404 | 1.490 | 1.405 |
| Probable tRNA(His) guanylyltransferase OS=Mus<br>musculus GN=Thg11 PE=1 SV=1                             | 1.000 | 2.161 | 1.581 | 1.782 | 0.798 | 1.068 |
| Plasminogen activator inhibitor 1 RNA-binding<br>protein OS=Mus musculus GN=Serbp1 PE=1 SV=2             | 1.111 | 1.051 | 1.081 | 1.753 | 2.126 | 1.594 |
| Cartilage-associated protein OS=Mus musculus<br>GN=Crtap PE=1 SV=3                                       | 1.000 | 0.784 | 0.892 | 0.536 | 0.549 | 0.524 |
| Putative RNA-binding protein Luc7-like 1 OS=Mus<br>musculus GN=Luc7l PE=1 SV=2                           | 1.000 | 1.113 | 1.056 | 0.758 | 0.669 | 0.794 |
| Renin receptor OS=Mus musculus GN=Atp6ap2<br>PE=1 SV=2                                                   | 1.000 | 0.955 | 0.978 | 0.945 | 1.060 | 1.071 |
| Phosphoacetylglucosamine mutase OS=Mus<br>musculus GN=Pgm3 PE=1 SV=1                                     | 1.001 | 0.969 | 0.985 | 0.923 | 1.218 | 1.089 |
| Tumor protein D54 OS=Mus musculus<br>GN=Tpd52l2 PE=1 SV=1                                                | 1.073 | 1.010 | 1.042 | 1.141 | 0.971 | 1.347 |
| COP9 signalosome complex subunit 7a OS=Mus<br>musculus GN=Cops7a PE=1 SV=2                               | 1.000 | 0.908 | 0.954 | 0.961 | 0.989 | 1.059 |
| Obg-like ATPase 1 OS=Mus musculus GN=Ola1<br>PE=1 SV=1                                                   | 1.000 | 1.134 | 1.067 | 1.666 | 1.314 | 1.578 |
| NSFL1 cofactor p47 OS=Mus musculus GN=Nsf1c<br>PE=1 SV=1                                                 | 0.895 | 0.913 | 0.904 | 0.952 | 0.939 | 0.902 |
| Glycine--tRNA ligase OS=Mus musculus GN=Gars<br>PE=1 SV=1                                                | 1.000 | 0.946 | 0.973 | 1.182 | 1.275 | 1.230 |
| Vasorin OS=Mus musculus GN=Vasn PE=2 SV=2                                                                | 1.000 | 0.738 | 0.869 | 0.302 | 0.403 | 0.422 |
| Superkiller viralicidic activity 2-like 2 OS=Mus<br>musculus GN=Skiv2l2 PE=1 SV=1                        | 1.000 | 0.949 | 0.974 | 1.067 | 0.956 | 1.162 |
| Citrate synthase, mitochondrial OS=Mus musculus<br>GN=Cs PE=1 SV=1                                       | 1.000 | 1.023 | 1.011 | 1.198 | 1.177 | 1.201 |
| 40S ribosomal protein S19 OS=Mus musculus<br>GN=Rps19 PE=1 SV=3                                          | 1.000 | 0.854 | 0.927 | 1.051 | 1.650 | 1.128 |
| Ubiquitin-conjugating enzyme E2 variant 1<br>OS=Mus musculus GN=Ube2v1 PE=1 SV=1                         | 1.026 | 1.063 | 1.045 | 1.365 | 1.529 | 1.380 |
| Protein PBDC1 OS=Mus musculus GN=Pbdc1 PE=1<br>SV=1                                                      | 1.000 | 0.959 | 0.980 | 0.740 | 1.584 | 0.726 |
| Heterogeneous nuclear ribonucleoprotein M<br>OS=Mus musculus GN=Hnrnpm PE=1 SV=3                         | 1.000 | 0.960 | 0.980 | 0.426 | 0.679 | 0.938 |
| Phosphoglucosyltransferase-1 OS=Mus musculus<br>GN=Pgm1 PE=1 SV=4                                        | 0.887 | 0.982 | 0.935 | 1.214 | 1.308 | 1.175 |
| Arginine--tRNA ligase, cytoplasmic OS=Mus<br>musculus GN=Rars PE=1 SV=2                                  | 0.959 | 0.961 | 0.960 | 1.146 | 1.234 | 1.249 |
| Parathyromosin OS=Mus musculus GN=Ptms PE=1<br>SV=3                                                      | 1.114 | 1.080 | 1.097 | 1.129 | 1.218 | 1.309 |
| Succinyl-CoA:3-ketoacid coenzyme A transferase<br>1, mitochondrial OS=Mus musculus GN=Oxct1<br>PE=1 SV=1 | 1.000 | 1.368 | 1.184 | 1.475 | 0.737 | 0.824 |
| Phosphoribosyl pyrophosphate synthase-<br>associated protein 1 OS=Mus musculus<br>GN=Prpsap1 PE=1 SV=1   | 1.000 | 1.300 | 1.150 | 1.126 | 1.402 | 2.284 |
| Dynein light chain 2, cytoplasmic OS=Mus<br>musculus GN=Dynll2 PE=1 SV=1                                 | 1.011 | 1.056 | 1.034 | 2.349 | 2.873 | 2.231 |
| Threonine--tRNA ligase, cytoplasmic OS=Mus<br>musculus GN=Tars PE=1 SV=2                                 | 1.056 | 1.037 | 1.046 | 1.201 | 1.431 | 1.284 |
| Protein LSM12 homolog OS=Mus musculus<br>GN=Lsm12 PE=1 SV=1                                              | 1.000 | 0.906 | 0.953 | 0.796 | 0.818 | 0.857 |
| NHP2-like protein 1 OS=Mus musculus GN=Snu13<br>PE=1 SV=4                                                | 1.000 | 0.706 | 0.853 | 0.654 | 0.789 | 0.555 |
| Peptidyl-prolyl cis-trans isomerase-like 1 OS=Mus<br>musculus GN=Ppil1 PE=1 SV=1                         | 1.000 | 1.027 | 1.014 | 1.137 | 0.962 | 1.019 |



|                                                                                                                |       |       |       |       |       |       |
|----------------------------------------------------------------------------------------------------------------|-------|-------|-------|-------|-------|-------|
| Leukocyte elastase inhibitor A OS=Mus musculus<br>GN=Serp1b1a PE=1 SV=1                                        | 1.000 | 1.123 | 1.062 | 0.952 | 0.800 | 1.044 |
| ES1 protein homolog, mitochondrial OS=Mus<br>musculus GN=D10Jhu81e PE=1 SV=1                                   | 1.000 | 1.029 | 1.015 | 1.746 | 1.075 | 1.752 |
| Cytosolic non-specific dipeptidase OS=Mus<br>musculus GN=Cndp2 PE=1 SV=1                                       | 1.025 | 1.146 | 1.085 | 1.351 | 1.382 | 1.325 |
| Tubulin-folding cofactor B OS=Mus musculus<br>GN=Tbcb PE=1 SV=2                                                | 1.000 | 0.888 | 0.944 | 0.860 | 0.760 | 1.095 |
| Proline-rich AKT1 substrate 1 OS=Mus musculus<br>GN=Akt1s1 PE=1 SV=1                                           | 1.000 | 0.885 | 0.943 | 0.534 | 0.970 | 0.720 |
| Golgi to ER traffic protein 4 homolog OS=Mus<br>musculus GN=Get4 PE=1 SV=2                                     | 1.000 | 0.828 | 0.914 | 0.842 | 0.816 | 0.720 |
| Protein SEC13 homolog OS=Mus musculus<br>GN=Sec13 PE=1 SV=3                                                    | 1.000 | 1.114 | 1.057 | 0.675 | 0.763 | 0.679 |
| Cysteine and histidine-rich domain-containing<br>protein 1 OS=Mus musculus GN=Chordc1 PE=1<br>SV=1             | 0.985 | 0.996 | 0.990 | 1.184 | 1.282 | 1.323 |
| Endoplasmic reticulum resident protein 44<br>OS=Mus musculus GN=Erp44 PE=1 SV=1                                | 1.045 | 0.888 | 0.966 | 0.626 | 0.583 | 0.626 |
| Pre-mRNA-splicing factor SPF27 OS=Mus<br>musculus GN=Bcas2 PE=1 SV=1                                           | 1.000 | 1.089 | 1.044 | 1.948 | 1.167 | 2.059 |
| Polypeptide N-acetylgalactosaminyltransferase 15<br>OS=Mus musculus GN=Galnt15 PE=2 SV=1                       | 1.000 | 1.256 | 1.128 | 1.581 | 0.798 | 1.389 |
| Ubiquitin-related modifier 1 OS=Mus musculus<br>GN=Urm1 PE=1 SV=1                                              | 1.000 | 0.936 | 0.968 | 0.947 | 0.801 | 1.117 |
| Low molecular weight phosphotyrosine protein<br>phosphatase OS=Mus musculus GN=Acp1 PE=1<br>SV=3               | 1.060 | 1.448 | 1.254 | 1.837 | 1.822 | 1.748 |
| Splicing factor 3A subunit 3 OS=Mus musculus<br>GN=Sf3a3 PE=1 SV=2                                             | 1.000 | 0.884 | 0.942 | 1.005 | 1.035 | 1.108 |
| Cullin-5 OS=Mus musculus GN=Cul5 PE=1 SV=3                                                                     | 1.000 | 1.085 | 1.043 | 1.230 | 1.210 | 1.430 |
| Protein transport protein Sec23B OS=Mus<br>musculus GN=Sec23b PE=1 SV=1                                        | 1.023 | 1.556 | 1.290 | 1.675 | 1.522 | 1.240 |
| Carbonic anhydrase 13 OS=Mus musculus<br>GN=Ca13 PE=1 SV=1                                                     | 1.000 | 0.928 | 0.964 | 3.899 | 4.682 | 2.342 |
| Dr1-associated corepressor OS=Mus musculus<br>GN=Drp1 PE=1 SV=3                                                | 1.000 | 1.244 | 1.122 | 1.149 | 0.900 | 1.517 |
| Polyadenylate-binding protein-interacting protein<br>2 OS=Mus musculus GN=Paip2 PE=1 SV=1                      | 1.000 | 0.743 | 0.871 | 0.615 | 0.572 | 0.680 |
| Oxidative stress-responsive serine-rich protein 1<br>OS=Mus musculus GN=Oser1 PE=2 SV=1                        | 1.000 | 1.167 | 1.083 | 1.054 | 1.058 | 0.548 |
| Exosome complex component RRP43 OS=Mus<br>musculus GN=Exosc8 PE=1 SV=1                                         | 1.000 | 0.961 | 0.981 | 1.230 | 1.058 | 1.286 |
| Ribose-phosphate pyrophosphokinase 1 OS=Mus<br>musculus GN=Prps1 PE=1 SV=4                                     | 1.000 | 0.961 | 0.981 | 0.864 | 0.702 | 0.894 |
| Protein shisa-5 OS=Mus musculus GN=Shisa5 PE=1<br>SV=1                                                         | 1.000 | 0.996 | 0.998 | 0.860 | 0.683 | 0.825 |
| DNA-directed RNA polymerase II subunit RPB4<br>OS=Mus musculus GN=Polr2d PE=1 SV=2                             | 1.000 | 1.247 | 1.124 | 1.209 | 1.314 | 1.867 |
| LysM and putative peptidoglycan-binding domain-<br>containing protein 2 OS=Mus musculus<br>GN=Lysmd2 PE=1 SV=2 | 1.000 | 0.772 | 0.886 | 0.440 | 0.722 | 0.450 |
| Nucleolar protein 7 OS=Mus musculus GN=Nol7<br>PE=1 SV=1                                                       | 1.000 | 0.959 | 0.980 | 2.070 | 1.972 | 1.936 |
| Inorganic pyrophosphatase OS=Mus musculus<br>GN=Ppa1 PE=1 SV=1                                                 | 1.015 | 1.008 | 1.011 | 1.250 | 1.805 | 1.400 |
| 60S ribosomal protein L37 OS=Mus musculus<br>GN=Rpl37 PE=3 SV=3                                                | 1.000 | 1.000 | 1.000 | 1.000 | 1.680 | 1.974 |
| DnaJ homolog subfamily B member 4 OS=Mus<br>musculus GN=Dnajb4 PE=1 SV=1                                       | 1.000 | 0.939 | 0.970 | 0.980 | 0.915 | 0.883 |
| DnaJ homolog subfamily C member 4 OS=Mus                                                                       | 1.000 | 1.211 | 1.105 | 1.156 | 0.981 | 1.305 |

|                                                                                                              |       |       |       |       |       |       |
|--------------------------------------------------------------------------------------------------------------|-------|-------|-------|-------|-------|-------|
| <b>musculus GN=Dnajc4 PE=2 SV=2</b>                                                                          |       |       |       |       |       |       |
| <b>Inosine triphosphate pyrophosphatase OS=Mus musculus GN=Itpa PE=1 SV=2</b>                                | 1.131 | 1.008 | 1.070 | 1.288 | 1.293 | 1.258 |
| <b>Charged multivesicular body protein 4b OS=Mus musculus GN=Chmp4b PE=1 SV=2</b>                            | 1.000 | 0.796 | 0.898 | 0.520 | 0.524 | 0.794 |
| <b>Elongation factor 1-gamma OS=Mus musculus GN=Eef1g PE=1 SV=3</b>                                          | 1.009 | 1.055 | 1.032 | 1.393 | 1.671 | 1.481 |
| <b>Oligoribonuclease, mitochondrial OS=Mus musculus GN=Rexo2 PE=1 SV=2</b>                                   | 0.966 | 0.963 | 0.965 | 0.947 | 0.965 | 1.020 |
| <b>Bola-like protein 1 OS=Mus musculus GN=Bola1 PE=1 SV=1</b>                                                | 0.963 | 1.077 | 1.020 | 0.747 | 0.664 | 0.824 |
| <b>Sorting nexin-5 OS=Mus musculus GN=Snx5 PE=1 SV=1</b>                                                     | 1.000 | 1.723 | 1.362 | 2.073 | 1.755 | 1.661 |
| <b>26S proteasome non-ATPase regulatory subunit 12 OS=Mus musculus GN=Psm12 PE=1 SV=4</b>                    | 1.094 | 1.071 | 1.083 | 1.212 | 1.410 | 1.138 |
| <b>Coiled-coil domain-containing protein 124 OS=Mus musculus GN=Ccdc124 PE=1 SV=1</b>                        | 1.008 | 1.158 | 1.083 | 2.486 | 2.693 | 2.863 |
| <b>EF-hand domain-containing protein D2 OS=Mus musculus GN=Efh2 PE=1 SV=1</b>                                | 1.000 | 1.073 | 1.036 | 1.160 | 1.445 | 1.022 |
| <b>Magnesium-dependent phosphatase 1 OS=Mus musculus GN=Mdp1 PE=1 SV=1</b>                                   | 0.808 | 0.755 | 0.781 | 1.158 | 0.917 | 0.813 |
| <b>m7GpppX diphosphatase OS=Mus musculus GN=Dcps PE=1 SV=1</b>                                               | 1.000 | 0.924 | 0.962 | 1.266 | 1.408 | 1.320 |
| <b>Guanine nucleotide-binding protein G(I)/G(S)/G(O) subunit gamma-12 OS=Mus musculus GN=Gng12 PE=1 SV=3</b> | 1.000 | 0.809 | 0.904 | 0.496 | 0.688 | 0.471 |
| <b>U4/U6 small nuclear ribonucleoprotein Prp4 OS=Mus musculus GN=Prpf4 PE=1 SV=1</b>                         | 1.000 | 0.960 | 0.980 | 1.025 | 1.149 | 0.805 |
| <b>Calponin-3 OS=Mus musculus GN=Cnn3 PE=1 SV=1</b>                                                          | 1.000 | 1.056 | 1.028 | 1.236 | 1.030 | 1.242 |
| <b>39S ribosomal protein L12, mitochondrial OS=Mus musculus GN=Mrpl12 PE=1 SV=2</b>                          | 1.000 | 1.017 | 1.008 | 1.559 | 1.016 | 1.561 |
| <b>cAMP-dependent protein kinase type I-alpha regulatory subunit OS=Mus musculus GN=Prkar1a PE=1 SV=3</b>    | 1.000 | 1.276 | 1.138 | 1.134 | 1.154 | 0.956 |
| <b>Alpha-aminoadipic semialdehyde dehydrogenase OS=Mus musculus GN=Aldh7a1 PE=1 SV=4</b>                     | 1.000 | 0.803 | 0.902 | 0.703 | 0.488 | 0.756 |
| <b>AP-2 complex subunit beta OS=Mus musculus GN=Ap2b1 PE=1 SV=1</b>                                          | 1.055 | 1.000 | 1.027 | 1.045 | 1.053 | 1.243 |
| <b>Perilipin-3 OS=Mus musculus GN=Plin3 PE=1 SV=1</b>                                                        | 1.016 | 1.073 | 1.044 | 0.955 | 0.874 | 0.972 |
| <b>Tax1-binding protein 3 OS=Mus musculus GN=Tax1bp3 PE=1 SV=1</b>                                           | 1.000 | 0.856 | 0.928 | 0.629 | 0.490 | 0.777 |
| <b>Phosphoglycerate mutase 1 OS=Mus musculus GN=Pgam1 PE=1 SV=3</b>                                          | 1.080 | 1.085 | 1.083 | 2.116 | 2.726 | 1.920 |
| <b>UMP-CMP kinase OS=Mus musculus GN=Cmpk1 PE=1 SV=1</b>                                                     | 0.996 | 1.066 | 1.031 | 0.958 | 1.246 | 1.225 |
| <b>Protein-associating with the carboxyl-terminal domain of ezrin OS=Mus musculus GN=Scyl3 PE=1 SV=3</b>     | 1.000 | 1.366 | 1.183 | 1.337 | 2.028 | 1.382 |
| <b>5'-3' exoribonuclease 2 OS=Mus musculus GN=Xrn2 PE=1 SV=1</b>                                             | 1.020 | 1.804 | 1.412 | 2.409 | 1.536 | 2.118 |
| <b>Protein phosphatase 1 regulatory subunit 12A OS=Mus musculus GN=Ppp1r12a PE=1 SV=2</b>                    | 1.000 | 0.998 | 0.999 | 0.962 | 0.914 | 1.043 |
| <b>Eukaryotic translation initiation factor 3 subunit K OS=Mus musculus GN=Elf3k PE=1 SV=1</b>               | 1.057 | 1.019 | 1.038 | 0.796 | 0.863 | 0.885 |
| <b>Pyrroline-5-carboxylate reductase 3 OS=Mus musculus GN=Pycrl PE=1 SV=2</b>                                | 1.000 | 0.862 | 0.931 | 2.280 | 1.215 | 1.697 |
| <b>Mitochondrial import receptor subunit TOM20 homolog OS=Mus musculus GN=Tomm20 PE=1 SV=1</b>               | 1.000 | 1.065 | 1.032 | 0.821 | 0.998 | 0.921 |
| <b>6-phosphogluconate dehydrogenase, decarboxylating OS=Mus musculus GN=Pgd PE=1</b>                         | 1.030 | 0.981 | 1.005 | 1.247 | 1.263 | 1.222 |

|                                                                                                           |       |       |       |        |       |        |
|-----------------------------------------------------------------------------------------------------------|-------|-------|-------|--------|-------|--------|
| <b>SV=3</b>                                                                                               |       |       |       |        |       |        |
| <b>Multifunctional methyltransferase subunit TRM112-like protein OS=Mus musculus GN=Trmt112 PE=1 SV=1</b> | 1.000 | 0.914 | 0.957 | 1.211  | 0.870 | 1.355  |
| <b>Eukaryotic translation initiation factor 3 subunit F OS=Mus musculus GN=Eif3f PE=1 SV=2</b>            | 1.086 | 0.960 | 1.023 | 0.921  | 0.946 | 0.823  |
| <b>Multifunctional protein ADE2 OS=Mus musculus GN=Paics PE=1 SV=4</b>                                    | 1.038 | 0.927 | 0.983 | 1.000  | 1.160 | 1.065  |
| <b>NADH-cytochrome b5 reductase 3 OS=Mus musculus GN=Cyb5r3 PE=1 SV=3</b>                                 | 1.000 | 0.689 | 0.844 | 0.542  | 0.564 | 0.417  |
| <b>Cysteine-rich protein 2 OS=Mus musculus GN=Crip2 PE=1 SV=1</b>                                         | 1.000 | 1.257 | 1.128 | 0.675  | 0.569 | 0.677  |
| <b>Electron transfer flavoprotein subunit beta OS=Mus musculus GN=Etfb PE=1 SV=3</b>                      | 1.000 | 0.752 | 0.876 | 0.417  | 0.430 | 0.588  |
| <b>Retinoic acid receptor responder protein 2 OS=Mus musculus GN=Rarres2 PE=1 SV=1</b>                    | 1.000 | 1.052 | 1.026 | 1.048  | 1.264 | 1.171  |
| <b>D-tyrosyl-tRNA(Tyr) deacylase 1 OS=Mus musculus GN=Dtd1 PE=1 SV=2</b>                                  | 1.000 | 0.843 | 0.922 | 1.641  | 0.945 | 0.885  |
| <b>Twisted gastrulation protein homolog 1 OS=Mus musculus GN=Twsg1 PE=1 SV=1</b>                          | 1.000 | 0.845 | 0.923 | 0.581  | 0.621 | 0.846  |
| <b>Ankycorbin OS=Mus musculus GN=Rai14 PE=1 SV=1</b>                                                      | 1.000 | 0.896 | 0.948 | 0.710  | 0.929 | 1.074  |
| <b>Alpha-parvin OS=Mus musculus GN=Parva PE=1 SV=1</b>                                                    | 1.000 | 0.888 | 0.944 | 1.150  | 0.982 | 0.994  |
| <b>Calsyntenin-1 OS=Mus musculus GN=Clstn1 PE=1 SV=1</b>                                                  | 1.013 | 0.961 | 0.987 | 0.641  | 0.634 | 0.712  |
| <b>Importin-7 OS=Mus musculus GN=Ipo7 PE=1 SV=2</b>                                                       | 1.058 | 1.029 | 1.044 | 1.088  | 1.217 | 1.240  |
| <b>Regulator of nonsense transcripts 1 OS=Mus musculus GN=Upf1 PE=1 SV=2</b>                              | 1.000 | 0.927 | 0.964 | 1.250  | 1.127 | 0.969  |
| <b>Follistatin-related protein 3 OS=Mus musculus GN=Fstl3 PE=1 SV=1</b>                                   | 1.000 | 1.036 | 1.018 | 0.771  | 0.523 | 0.732  |
| <b>Vacuolar protein sorting-associated protein 35 OS=Mus musculus GN=Vps35 PE=1 SV=1</b>                  | 1.001 | 1.101 | 1.051 | 1.255  | 1.245 | 1.521  |
| <b>Major vault protein OS=Mus musculus GN=Mvp PE=1 SV=4</b>                                               | 1.000 | 1.104 | 1.052 | 0.706  | 0.688 | 0.888  |
| <b>Protein SET OS=Mus musculus GN=Set PE=1 SV=1</b>                                                       | 1.045 | 0.924 | 0.985 | 1.959  | 2.334 | 1.892  |
| <b>Allograft inflammatory factor 1-like OS=Mus musculus GN=Aif1l PE=1 SV=1</b>                            | 1.053 | 0.908 | 0.980 | 0.845  | 1.119 | 0.991  |
| <b>Syntaxin-12 OS=Mus musculus GN=Stx12 PE=1 SV=1</b>                                                     | 1.000 | 1.200 | 1.100 | 1.305  | 0.697 | 0.805  |
| <b>Brain-specific serine protease 4 OS=Mus musculus GN=Prss22 PE=2 SV=1</b>                               | 1.000 | 0.513 | 0.756 | 0.728  | 1.154 | 1.144  |
| <b>Cysteine--tRNA ligase, cytoplasmic OS=Mus musculus GN=Cars PE=1 SV=2</b>                               | 0.865 | 0.930 | 0.898 | 1.183  | 1.144 | 1.218  |
| <b>LDLR chaperone MESD OS=Mus musculus GN=Mesdc2 PE=1 SV=1</b>                                            | 1.000 | 1.180 | 1.090 | 1.328  | 1.352 | 1.268  |
| <b>LIM domain and actin-binding protein 1 OS=Mus musculus GN=Lima1 PE=1 SV=3</b>                          | 1.003 | 1.005 | 1.004 | 1.374  | 1.515 | 1.496  |
| <b>Striatin-3 OS=Mus musculus GN=Strn3 PE=1 SV=1</b>                                                      | 1.000 | 0.819 | 0.910 | 0.915  | 0.898 | 1.117  |
| <b>Exportin-2 OS=Mus musculus GN=Cse1l PE=1 SV=1</b>                                                      | 1.035 | 0.959 | 0.997 | 1.342  | 1.481 | 1.207  |
| <b>15 kDa selenoprotein OS=Mus musculus GN=Sep15 PE=1 SV=3</b>                                            | 1.000 | 0.800 | 0.900 | 0.963  | 0.996 | 0.814  |
| <b>E3 SUMO-protein ligase RanBP2 OS=Mus musculus GN=Ranbp2 PE=1 SV=2</b>                                  | 0.049 | 3.002 | 1.525 | 12.646 | 9.754 | 13.326 |
| <b>Exostosin-like 2 OS=Mus musculus GN=Extl2 PE=1 SV=1</b>                                                | 1.000 | 1.153 | 1.076 | 0.843  | 0.914 | 0.743  |
| <b>H/ACA ribonucleoprotein complex subunit 4 OS=Mus musculus GN=Dkc1 PE=1 SV=4</b>                        | 1.120 | 0.944 | 1.032 | 1.053  | 1.342 | 0.980  |
| <b>Palladin OS=Mus musculus GN=Palld PE=1 SV=2</b>                                                        | 1.000 | 1.034 | 1.017 | 1.349  | 1.374 | 1.501  |
| <b>Matrix metalloproteinase-19 OS=Mus musculus GN=Mmp19 PE=2 SV=1</b>                                     | 1.000 | 1.024 | 1.012 | 0.904  | 1.192 | 1.417  |

|                                                                                                                |       |       |       |       |       |       |
|----------------------------------------------------------------------------------------------------------------|-------|-------|-------|-------|-------|-------|
| Tropomodulin-3 OS=Mus musculus GN=Tmod3<br>PE=1 SV=1                                                           | 1.037 | 1.308 | 1.173 | 1.507 | 1.470 | 1.740 |
| Insulin-degrading enzyme OS=Mus musculus<br>GN=Ide PE=1 SV=1                                                   | 1.000 | 1.045 | 1.023 | 1.091 | 1.209 | 1.092 |
| Ragulator complex protein LAMTOR2 OS=Mus<br>musculus GN=Lamtor2 PE=1 SV=1                                      | 1.000 | 1.909 | 1.454 | 0.639 | 2.969 | 4.472 |
| Cytoplasmic dynein 1 heavy chain 1 OS=Mus<br>musculus GN=Dync1h1 PE=1 SV=2                                     | 1.094 | 1.041 | 1.067 | 1.010 | 0.919 | 1.148 |
| Diphosphoinositol polyphosphate<br>phosphohydrolase 1 OS=Mus musculus GN=Nudt3<br>PE=1 SV=1                    | 1.000 | 0.889 | 0.945 | 0.949 | 0.822 | 0.923 |
| Ribosyldihydronicotinamide dehydrogenase<br>[quinone] OS=Mus musculus GN=Nqo2 PE=1 SV=3                        | 1.000 | 0.823 | 0.912 | 1.157 | 0.823 | 0.995 |
| Alpha-actinin-2 OS=Mus musculus GN=Actn2 PE=1<br>SV=2                                                          | 1.000 | 1.056 | 1.028 | 0.946 | 0.751 | 1.001 |
| Protein arginine N-methyltransferase 1 OS=Mus<br>musculus GN=Prmt1 PE=1 SV=1                                   | 1.000 | 1.017 | 1.008 | 1.300 | 1.706 | 1.199 |
| Coatomer subunit beta OS=Mus musculus<br>GN=Copb1 PE=1 SV=1                                                    | 0.945 | 1.024 | 0.984 | 1.165 | 1.499 | 1.185 |
| Alcohol dehydrogenase [NADP(+)] OS=Mus<br>musculus GN=Akr1a1 PE=1 SV=3                                         | 1.086 | 1.099 | 1.092 | 1.310 | 1.562 | 1.356 |
| Nucleolar RNA helicase 2 OS=Mus musculus<br>GN=Ddx21 PE=1 SV=3                                                 | 1.000 | 0.867 | 0.933 | 1.115 | 1.835 | 1.188 |
| Transcription and mRNA export factor ENY2<br>OS=Mus musculus GN=Eny2 PE=1 SV=1                                 | 1.031 | 0.828 | 0.930 | 0.769 | 0.987 | 0.792 |
| RILP-like protein 1 OS=Mus musculus GN=Rilpl1<br>PE=1 SV=1                                                     | 1.000 | 1.113 | 1.057 | 1.351 | 0.761 | 1.121 |
| Bifunctional lysine-specific demethylase and<br>histidyl-hydroxylase NO66 OS=Mus musculus<br>GN=No66 PE=1 SV=2 | 1.000 | 1.043 | 1.021 | 1.011 | 1.223 | 0.979 |
| Ribonuclease 4 OS=Mus musculus GN=Rnase4<br>PE=1 SV=1                                                          | 1.124 | 1.052 | 1.088 | 1.214 | 0.876 | 1.027 |
| Phosphorylated adapter RNA export protein<br>OS=Mus musculus GN=Phax PE=1 SV=1                                 | 1.000 | 0.828 | 0.914 | 0.907 | 0.705 | 1.346 |
| SH3 domain-binding glutamic acid-rich-like<br>protein OS=Mus musculus GN=Sh3bgrl PE=1 SV=1                     | 0.915 | 0.969 | 0.942 | 1.130 | 1.458 | 1.339 |
| Endophilin-B1 OS=Mus musculus GN=Sh3glb1<br>PE=1 SV=1                                                          | 1.000 | 0.773 | 0.887 | 0.323 | 0.312 | 0.280 |
| UPF0160 protein MYG1, mitochondrial OS=Mus<br>musculus GN=Myg1 PE=1 SV=1                                       | 1.000 | 1.151 | 1.076 | 1.322 | 1.926 | 1.705 |
| Ubiquitin carboxyl-terminal hydrolase isozyme L3<br>OS=Mus musculus GN=Uchl3 PE=1 SV=2                         | 0.972 | 1.130 | 1.051 | 3.560 | 3.783 | 3.106 |
| Ras GTPase-activating-like protein IQGAP1<br>OS=Mus musculus GN=Iqgap1 PE=1 SV=2                               | 1.081 | 1.105 | 1.093 | 1.282 | 1.239 | 1.274 |
| DNA polymerase epsilon subunit 3 OS=Mus<br>musculus GN=Pole3 PE=1 SV=1                                         | 1.000 | 0.737 | 0.869 | 0.446 | 0.426 | 0.848 |
| Hypoxia up-regulated protein 1 OS=Mus musculus<br>GN=Hyou1 PE=1 SV=1                                           | 1.074 | 1.060 | 1.067 | 0.981 | 0.866 | 1.120 |
| High mobility group nucleosome-binding domain-<br>containing protein 5 OS=Mus musculus<br>GN=Hmgn5 PE=1 SV=2   | 1.000 | 0.984 | 0.992 | 0.606 | 0.479 | 0.820 |
| MAGUK p55 subfamily member 6 OS=Mus<br>musculus GN=Mpp6 PE=1 SV=1                                              | 1.000 | 0.970 | 0.985 | 0.900 | 1.182 | 1.414 |
| Sacsin OS=Mus musculus GN=Sacs PE=1 SV=2                                                                       | 1.000 | 0.937 | 0.968 | 0.359 | 0.322 | 0.036 |
| BAG family molecular chaperone regulator 3<br>OS=Mus musculus GN=Bag3 PE=1 SV=2                                | 1.291 | 0.951 | 1.121 | 0.944 | 1.183 | 1.151 |
| Cullin-3 OS=Mus musculus GN=Cul3 PE=1 SV=1                                                                     | 1.000 | 1.051 | 1.025 | 0.739 | 0.843 | 0.807 |
| Actin-related protein 2/3 complex subunit 3<br>OS=Mus musculus GN=Arpc3 PE=1 SV=3                              | 1.000 | 0.894 | 0.947 | 1.045 | 0.932 | 0.855 |
| Ubiquitin carboxyl-terminal hydrolase 14 OS=Mus<br>musculus GN=Usp14 PE=1 SV=3                                 | 0.963 | 0.914 | 0.938 | 1.163 | 1.277 | 1.246 |

|                                                                                                       |       |       |       |       |       |       |
|-------------------------------------------------------------------------------------------------------|-------|-------|-------|-------|-------|-------|
| <b>BUB3-interacting and GLEBS motif-containing protein ZNF207 OS=Mus musculus GN=Znf207 PE=1 SV=1</b> | 0.933 | 0.854 | 0.894 | 0.999 | 0.897 | 1.043 |
| <b>Endothelial differentiation-related factor 1 OS=Mus musculus GN=Edf1 PE=1 SV=1</b>                 | 1.000 | 1.124 | 1.062 | 1.505 | 1.483 | 1.866 |
| <b>Thioredoxin reductase 1, cytoplasmic OS=Mus musculus GN=Txnrd1 PE=1 SV=3</b>                       | 0.937 | 1.000 | 0.968 | 1.397 | 1.412 | 1.282 |
| <b>Glutaredoxin-1 OS=Mus musculus GN=GlrX PE=1 SV=3</b>                                               | 1.000 | 1.140 | 1.070 | 1.523 | 1.601 | 1.585 |
| <b>Transforming protein RhoA OS=Mus musculus GN=Rhoa PE=1 SV=1</b>                                    | 1.030 | 1.044 | 1.037 | 1.092 | 1.018 | 1.058 |
| <b>Proteasome subunit alpha type-6 OS=Mus musculus GN=Psma6 PE=1 SV=1</b>                             | 1.090 | 0.991 | 1.041 | 1.183 | 1.603 | 1.190 |
| <b>Dickkopf-related protein 3 OS=Mus musculus GN=Dkk3 PE=2 SV=1</b>                                   | 0.908 | 0.887 | 0.898 | 0.475 | 0.476 | 0.562 |
| <b>Prolyl endopeptidase OS=Mus musculus GN=Prep PE=1 SV=1</b>                                         | 1.017 | 0.984 | 1.000 | 1.221 | 1.366 | 1.166 |
| <b>Peptidyl-prolyl cis-trans isomerase NIMA-interacting 1 OS=Mus musculus GN=Pin1 PE=1 SV=1</b>       | 1.000 | 0.856 | 0.928 | 1.207 | 1.484 | 1.097 |
| <b>Protein-tyrosine kinase 2-beta OS=Mus musculus GN=Ptk2b PE=1 SV=2</b>                              | 1.000 | 0.945 | 0.973 | 1.191 | 0.747 | 1.260 |
| <b>Alpha-N-acetylgalactosaminidase OS=Mus musculus GN=Naga PE=1 SV=2</b>                              | 1.000 | 1.145 | 1.073 | 1.764 | 0.998 | 1.289 |
| <b>Short transient receptor potential channel 5 OS=Mus musculus GN=Trpc5 PE=1 SV=2</b>                | 1.000 | 1.818 | 1.409 | 1.520 | 0.977 | 1.933 |
| <b>U6 snRNA-associated Sm-like protein LSm4 OS=Mus musculus GN=Lsm4 PE=1 SV=1</b>                     | 1.000 | 0.957 | 0.978 | 1.274 | 1.624 | 1.698 |
| <b>b(0,+)-type amino acid transporter 1 OS=Mus musculus GN=Slc7a9 PE=1 SV=1</b>                       | 1.000 | 0.955 | 0.977 | 0.833 | 0.590 | 0.586 |
| <b>LIM domain-containing protein 1 OS=Mus musculus GN=Limd1 PE=1 SV=2</b>                             | 1.000 | 0.716 | 0.858 | 0.576 | 0.780 | 0.383 |
| <b>Plectin OS=Mus musculus GN=Plec PE=1 SV=3</b>                                                      | 0.988 | 1.032 | 1.010 | 1.249 | 1.259 | 1.288 |
| <b>Drebrin OS=Mus musculus GN=Dbn1 PE=1 SV=4</b>                                                      | 1.000 | 0.997 | 0.999 | 1.077 | 0.906 | 1.171 |
| <b>Protein canopy homolog 2 OS=Mus musculus GN=Cnpy2 PE=1 SV=1</b>                                    | 1.052 | 1.078 | 1.065 | 1.121 | 1.019 | 1.039 |
| <b>Microtubule-actin cross-linking factor 1 OS=Mus musculus GN=Macf1 PE=1 SV=2</b>                    | 0.940 | 1.014 | 0.977 | 1.155 | 0.930 | 1.003 |
| <b>N-alpha-acetyltransferase 10 OS=Mus musculus GN=Naa10 PE=1 SV=1</b>                                | 1.000 | 1.044 | 1.022 | 1.345 | 1.296 | 1.147 |
| <b>Chloride intracellular channel protein 4 OS=Mus musculus GN=Clic4 PE=1 SV=3</b>                    | 1.036 | 1.004 | 1.020 | 1.181 | 1.322 | 1.310 |
| <b>DnaJ homolog subfamily A member 2 OS=Mus musculus GN=Dnaja2 PE=1 SV=1</b>                          | 0.951 | 0.791 | 0.871 | 0.583 | 0.714 | 1.017 |
| <b>Toll-interacting protein OS=Mus musculus GN=Tollip PE=1 SV=1</b>                                   | 1.000 | 0.745 | 0.873 | 0.445 | 0.399 | 0.873 |
| <b>Vascular non-inflammatory molecule 3 OS=Mus musculus GN=Vnn3 PE=1 SV=3</b>                         | 1.000 | 1.146 | 1.073 | 1.534 | 0.942 | 1.692 |
| <b>Vacuolar protein sorting-associated protein 29 OS=Mus musculus GN=Vps29 PE=1 SV=1</b>              | 1.000 | 1.130 | 1.065 | 1.628 | 1.662 | 1.752 |
| <b>Actin-related protein 10 OS=Mus musculus GN=Actr10 PE=1 SV=2</b>                                   | 1.000 | 1.015 | 1.008 | 0.895 | 1.216 | 1.138 |
| <b>Eukaryotic translation initiation factor 3 subunit I OS=Mus musculus GN=Eif3i PE=1 SV=1</b>        | 1.000 | 1.010 | 1.005 | 1.370 | 1.317 | 1.455 |
| <b>Coatamer subunit gamma-1 OS=Mus musculus GN=Copg1 PE=1 SV=1</b>                                    | 1.143 | 1.121 | 1.132 | 1.096 | 1.341 | 1.283 |
| <b>Glypican-1 OS=Mus musculus GN=Gpc1 PE=1 SV=1</b>                                                   | 1.000 | 1.153 | 1.076 | 0.927 | 0.759 | 1.134 |
| <b>Ubiquilin-2 OS=Mus musculus GN=Ubqln2 PE=1 SV=2</b>                                                | 1.000 | 0.952 | 0.976 | 1.169 | 0.865 | 1.259 |
| <b>Afadin OS=Mus musculus GN=Milt4 PE=1 SV=3</b>                                                      | 1.000 | 0.849 | 0.925 | 0.708 | 0.831 | 0.917 |
| <b>Unconventional myosin-XV OS=Mus musculus</b>                                                       | 1.000 | 1.010 | 1.005 | 1.460 | 0.967 | 1.174 |

|                                                                                                     |       |       |       |       |       |       |
|-----------------------------------------------------------------------------------------------------|-------|-------|-------|-------|-------|-------|
| GN=Myo15a PE=1 SV=2                                                                                 |       |       |       |       |       |       |
| Cathepsin F OS=Mus musculus GN=Ctsf PE=1 SV=1                                                       | 1.000 | 1.216 | 1.108 | 0.888 | 0.454 | 0.336 |
| Four and a half LIM domains protein 3 OS=Mus musculus GN=Fhl3 PE=1 SV=2                             | 1.000 | 1.323 | 1.161 | 2.548 | 2.840 | 4.259 |
| Glycogenin-1 OS=Mus musculus GN=Gyg1 PE=1 SV=3                                                      | 1.000 | 0.800 | 0.900 | 1.095 | 0.762 | 0.568 |
| Glypican-6 OS=Mus musculus GN=Gpc6 PE=1 SV=1                                                        | 1.000 | 1.030 | 1.015 | 0.802 | 0.622 | 0.553 |
| Procollagen-lysine,2-oxoglutarate 5-dioxygenase 2 OS=Mus musculus GN=Plod2 PE=1 SV=2                | 1.000 | 0.818 | 0.909 | 0.956 | 0.517 | 0.595 |
| Procollagen-lysine,2-oxoglutarate 5-dioxygenase 3 OS=Mus musculus GN=Plod3 PE=1 SV=1                | 1.000 | 0.946 | 0.973 | 0.709 | 0.756 | 0.819 |
| Procollagen-lysine,2-oxoglutarate 5-dioxygenase 1 OS=Mus musculus GN=Plod1 PE=1 SV=1                | 0.944 | 0.914 | 0.929 | 0.873 | 0.741 | 0.749 |
| Cartilage oligomeric matrix protein OS=Mus musculus GN=Comp PE=1 SV=2                               | 1.000 | 0.956 | 0.978 | 1.249 | 0.732 | 1.387 |
| S-formylglutathione hydrolase OS=Mus musculus GN=Esd PE=1 SV=1                                      | 0.758 | 0.985 | 0.871 | 1.300 | 1.556 | 1.312 |
| Small acidic protein OS=Mus musculus GN=Smap PE=1 SV=1                                              | 1.004 | 0.967 | 0.985 | 1.534 | 1.870 | 1.338 |
| Dextrin OS=Mus musculus GN=Dstn PE=1 SV=3                                                           | 1.047 | 1.020 | 1.033 | 1.394 | 1.660 | 1.493 |
| Prostaglandin E synthase 3 OS=Mus musculus GN=Ptges3 PE=1 SV=1                                      | 0.896 | 0.858 | 0.877 | 0.960 | 1.100 | 0.923 |
| Serine protease HTRA1 OS=Mus musculus GN=Htra1 PE=1 SV=2                                            | 1.029 | 0.889 | 0.959 | 1.142 | 0.758 | 0.938 |
| Pendrin OS=Mus musculus GN=Slc26a4 PE=1 SV=1                                                        | 1.000 | 0.993 | 0.996 | 1.225 | 1.187 | 1.138 |
| Slit homolog 2 protein OS=Mus musculus GN=Slit2 PE=2 SV=2                                           | 1.000 | 0.937 | 0.969 | 0.731 | 0.700 | 0.974 |
| Pre-mRNA-processing factor 40 homolog A OS=Mus musculus GN=Prpf40a PE=1 SV=1                        | 1.000 | 1.020 | 1.010 | 1.348 | 1.035 | 1.434 |
| Ectonucleotide pyrophosphatase/phosphodiesterase family member 2 OS=Mus musculus GN=Enpp2 PE=1 SV=3 | 1.069 | 1.052 | 1.060 | 1.466 | 1.375 | 1.313 |
| Proteasome subunit alpha type-4 OS=Mus musculus GN=Psma4 PE=1 SV=1                                  | 1.102 | 1.142 | 1.122 | 1.909 | 2.004 | 1.593 |
| Proteasome subunit beta type-3 OS=Mus musculus GN=Psmb3 PE=1 SV=1                                   | 1.074 | 1.055 | 1.065 | 1.521 | 1.772 | 1.381 |
| Proteasome subunit beta type-2 OS=Mus musculus GN=Psmb2 PE=1 SV=1                                   | 0.988 | 0.988 | 0.988 | 1.240 | 1.480 | 1.314 |
| Proteasome subunit alpha type-1 OS=Mus musculus GN=Psma1 PE=1 SV=1                                  | 0.931 | 1.119 | 1.025 | 2.234 | 2.459 | 2.164 |
| Transmembrane protein 176B OS=Mus musculus GN=Tmem176b PE=1 SV=1                                    | 1.000 | 1.046 | 1.023 | 0.642 | 1.692 | 1.522 |
| V-type proton ATPase subunit S1 OS=Mus musculus GN=Atp6ap1 PE=1 SV=1                                | 0.952 | 0.925 | 0.938 | 0.979 | 0.744 | 0.975 |
| SUMO-activating enzyme subunit 1 OS=Mus musculus GN=Sae1 PE=1 SV=1                                  | 0.962 | 0.897 | 0.929 | 1.313 | 1.089 | 1.280 |
| Insulin receptor-related protein OS=Mus musculus GN=Insrr PE=1 SV=2                                 | 1.000 | 1.012 | 1.006 | 1.242 | 1.611 | 1.429 |
| RuvB-like 2 OS=Mus musculus GN=Ruvbl2 PE=1 SV=3                                                     | 1.000 | 0.952 | 0.976 | 1.095 | 1.049 | 1.070 |
| Adenylate kinase 2, mitochondrial OS=Mus musculus GN=Ak2 PE=1 SV=5                                  | 1.006 | 1.060 | 1.033 | 1.786 | 1.613 | 1.591 |
| A-kinase anchor protein 12 OS=Mus musculus GN=Akap12 PE=1 SV=1                                      | 1.000 | 1.079 | 1.040 | 0.542 | 0.409 | 0.502 |
| Cadherin-13 OS=Mus musculus GN=Cdh13 PE=1 SV=2                                                      | 0.967 | 0.866 | 0.917 | 1.105 | 1.069 | 1.166 |
| S-phase kinase-associated protein 1 OS=Mus musculus GN=Skp1 PE=1 SV=3                               | 1.017 | 0.928 | 0.972 | 1.317 | 1.356 | 1.266 |
| Cullin-1 OS=Mus musculus GN=Cul1 PE=1 SV=1                                                          | 1.000 | 1.003 | 1.001 | 1.053 | 0.966 | 1.210 |

|                                                                                                               |       |       |       |       |       |       |
|---------------------------------------------------------------------------------------------------------------|-------|-------|-------|-------|-------|-------|
| <b>Prefoldin subunit 5 OS=Mus musculus GN=Pfdn5 PE=1 SV=1</b>                                                 | 0.762 | 0.848 | 0.805 | 1.439 | 1.304 | 1.326 |
| <b>Programmed cell death 6-interacting protein OS=Mus musculus GN=Pdcd6ip PE=1 SV=3</b>                       | 0.956 | 0.940 | 0.948 | 1.288 | 1.194 | 1.244 |
| <b>Phenylalanine--tRNA ligase beta subunit OS=Mus musculus GN=Farsb PE=1 SV=2</b>                             | 1.000 | 1.043 | 1.022 | 1.595 | 2.959 | 3.126 |
| <b>STIP1 homology and U box-containing protein 1 OS=Mus musculus GN=Stub1 PE=1 SV=1</b>                       | 1.000 | 0.872 | 0.936 | 0.873 | 0.964 | 0.777 |
| <b>Eukaryotic translation initiation factor 4H OS=Mus musculus GN=Eif4h PE=1 SV=3</b>                         | 1.000 | 1.022 | 1.011 | 0.806 | 0.925 | 0.765 |
| <b>Coronin-1B OS=Mus musculus GN=Coro1b PE=1 SV=1</b>                                                         | 1.000 | 0.931 | 0.965 | 0.832 | 0.725 | 0.968 |
| <b>Coronin-1C OS=Mus musculus GN=Coro1c PE=1 SV=2</b>                                                         | 1.238 | 1.091 | 1.164 | 1.077 | 1.125 | 1.042 |
| <b>Ubiquitin carboxyl-terminal hydrolase isozyme L5 OS=Mus musculus GN=Uchl5 PE=1 SV=2</b>                    | 1.000 | 0.733 | 0.867 | 0.607 | 0.515 | 0.788 |
| <b>Cathepsin Z OS=Mus musculus GN=Ctsz PE=1 SV=1</b>                                                          | 1.000 | 1.014 | 1.007 | 0.751 | 0.655 | 0.750 |
| <b>Protein FAM50A OS=Mus musculus GN=Fam50a PE=1 SV=1</b>                                                     | 0.954 | 0.902 | 0.928 | 1.092 | 1.305 | 1.370 |
| <b>Actin-related protein 2/3 complex subunit 1B OS=Mus musculus GN=Arpc1b PE=1 SV=4</b>                       | 1.000 | 0.963 | 0.981 | 1.293 | 1.215 | 1.777 |
| <b>Acid ceramidase OS=Mus musculus GN=Asah1 PE=1 SV=1</b>                                                     | 1.000 | 1.073 | 1.037 | 0.854 | 0.735 | 0.960 |
| <b>Vesicle-associated membrane protein-associated protein A OS=Mus musculus GN=Vapa PE=1 SV=2</b>             | 0.969 | 0.945 | 0.957 | 2.578 | 2.847 | 2.723 |
| <b>Sorting nexin-1 OS=Mus musculus GN=Snx1 PE=1 SV=1</b>                                                      | 1.000 | 0.989 | 0.995 | 1.150 | 1.009 | 1.282 |
| <b>Band 4.1-like protein 3 OS=Mus musculus GN=Epb41l3 PE=1 SV=1</b>                                           | 1.000 | 1.011 | 1.006 | 1.097 | 1.131 | 1.149 |
| <b>Mitochondrial import inner membrane translocase subunit Tim8 A OS=Mus musculus GN=Timm8a1 PE=1 SV=1</b>    | 1.000 | 0.970 | 0.985 | 1.757 | 1.391 | 1.555 |
| <b>Mitotic checkpoint protein BUB3 OS=Mus musculus GN=Bub3 PE=1 SV=2</b>                                      | 0.987 | 1.041 | 1.014 | 1.342 | 1.289 | 1.582 |
| <b>Transgelin-2 OS=Mus musculus GN=Tagln2 PE=1 SV=4</b>                                                       | 1.020 | 1.092 | 1.056 | 1.239 | 1.258 | 1.240 |
| <b>Slit homolog 3 protein OS=Mus musculus GN=Slit3 PE=2 SV=2</b>                                              | 1.000 | 0.993 | 0.996 | 1.911 | 0.703 | 0.956 |
| <b>Chloride anion exchanger OS=Mus musculus GN=Slc26a3 PE=1 SV=1</b>                                          | 1.000 | 0.737 | 0.869 | 0.711 | 0.511 | 0.629 |
| <b>Protein kinase C and casein kinase substrate in neurons protein 2 OS=Mus musculus GN=Pacsin2 PE=1 SV=1</b> | 0.998 | 1.362 | 1.180 | 1.666 | 1.849 | 2.097 |
| <b>Forkhead box protein O4 OS=Mus musculus GN=Foxo4 PE=1 SV=1</b>                                             | 1.000 | 1.119 | 1.059 | 1.021 | 0.761 | 1.115 |
| <b>Fibulin-5 OS=Mus musculus GN=Fbln5 PE=1 SV=1</b>                                                           | 0.946 | 0.956 | 0.951 | 0.564 | 0.501 | 0.643 |
| <b>26S proteasome non-ATPase regulatory subunit 13 OS=Mus musculus GN=Psmd13 PE=1 SV=1</b>                    | 0.966 | 1.044 | 1.005 | 1.206 | 1.008 | 1.159 |
| <b>Carboxypeptidase Q OS=Mus musculus GN=Cpq PE=1 SV=1</b>                                                    | 0.992 | 0.933 | 0.963 | 0.781 | 0.667 | 0.882 |
| <b>EGF-containing fibulin-like extracellular matrix protein 2 OS=Mus musculus GN=Efemp2 PE=2 SV=1</b>         | 0.928 | 0.875 | 0.902 | 0.594 | 0.586 | 0.686 |
| <b>EH domain-containing protein 1 OS=Mus musculus GN=Ehd1 PE=1 SV=1</b>                                       | 0.944 | 1.052 | 0.998 | 1.219 | 1.404 | 1.258 |
| <b>Methylthioribulose-1-phosphate dehydratase OS=Mus musculus GN=Apip PE=1 SV=1</b>                           | 1.000 | 0.782 | 0.891 | 1.209 | 1.021 | 0.959 |
| <b>CX3C chemokine receptor 1 OS=Mus musculus GN=Cx3cr1 PE=1 SV=1</b>                                          | 1.000 | 0.789 | 0.894 | 0.213 | 0.177 | 0.236 |
| <b>Guanylate-binding protein 1 OS=Mus musculus GN=Gbp2 PE=1 SV=1</b>                                          | 0.962 | 0.934 | 0.948 | 0.690 | 0.640 | 0.892 |

|                                                                                                     |       |       |       |       |       |       |
|-----------------------------------------------------------------------------------------------------|-------|-------|-------|-------|-------|-------|
| Epididymal secretory protein E1 OS=Mus musculus GN=Npc2 PE=1 SV=1                                   | 0.952 | 1.026 | 0.989 | 0.932 | 0.878 | 0.940 |
| Eukaryotic translation initiation factor 2 subunit 3, X-linked OS=Mus musculus GN=Eif2s3x PE=1 SV=2 | 1.016 | 1.134 | 1.075 | 2.170 | 2.390 | 2.336 |
| Paralemmin-1 OS=Mus musculus GN=Palm PE=1 SV=1                                                      | 1.000 | 0.818 | 0.909 | 0.619 | 0.487 | 0.736 |
| Twinfilin-2 OS=Mus musculus GN=Twf2 PE=1 SV=1                                                       | 1.000 | 1.090 | 1.045 | 1.123 | 1.289 | 2.207 |
| Apoptosis-inducing factor 1, mitochondrial OS=Mus musculus GN=Aifm1 PE=1 SV=1                       | 1.000 | 0.918 | 0.959 | 0.859 | 0.598 | 0.893 |
| Delta-1-pyrroline-5-carboxylate synthase OS=Mus musculus GN=Aldh18a1 PE=1 SV=2                      | 1.000 | 1.223 | 1.111 | 1.562 | 1.064 | 1.821 |
| C-C motif chemokine 8 OS=Mus musculus GN=Ccl8 PE=3 SV=1                                             | 1.000 | 1.006 | 1.003 | 2.008 | 2.813 | 1.760 |
| Heterogeneous nuclear ribonucleoprotein D-like OS=Mus musculus GN=Hnnpdl PE=1 SV=1                  | 1.053 | 0.968 | 1.010 | 1.083 | 1.277 | 1.133 |
| Lysyl oxidase homolog 3 OS=Mus musculus GN=Loxl3 PE=2 SV=2                                          | 1.000 | 1.013 | 1.007 | 0.807 | 0.934 | 0.950 |
| Mitotic spindle assembly checkpoint protein MAD2A OS=Mus musculus GN=Mad2l1 PE=1 SV=2               | 1.000 | 0.835 | 0.917 | 0.713 | 0.664 | 0.746 |
| Eukaryotic translation initiation factor 3 subunit G OS=Mus musculus GN=Eif3g PE=1 SV=2             | 1.053 | 1.060 | 1.057 | 1.474 | 1.484 | 1.579 |
| SUMO-activating enzyme subunit 2 OS=Mus musculus GN=Uba2 PE=1 SV=1                                  | 1.104 | 1.063 | 1.084 | 1.202 | 1.269 | 1.348 |
| V-type proton ATPase subunit C 1 OS=Mus musculus GN=Atp6v1c1 PE=1 SV=4                              | 1.000 | 1.050 | 1.025 | 1.167 | 1.487 | 1.783 |
| E3 ubiquitin-protein ligase ARIH1 OS=Mus musculus GN=Arih1 PE=1 SV=3                                | 1.000 | 0.809 | 0.905 | 0.517 | 0.799 | 0.707 |
| Spliceosome RNA helicase Ddx39b OS=Mus musculus GN=Ddx39b PE=1 SV=1                                 | 1.000 | 1.036 | 1.018 | 1.618 | 1.430 | 1.628 |
| Angiopoietin-related protein 4 OS=Mus musculus GN=Angptl4 PE=2 SV=1                                 | 1.000 | 1.306 | 1.153 | 1.423 | 1.296 | 1.605 |
| Chloride intracellular channel protein 1 OS=Mus musculus GN=Clic1 PE=1 SV=3                         | 1.016 | 1.038 | 1.027 | 1.595 | 1.574 | 1.651 |
| Valine--tRNA ligase OS=Mus musculus GN=Vars PE=1 SV=1                                               | 1.058 | 1.115 | 1.087 | 1.335 | 1.474 | 1.497 |
| Large proline-rich protein BAG6 OS=Mus musculus GN=Bag6 PE=1 SV=1                                   | 0.966 | 0.967 | 0.966 | 1.506 | 1.521 | 1.484 |
| Thrombospondin-4 OS=Mus musculus GN=Thbs4 PE=1 SV=1                                                 | 1.000 | 0.931 | 0.965 | 0.959 | 0.861 | 0.769 |
| Interleukin enhancer-binding factor 3 OS=Mus musculus GN=Ilf3 PE=1 SV=2                             | 1.066 | 0.998 | 1.032 | 1.107 | 1.043 | 1.064 |
| General vesicular transport factor p115 OS=Mus musculus GN=Uso1 PE=1 SV=2                           | 1.000 | 0.991 | 0.996 | 1.205 | 1.424 | 1.446 |
| Serine-threonine kinase receptor-associated protein OS=Mus musculus GN=Strap PE=1 SV=2              | 1.000 | 0.945 | 0.973 | 1.271 | 1.326 | 1.302 |
| Heterogeneous nuclear ribonucleoproteins C1/C2 OS=Mus musculus GN=Hnnpcl PE=1 SV=1                  | 0.992 | 0.909 | 0.950 | 1.108 | 1.532 | 1.195 |
| Peptidyl-prolyl cis-trans isomerase FKBP9 OS=Mus musculus GN=Fkbp9 PE=1 SV=1                        | 1.000 | 0.813 | 0.906 | 0.509 | 0.490 | 0.541 |
| Ubiquitin-conjugating enzyme E2 A OS=Mus musculus GN=Ube2a PE=1 SV=1                                | 1.000 | 1.699 | 1.350 | 1.652 | 1.197 | 0.627 |
| Methyl-CpG-binding domain protein 3 OS=Mus musculus GN=Mbd3 PE=1 SV=1                               | 1.000 | 1.477 | 1.238 | 1.120 | 1.142 | 3.064 |
| Keratin, type I cytoskeletal 16 OS=Mus musculus GN=Krt16 PE=1 SV=3                                  | 1.030 | 0.953 | 0.991 | 0.707 | 0.740 | 0.958 |
| Multiple inositol polyphosphate phosphatase 1 OS=Mus musculus GN=Minpp1 PE=1 SV=3                   | 0.946 | 0.922 | 0.934 | 0.957 | 1.036 | 1.377 |
| Phosphomannomutase 2 OS=Mus musculus GN=Pmm2 PE=1 SV=1                                              | 1.000 | 0.902 | 0.951 | 1.697 | 1.401 | 1.732 |



|                                                                                                     |        |        |        |        |        |        |
|-----------------------------------------------------------------------------------------------------|--------|--------|--------|--------|--------|--------|
| <b>Septin-5 OS=Mus musculus GN=Sept5 PE=1 SV=2</b>                                                  | 1.000  | 1.339  | 1.170  | 0.797  | 1.308  | 1.310  |
| <b>Proteasome subunit alpha type-7 OS=Mus musculus GN=Psma7 PE=1 SV=1</b>                           | 1.140  | 1.174  | 1.157  | 1.621  | 1.759  | 1.674  |
| <b>Proteasome subunit alpha type-5 OS=Mus musculus GN=Psma5 PE=1 SV=1</b>                           | 1.027  | 0.977  | 1.002  | 1.301  | 1.575  | 1.317  |
| <b>Aspartyl aminopeptidase OS=Mus musculus GN=Dnpep PE=1 SV=2</b>                                   | 26.614 | 39.613 | 33.114 | 52.184 | 50.089 | 41.040 |
| <b>Heterogeneous nuclear ribonucleoprotein F OS=Mus musculus GN=Hnrnpf PE=1 SV=3</b>                | 1.043  | 1.142  | 1.092  | 1.386  | 1.547  | 1.343  |
| <b>Proline synthase co-transcribed bacterial homolog protein OS=Mus musculus GN=Prosc PE=1 SV=1</b> | 1.000  | 1.172  | 1.086  | 1.670  | 1.485  | 2.142  |
| <b>U4/U6.U5 tri-snRNP-associated protein 1 OS=Mus musculus GN=Sart1 PE=1 SV=1</b>                   | 0.918  | 1.139  | 1.028  | 1.373  | 1.203  | 1.306  |
| <b>Suppressor of G2 allele of SKP1 homolog OS=Mus musculus GN=Sugt1 PE=2 SV=3</b>                   | 1.026  | 0.944  | 0.985  | 1.194  | 1.436  | 1.418  |
